# Supplementary material
Source: PubMed Central journal article supplement (PMC7677929)

## **Supporting Information**

### **Catalytic Activation of N<sub>2</sub>O at a Low-Valent Bismuth Redox Platform**

Yue Pang, Markus Leutzsch, Nils Nöthling and Josep Cornella\*

Max-Planck-Institut für Kohlenforschung, D-45470 Mülheim an der Ruhr, Germany

cornella@kofo.mpg.de

## Table of Contents

|                                                                                                                           |     |
|---------------------------------------------------------------------------------------------------------------------------|-----|
| <b>1. General Information</b> .....                                                                                       | 4   |
| <b>2. Synthesis and Characterization Data of Ligands</b> .....                                                            | 5   |
| 2.1. Synthesis of Ligand <b>S1</b> .....                                                                                  | 5   |
| 2.2. Synthesis of Ligand <b>S2</b> .....                                                                                  | 6   |
| <b>3. Synthesis and Characterization Data of Organobismuth Complexes</b> .....                                            | 9   |
| 3.1. Synthesis of <i>N,C,N</i> -Chelated-BiCl <sub>2</sub> ( <b>2</b> ) .....                                             | 9   |
| 3.2. Synthesis of <i>N,C,N</i> -Chelated-BiCl <sub>2</sub> ( <b>3</b> ) .....                                             | 10  |
| 3.3. Synthesis of Bismuthinidene ( <b>4</b> ).....                                                                        | 11  |
| 3.4. Synthesis of Bismuthinidene ( <b>5</b> ).....                                                                        | 12  |
| <b>4. N<sub>2</sub>O Oxidation of Bismuthinidenes</b> .....                                                               | 14  |
| 4.1. N <sub>2</sub> O Oxidation of Bismuthinidene ( <b>1</b> ) .....                                                      | 14  |
| 4.2. N <sub>2</sub> O Oxidation of Bismuthinidene ( <b>4</b> ): the Formation of Dimeric Bismuth Oxide ( <b>6</b> )<br>23 |     |
| 4.3. N <sub>2</sub> O Oxidation of Bismuthinidene ( <b>5</b> ): the Formation of Bismuth Hydroxide ( <b>7</b> ) ...       | 32  |
| <b>5. HBpin Reduction of <b>6</b> and <b>7</b></b> .....                                                                  | 38  |
| 5.1. HBpin Reduction of Dimeric Bismuth Oxide ( <b>6</b> ) .....                                                          | 38  |
| 5.2. HBpin Reduction of Bismuth Hydroxide ( <b>7</b> ) .....                                                              | 41  |
| <b>6. Catalytic N<sub>2</sub>O Deoxygenation</b> .....                                                                    | 44  |
| 6.1. Characterization of Products <b>8</b> and <b>9</b> .....                                                             | 44  |
| 6.2. General Procedure for Catalytic N <sub>2</sub> O Deoxygenation .....                                                 | 46  |
| 6.3. Table S2: Catalytic N <sub>2</sub> O Deoxygenation with HBpin.....                                                   | 47  |
| 6.4. NMR Spectra of Catalytic N <sub>2</sub> O Deoxygenation .....                                                        | 48  |
| <b>7. The Mechanistic Proposal</b> .....                                                                                  | 57  |
| <b>8. X-ray Crystallographic Studies</b> .....                                                                            | 60  |
| 8.1. Single Crystal Structure Analysis of <b>2</b> , <b>1·DCM</b> .....                                                   | 60  |
| 8.2. Single Crystal Structure Analysis of <b>3</b> , <b>1·TCM</b> .....                                                   | 66  |
| 8.3. Single Crystal Structure Analysis of <b>4</b> , <b>1·<i>n</i>-Pentane</b> .....                                      | 72  |
| 8.4. Single Crystal Structure Analysis of <b>5</b> .....                                                                  | 80  |
| 8.5. Single Crystal Structure Analysis of <b>6</b> , <b>3·toluene</b> .....                                               | 86  |
| 8.6. Single Crystal Structure Analysis of <b>7</b> .....                                                                  | 95  |
| <b>9. GC Analysis of N<sub>2</sub> Formation</b> .....                                                                    | 103 |
| <b>10. References</b> .....                                                                                               | 109 |

|                              |     |
|------------------------------|-----|
| <b>11. NMR Spectra</b> ..... | 111 |
|------------------------------|-----|

## 1. General Information

Unless otherwise stated, all manipulations were performed under argon using standard Schlenk line techniques or in a MBraun argon-filled glove box.

**Instruments:** Flash chromatography: Merck silica gel 60 (40-63  $\mu\text{m}$ ). ESI-MS: ESQ 3000 (Bruker). Accurate mass determinations: Bruker APEX III FT-MS (7 T magnet) or MAT 95 (Finnigan). NMR spectra were recorded using a Bruker AVIII HD 300 MHz, Bruker Advance III HD 400 MHz or Bruker AVIII 500 MHz spectrometer.  $^1\text{H}$  and  $^{13}\text{C}$  chemical shifts are reported relative to the solvent residual peak as an internal standard. For  $^1\text{H}$  NMR:  $\text{CDCl}_3$ ,  $\delta$  7.26; THF- $d_8$ ,  $\delta$  3.58; toluene- $d_8$ ,  $\delta$  2.08;  $\text{CD}_3\text{OD}$ ,  $\delta$  3.31. For  $^{13}\text{C}$  NMR:  $\text{CDCl}_3$ ,  $\delta$  77.16; THF- $d_8$ ,  $\delta$  67.57; toluene- $d_8$ ,  $\delta$  20.43;  $\text{CD}_3\text{OD}$ ,  $\delta$  49.00.  $^{11}\text{B}$  NMR chemical shifts were referenced to pinacolborane (28.0 ppm, THF- $d_8$ ). NMR yields were determined by using mesitylene as internal standard. For each spectrum 16 FIDs were averaged and the relaxation delay between experiments was set to 30 s. GC-TCD measurements were performed on Agilent Technologies GC 7890B with a 30 m HP-Plot 5  $\text{\AA}$  Molsieve column. Melting points were measured with an EZ-Melt Automated Melting Point Apparatus from Stanford Research Systems.

**Chemicals:**  $\text{N}_2\text{O}$  was provided by Air Liquide containing less than 5 ppm  $\text{N}_2$ , 1 ppm  $\text{H}_2\text{O}$  and 1 ppm air and  $\text{O}_2$ . THF- $d_8$  and toluene- $d_8$  were purchased from Eurisotop, degassed by repeated freeze-pump-thaw cycles, distilled from the proper drying agents, and stored over 4  $\text{\AA}$  molecular sieves. 4  $\text{\AA}$  molecular sieves were activated at 200  $^\circ\text{C}$  under high vacuum ( $1 \times 10^{-4}$  bar) for 3 days. Anhydrous *n*-pentane, THF,  $\text{Et}_2\text{O}$  and toluene were distilled from appropriate drying agents and were transferred under argon. Anhydrous *n*-hexane and benzene were purchased from Millipore Sigma-Aldrich. Anhydrous  $\text{BiCl}_3$  (99.9%, trace metal basis) was purchased from Alfa Aesar. Cobaltocene (min. 98%) was purchased from Strem Chemicals and stored in the freezer of the glove box prior to use. Bismuthinidene **1** was prepared by the reported method.<sup>1</sup> Unless otherwise noted, all reagents were obtained from commercial suppliers and used without further purification.



## 2. Synthesis and Characterization Data of Ligands

### 2.1. Synthesis of Ligand S1

#### 2,6-Diphenylaniline

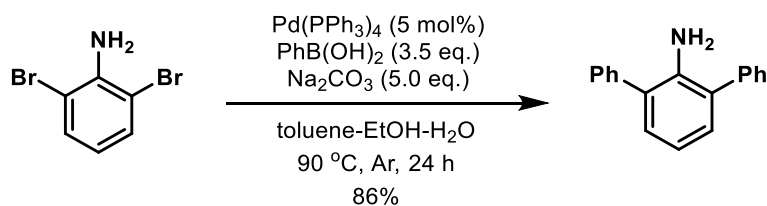

2,6-Diphenylaniline was prepared by the literature method with modifications.<sup>2</sup>

Procedure: a 500 mL three-necked flask equipped with a reflux condenser was charged with 2,6-dibromoaniline (10.0 g, 39.9 mmol), phenylboronic acid (17.0 g, 139.5 mmol, 3.5 equiv.), Na<sub>2</sub>CO<sub>3</sub> (21.1 g, 199.3 mmol, 5.0 equiv.). The setup was evacuated and refilled with argon. A liquid mixture of toluene (100 mL), H<sub>2</sub>O (40 mL) and EtOH (20 mL) was degassed by freeze-pump-thaw cycles and transferred to the flask under argon. After that, Pd(PPh<sub>3</sub>)<sub>4</sub> (2.3 g, 2.0 mmol, 5 mol%) was added to the suspension under argon. After stirred at 90 °C for 24 h, the reaction mixture was cooled to room temperature, filtered through Celite pad, and the filtrate was partitioned with EtOAc and H<sub>2</sub>O. The organic layer was separated and evaporated under reduced pressure. The residue was purified by column chromatography on silica gel (hexane/DCM, 5:1 to 4:1 to 3:1, v/v) to afford 8.4 g 2,6-diphenylaniline as a white crystalline solid in 86% yield.

<sup>1</sup>H NMR (400 MHz, CDCl<sub>3</sub>): δ 7.57 – 7.52 (m, 4H), 7.51 – 7.46 (m, 4H), 7.42 – 7.35 (m, 2H), 7.16 (d, *J* = 7.6 Hz, 2H), 6.92 (t, *J* = 7.5 Hz, 1H), 3.85 (br. s, 2H, NH<sub>2</sub>).

<sup>13</sup>C NMR (101 MHz, CDCl<sub>3</sub>): δ 140.9, 139.9, 129.9, 129.4, 129.0, 128.1, 127.4, 118.3.

The spectral data matched with those reported in the literature.<sup>2</sup>

#### Ligand S1

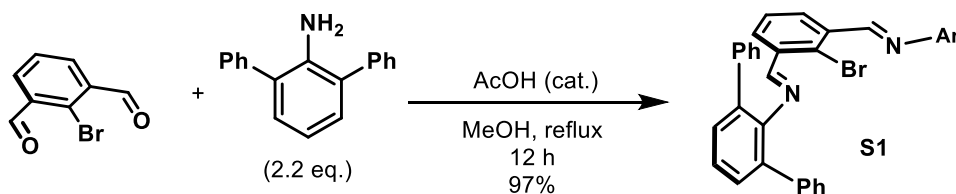

Procedure: to a 100 mL round-bottom flask equipped with a reflux condenser, 2-bromoisophthalaldehyde (1.00 g, 4.7 mmol), 2,6-diphenylaniline (2.53 g, 10.3 mmol), MeOH (25 mL) and AcOH (4 drops) were added in sequence. Then the mixture was heated to reflux with rapid stirring for 12 h, during which the pale yellow product crushed out. The solid was

filtered, washed with MeOH three times and dried at 110 °C under high vacuum. **S1** was obtained as a pale yellow powder (3.02 g, 96%).

**<sup>1</sup>H NMR (400 MHz, CDCl<sub>3</sub>):** δ 8.24 (s, 2H), 7.68 (d, *J* = 7.7 Hz, 2H), 7.40 – 7.33 (m, 12H), 7.33 – 7.26 (m, 10H), 7.25 – 7.19 (m, 4H), 7.16 (t, *J* = 7.7 Hz, 1H).

**<sup>13</sup>C NMR (101 MHz, CDCl<sub>3</sub>):** δ 164.2, 148.1, 140.0, 135.3, 133.9, 131.3, 130.3, 130.2, 128.2, 127.7, 127.5, 126.8, 125.1.

**M.p.:** 187.9 – 189.3 °C.

**HRMS (ESI):** calc'd for C<sub>44</sub>H<sub>31</sub>N<sub>2</sub>BrNa<sup>+</sup> [M+Na]<sup>+</sup> 689.15629; found 689.15720.

## 2.2. Synthesis of Ligand **S2**

The synthetic route to ligand **S2**

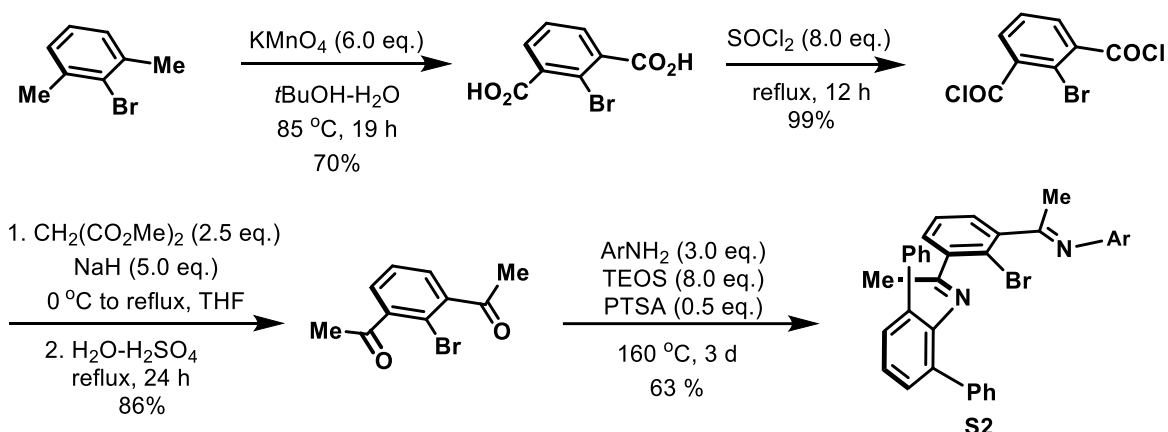

### 2-Bromoisophthalic acid

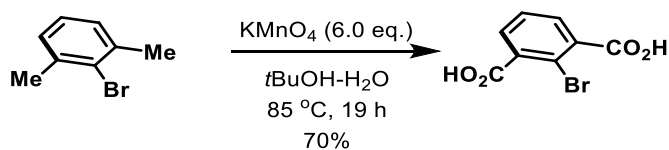

2-bromoisophthalic acid was prepared by the literature method with modifications.<sup>3</sup>

Procedure: to a 1 L round-bottom flask equipped with a condenser 2-bromo-1,3-dimethylbenzene (18.0 g, 97.3 mmol), H<sub>2</sub>O (280 mL) and *t*BuOH (140 mL) were added. KMnO<sub>4</sub> (92.2 g, 583.6 mmol, 6.0 equiv.) was added portionwise and the solution was heated to reflux for 19 h. After this time, the reaction was quenched by adding 20 mL EtOH and filtered through Celite pad while still hot. The filtrate was evaporated to dryness and 140 mL

20% HCl was added. Filtration, washing with water and drying under high vacuum afforded 16.7 g (70%) title compound as a white solid.

$^1\text{H NMR}$  (400 MHz,  $\text{CD}_3\text{OD}$ ):  $\delta$  7.73 (d,  $J = 7.6$  Hz, 2H), 7.49 (dd,  $J = 8.1, 7.4$  Hz, 1H).

$^{13}\text{C NMR}$  (101 MHz,  $\text{CD}_3\text{OD}$ ):  $\delta$  169.9, 137.9, 132.5, 128.5, 118.4.

The spectral data matched with those reported in the literature.<sup>3</sup>

### 2,6-Diacetylbromobenzene

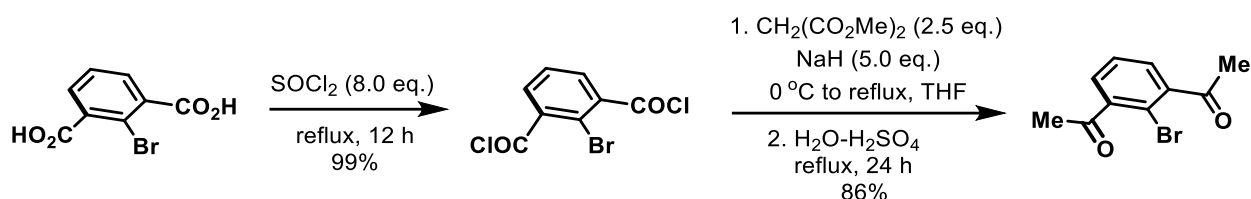

2,6-Diacetylbromobenzene was prepared by the literature method with modifications.<sup>4</sup>

*Preparation of 2,6-bis(chlorocarbonyl)bromobenzene:* 2-bromoisophthalic acid (12.7 g, 51.8 mmol) was suspended in 30 mL of thionyl chloride in a Schlenk flask equipped with a Teflon screw cap. The reaction mixture was heated to reflux for 12 h, during which the starting material completely dissolved. The reaction mixture was concentrated *in vacuo* and the residue was kept under high vacuum overnight. The 2,6-bis(chlorocarbonyl)bromobenzene was obtained as an off-white solid (14.5 g, 99%) and used for the next step without further purification.

*Preparation of 2,6-diacetylbromobenzene:* NaH (6.0 g, 248.3 mmol, 5.0 equiv.) and 50 mL dry THF were added to a 500 mL argon-filled three-necked flask equipped with a stirring bar, a dropping funnel and a reflux condenser. The mixture was cooled by an ice bath, and subsequently 100 mL THF solution of dimethyl malonate (16.4 g, 124.1 mmol, 2.5 equiv.) was added dropwise via the dropping funnel. After the addition, the mixture was heated to reflux and then a 60 mL THF solution of 2,6-diacetylbromobenzene (14.0 g, 49.7 mmol) was added dropwise. After 12 h of reflux, the reaction was quenched by slow addition of 100 mL 10%  $\text{H}_2\text{SO}_4$ . The reaction mixture was concentrated *in vacuo* and extracted with  $\text{Et}_2\text{O}$ . After removal of the solvent, the crude was refluxed for 24 h in a mixture of  $\text{H}_2\text{O}$  (22 mL), conc.  $\text{H}_2\text{SO}_4$  (8.6 mL) and AcOH (40 mL). After this time, the reaction mixture was diluted with water and extracted with EtOAc twice. The combined organic layers were washed with brine, dried over  $\text{K}_2\text{CO}_3$  and  $\text{NaSO}_4$  and concentrated *in vacuo*. The residue was purified by column chromatography on silica gel (hexane/EtOAc, 4:1 to 2:1, v/v) to afford 10.3 g 2,6-diacetylbromobenzene as a pale yellow oil in 86% yield.

$^1\text{H NMR}$  (400 MHz,  $\text{CDCl}_3$ ):  $\delta$  7.46 – 7.37 (m, 3H), 2.62 (s, 6H).

$^{13}\text{C NMR}$  (101 MHz,  $\text{CDCl}_3$ ):  $\delta$  201.8, 143.9, 129.4, 128.0, 114.0, 30.8.

The spectral data matched with those reported in the literature.<sup>4</sup>

## Ligand S2

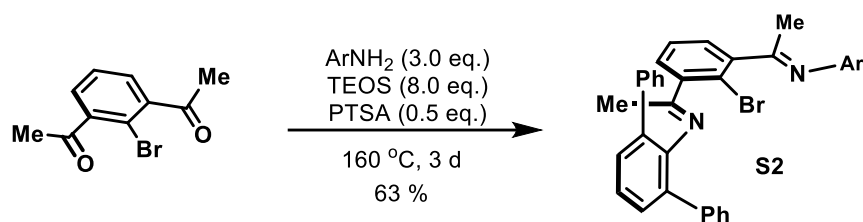

Ligand S2 was prepared by the literature method with modifications.<sup>5</sup>

Procedure: a 50 mL pressure Schlenk fitted with a J-Young valve was charged with 2,6-diphenylaniline (4.00 g, 16.3 mmol, 3.0 equiv.) and *p*-toluenesulfonic acid monohydrate (PTSA, 0.52 g, 2.7 mmol, 0.5 equiv.). The Schlenk was evacuated and refilled with argon. 2,6-Diacetyl bromobenzene (1.31 g, 5.4 mmol) and tetraethyl orthosilicate (TEOS, 9.7 mL, 8.0 equiv.) were added under argon. The reaction mixture was stirred at 160 °C for 3 days.

The reaction was quenched by addition of 20 mL NaOH (aq., 10%) and EtOH (15 mL) and SiO<sub>2</sub> crushed out. The mixture was stirred for additional 2 h and filtered through a pad of Celite. The pad was washed with a mixture of DCM and EtOAc, and the filtrate was concentrated *in vacuo*. The residue was dissolved in DCM and washed with H<sub>2</sub>O. The organic layer was dried over anhydrous Na<sub>2</sub>SO<sub>4</sub> and concentrated *in vacuo*. The residue was purified by column chromatography on silica gel (hexane/DCM, 4:1 to hexane/EtOAc, 15:1 to 10:1, v/v) to afford 2.38 g S2 as a white crystalline solid in 63% yield.

<sup>1</sup>H NMR (400 MHz, CDCl<sub>3</sub>): δ 7.44 – 7.38 (m, 8H), 7.38 – 7.33 (m, 6H), 7.33 – 7.28 (m, 10H), 7.28 – 7.21 (m, 2H), 6.89 (t, *J* = 7.6 Hz, 1H), 6.24 (d, *J* = 7.6 Hz, 2H), 1.59 (s, 6H).

<sup>13</sup>C NMR (101 MHz, CDCl<sub>3</sub>): δ 169.7, 146.1, 143.8, 140.4, 132.7, 129.8, 129.7, 128.5, 128.3, 127.2, 126.9, 124.2, 116.3, 23.3.

M.p.: 213.4 – 214.8 °C.

HRMS (ESI): calc'd for C<sub>46</sub>H<sub>35</sub>N<sub>2</sub>BrNa<sup>+</sup> [M+Na]<sup>+</sup> 717.18759; found 717.18860.

### 3. Synthesis and Characterization Data of Organobismuth Complexes

General note:

1. Carbons attached to Bi were observed by  $^{13}\text{C}$  NMR. At room temperature these signals were generally broadened due to quadrupole relaxation effects of  $^{209}\text{Bi}$  (100%, spin 9/2, quadrupole moment  $-0.4 \times 10^{-28}\text{m}^2$ ). At lower temperatures those  $^{13}\text{C}$  signals were usually sharper.
2. The reducing agents (K-Selectride, and  $\text{KC}_8$ ) for the preparation of the reported bismuthinidenes failed to give clean reduction of *N,C,N*-chelated- $\text{BiCl}_2$  **2** and **3**, complicating the purification.<sup>1, 6</sup> However, the reduction with  $\text{Cp}_2\text{Co}$  at room temperature gave NMR-pure **4** and **5**, which could be worked up by filtration and removal of solvents. The reduction reaction could be scaled up to gram-scale without noticeable decrease of yields. Bismuthinidenes **1** could be prepared in the same procedure.

#### 3.1. Synthesis of *N,C,N*-Chelated- $\text{BiCl}_2$ (**2**)

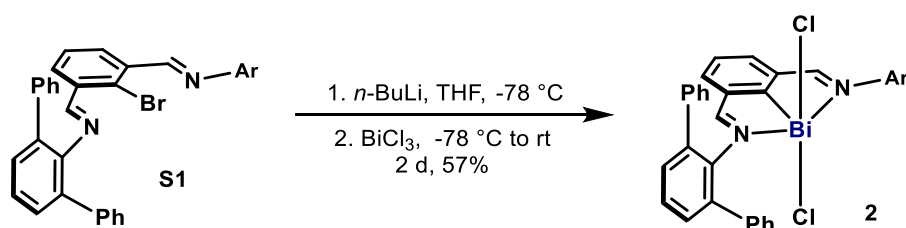

*N,C,N*-chelated- $\text{BiCl}_2$  (**2**) was prepared by the literature method with modifications.<sup>7</sup>

Procedure: To a dry ice/acetone-cooled solution of **S1** (2.34 g, 3.50 mmol) in dry THF (40 mL), *n*-BuLi (1.4 mL, 2.6 M in hexane, 3.68 mmol, 1.05 equiv.) was added dropwise under argon. The resulting dark red solution was stirred at this temperature for 4 h and then transferred via a cannula under argon to a precooled suspension of  $\text{BiCl}_3$  (1.21 g, 3.85 mmol, 1.10 equiv.) in THF (20 mL) at  $-78\text{ }^\circ\text{C}$ . The resulting dark brown mixture was stirred at room temperature for 2 days.

The work-up was carried out without the protection of argon. The reaction mixture was evaporated to dryness, re-dissolved in DCM and filtered through a Celite bed. The filtrate was concentrated *in vacuo* to ca. 20 mL and hexane was used for precipitation of the product. Filtration afforded *N,C,N*-chelated- $\text{BiCl}_2$  (**2**) as a bright yellow powder (1.99 g, 66%).

$^1\text{H}$  NMR (400 MHz,  $\text{CDCl}_3$ ):  $\delta$  9.19 (s, 2H), 7.54 – 7.45 (m, 10H), 7.42 (dd,  $J = 8.2, 6.7$  Hz, 1H), 7.39 – 7.30 (m, 18H).

$^{13}\text{C}$  NMR (101 MHz,  $\text{CDCl}_3$ ):  $\delta$  226.2 (Bi-C), 177.2 (C=N), 146.7, 143.0, 138.9, 137.3, 136.7, 131.6, 130.3, 129.4, 128.5, 127.8, 127.2.

M.p.:  $275\text{ }^\circ\text{C}$  (dec.).

HRMS (ESI): calc'd for  $\text{C}_{44}\text{H}_{31}\text{N}_2\text{BiCl}^+$  [ $\text{M}-\text{Cl}$ ] $^+$  831.19741; found 831.19741.

Single crystals suitable for X-ray crystallography were obtained by slow evaporation of a CH<sub>2</sub>Cl<sub>2</sub> solution of **2** at room temperature.

### 3.2. Synthesis of *N,C,N*-Chelated-BiCl<sub>2</sub> (**3**)

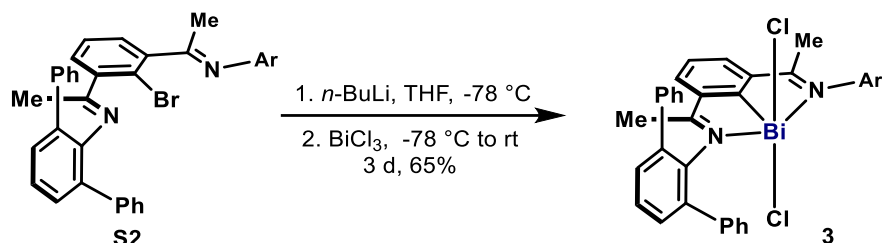

Procedure: to a dry ice/acetone-cooled solution of **S2** (1.50 g, 2.16 mmol) in dry THF (35 mL), *n*-BuLi (0.87 mL, 2.6 M in hexane, 2.26 mmol 1.05 equiv.) was added dropwise under argon. The resulting orange-red solution was stirred at this temperature for 5.5 h and then transferred via a cannula to a dry ice/acetone-cooled suspension of BiCl<sub>3</sub> (0.75 g, 2.37 mmol, 1.1 equiv.) in THF (15 mL). The resulting orange mixture was stirred at room temperature for 3 days.

The work-up was carried out without the protection of argon. The reaction mixture was evaporated to dryness, re-dissolved in CH<sub>2</sub>Cl<sub>2</sub> and filtered through Celite bed. The filtrate was concentrated *in vacuo* to ca. 15 mL and hexane was used for precipitation of the product. Filtration and washing of the solid repeatedly with Et<sub>2</sub>O afforded *N,C,N*-chelated-BiCl<sub>2</sub> (**3**) as a bright yellow powder (1.26 g, 65%).

Note: the procedure reported by Dostál<sup>6</sup> for the preparation of similar structures failed for this reaction because the excess amount of *n*-BuLi resulted in a severe *n*-butyl addition reaction to the imine site, which was confirmed by ESI-HRMS. Therefore, *n*-BuLi solution was titrated prior to use and the amount of *n*-BuLi used for lithiation was carefully controlled. Besides, hydrodebromination byproduct crushed out from the mother liquor and was isolated in 14% yield.

**<sup>1</sup>H NMR (400 MHz, CDCl<sub>3</sub>):** δ 7.84 (d, *J* = 7.7 Hz, 2H), 7.51 – 7.41 (m, 9H), 7.37 (s, 6H), 7.32 – 7.23 (m, 12H), 1.91 (s, 6H).

**<sup>13</sup>C NMR (101 MHz, CDCl<sub>3</sub>):** δ 220.0 (Bi-C), 182.0 (C=N), 148.3, 140.9, 139.0, 136.5, 135.8, 131.1, 130.0, 129.2, 128.5, 127.8, 127.1, 22.5.

**M.p.:** 278 °C (dec.).

**HRMS (ESI):** calc'd for C<sub>46</sub>H<sub>35</sub>N<sub>2</sub>BiCl<sup>+</sup> [M-Cl]<sup>+</sup> 859.22822; found 859.22882.

Single crystals suitable for X-ray crystallography were obtained by slow diffusion of *n*-pentane into a concentrated CHCl<sub>3</sub> solution of **3** at 0 °C overnight.

### 3.3. Synthesis of Bismuthinidene (**4**)

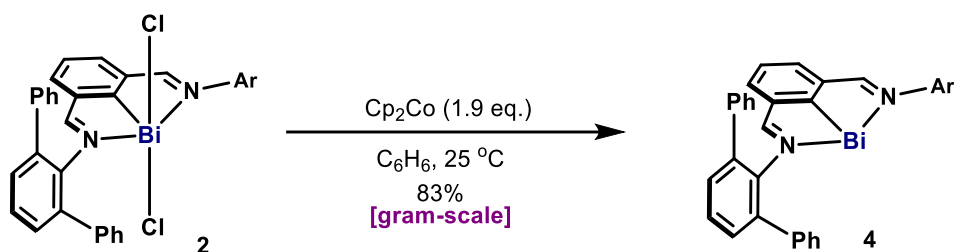

Procedure: in a glove box, **2** (1.50 g, 1.73 mmol) and benzene (anhydrous and degassed, 50 mL) were added to a 100 mL Schlenk flask. At room temperature, cobaltocene (0.62 g, 3.28 mmol, 1.9 equiv.) was added portionwise to this suspension under rapid stirring. The resulting dark purple mixture was stirred for an additional 2 h and the Schlenk flask was taken out of the glove box. Cobaltocenium chloride was filtered off under argon. The filtrate was frozen and benzene was removed by sublimation *in vacuo* to afford bismuthinidene (**4**) as a dark purple powder (1.14 g, 83%).

Characterization of **4**:

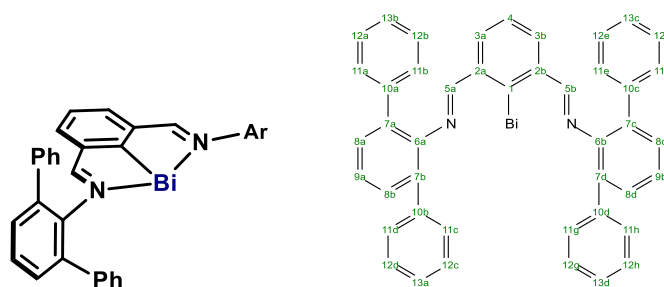

**$^1\text{H}$  NMR (500 MHz, THF-*d*<sub>8</sub>):**  $\delta$  9.18 (s, 2H, H-5), 7.65 (d,  $J = 7.4$  Hz, 2H, H-3), 7.40 (d,  $J = 7.6$  Hz, 4H, H-8), 7.27 (dd,  $J = 8.1, 7.2$  Hz, 2H, H-9), 7.22 – 7.18 (m, 8H, H-11), 7.10 – 7.06 (m, 12H, H-12, H-13), 6.68 (t,  $J = 7.4$  Hz, 1H, H-4).

**$^{13}\text{C}$  NMR (126 MHz, THF-*d*<sub>8</sub>):**  $\delta$  219.1 (C-1), 172.5 (C-5), 147.9 (C-6), 145.1 (C-2), 141.0 (C-10), 137.5 (C-7), 136.5 (C-3), 130.9 (C-11), 130.7 (C-8), 128.7 (C-12), 127.4 (C-13), 126.5 (C-9), 122.9 (C-4).

The protons and carbons are assigned according to HSQC and HMBC.

**M.p.:** 260.8 – 262.3 °C (dark oil).

**HRMS (EI):** calc'd for  $\text{C}_{44}\text{H}_{31}\text{N}_2\text{Bi}^+$   $[\text{M}]^+$  796.22915; found 796.22951.

#### Details of EI-MS measurement of Bi(I) (**4** and **5**)

For EI-MS analysis, the Bi(I) complexes were filled into a small crucible within the Schlenk tube under argon. The sample was then directly transferred into a direct insertion probe and then into the ion source, which was under vacuum. In the course of the experiment the probe

was heated up to a maximum of 400°C. At some temperatures the sample components sublimated in the vacuum and were directly ionized and measured.

For aldimine-based Bi(I) (**4**), a clear run was shown. However, there were partially decomposition compounds observed for ketimine-based Bi(I) (**5**). In both cases, the original molecular ions were found as the major peaks.

In an argon-filled Schlenk tube, single crystals suitable for X-ray crystallography were obtained by layer diffusion of *n*-pentane into a concentrated toluene solution of **4** at -35 °C overnight.

### 3.4. Synthesis of Bismuthinidene (**5**)

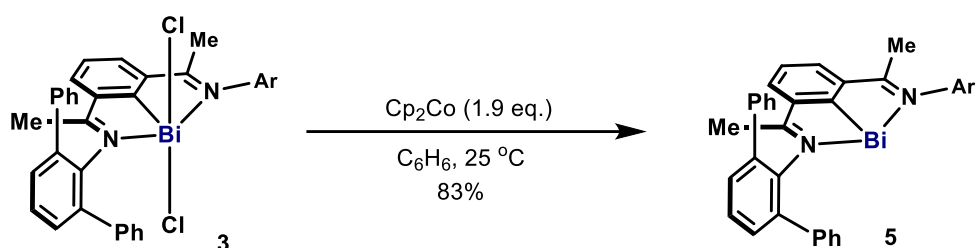

Procedure: in a glove box, **3** (421 mg, 0.47 mmol) and benzene (anhydrous and degassed, 20 mL) were added to a 100 mL Schlenk flask. At room temperature, cobaltocene (169 mg, 0.89 mmol, 1.9 equiv.) was added portionwise to this suspension under rapid stirring. The resulting dark red-purple mixture was stirred for 2 h and then the Schlenk flask was taken out of the glove box. Cobaltocenium chloride was filtered off under argon. The filtrate was frozen and benzene was removed by sublimation *in vacuo* to afford bismuthinidene (**5**) as a dark red-purple powder (322 mg, 83%).

Characterization of **5**:

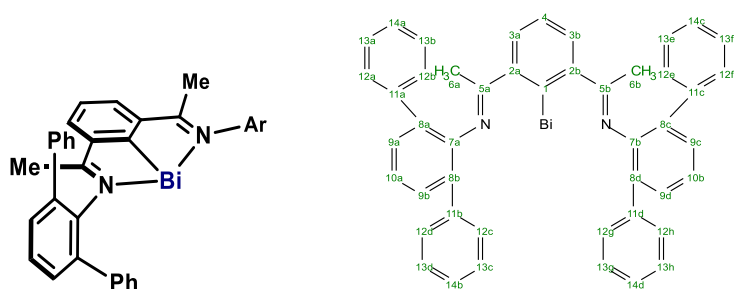

**<sup>1</sup>H NMR (400 MHz, THF-*d*<sub>8</sub>):** δ 7.87 (d, *J* = 7.6 Hz, 2H, H-3), 7.39 (d, *J* = 7.6 Hz, 4H, H-9), 7.27 (dd, *J* = 8.2, 7.0 Hz, 2H, H-10), 7.19 – 7.12 (m, 8H, H-12), 7.10 – 7.02 (m, 12H, H-13, H-14), 6.72 (t, *J* = 7.6 Hz, 1H, H-4), 2.71 (s, 6H, H-6).

**<sup>13</sup>C NMR (101 MHz, THF-*d*<sub>8</sub>):** δ 211.1 (C-1), 173.1 (C-5), 145.5 (C-2), 145.3 (C-7), 141.1 (C-11), 137.2 (C-8), 133.9 (C-3), 131.2 (C-12), 130.6 (C-9), 128.6 (C-13), 127.5 (C-14), 126.2 (C-10), 122.4 (C-4), 20.4 (C-6).

The protons and carbons are assigned according to HSQC and HMBC.



**M.p.:** 257.3 – 259.5 °C (dark oil).

**HRMS (EI):** calc'd for  $C_{46}H_{35}N_2Bi^+$  [M]<sup>+</sup> 824.26044; found 824.26062.

In a glove box, single crystals suitable for X-ray crystallography were obtained by layer diffusion of *n*-pentane into a concentrated THF solution of **5** in a NMR tube for 4 days.

## 4. N<sub>2</sub>O Oxidation of Bismuthinidenes

### 4.1. N<sub>2</sub>O Oxidation of Bismuthinidene (**1**)

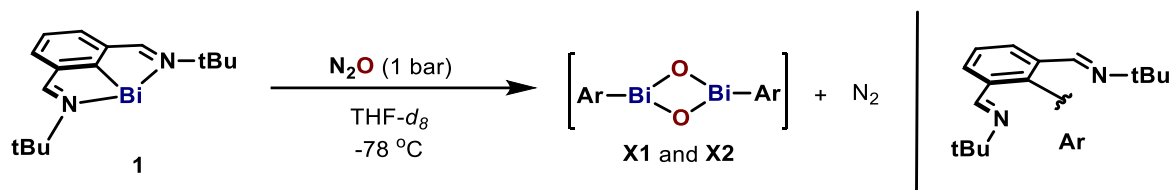

Procedure: in a glove box, bismuthinidene (**1**) (1.1 mg, 2.4 μmmol) and THF-*d*<sub>8</sub> (0.8 mL) were added to an oven-dried 10 mL pressure Schlenk tube fitted with a J-Young valve. The concentration of **1** is 3.0 μmol/mL. The Schlenk tube was taken out of the glove box and connected to a Schlenk line and a N<sub>2</sub>O bottle via a three-way tubing system. The system was degassed by freeze-pump-thaw, backfilled with N<sub>2</sub>O (1 bar) at -78 °C and stirred for about 45 min, during which the color of the solution changed gradually from green into pale yellow. The solution was immediately transferred into a J-Young NMR tube in the glove box. The J-Young NMR tube was cooled in dry ice prior to NMR study.

Summary of NMR, ESI-MS and GC-TCD studies of N<sub>2</sub>O oxidation of bismuthinidene (1):

- **Structures:** **X1** and **X2** contain intact ligand scaffolds and C–Bi bonds; **X1** has a symmetric structure while **X2** has an asymmetric structure; **X1** is in equilibrium with **X2** (**X1/X2** = 5:1); [(LBiO)<sub>2</sub>+H]<sup>+</sup> was found in ESI-HRMS;
- **Stability:** **X1** and **X2** decomposed gradually at room temperature; the possible decomposition pathway is disproportionation to Bi<sub>2</sub>O<sub>3</sub> and (L<sub>2</sub>Bi)<sub>2</sub>O;
- **N<sub>2</sub>O activation:** N<sub>2</sub> formation was detected by GC-TCD (see GC Analysis of N<sub>2</sub> formation).

Based on above mentioned and the studies on dimeric bismuth oxide **6** (*vide infra*), **X1** and **X2** are postulated to be a *syn*- or an *anti*-dimeric bismuth oxide with dynamic imine coordination behavior. The low concentration of this stoichiometric reaction simulates the catalytic reaction condition, suggesting that dimeric bismuth oxide species might be involved in the catalytic reactions.

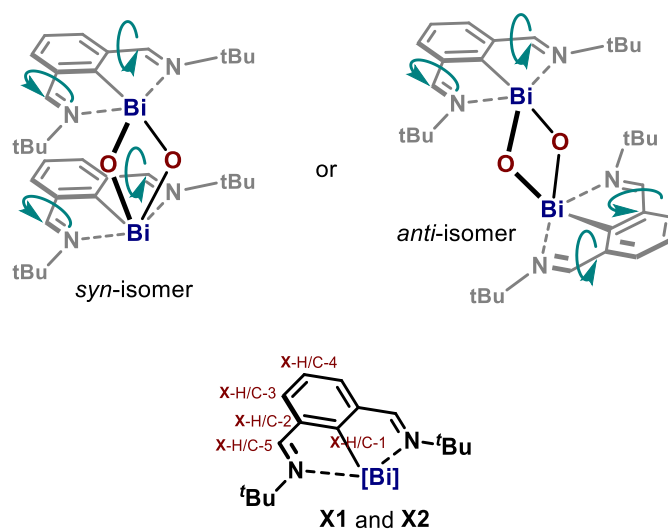

The peaks are named as *X-H/C- position* based on this numbering system.

<sup>1</sup>H/<sup>13</sup>C chemical shifts and ROESY correlations:

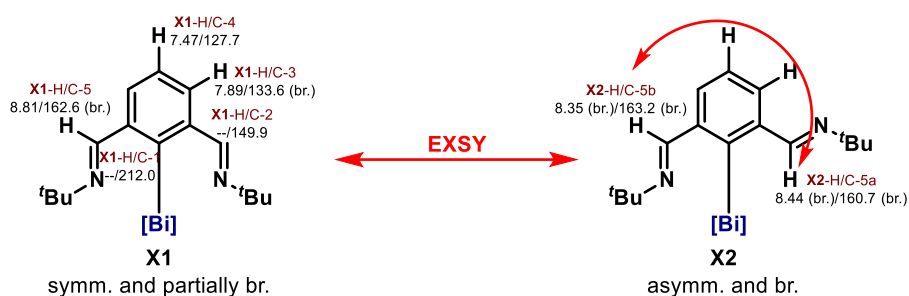

$^1\text{H}$  NMR (THF- $d_8$ , 600 MHz,  $-40\text{ }^\circ\text{C}$ )

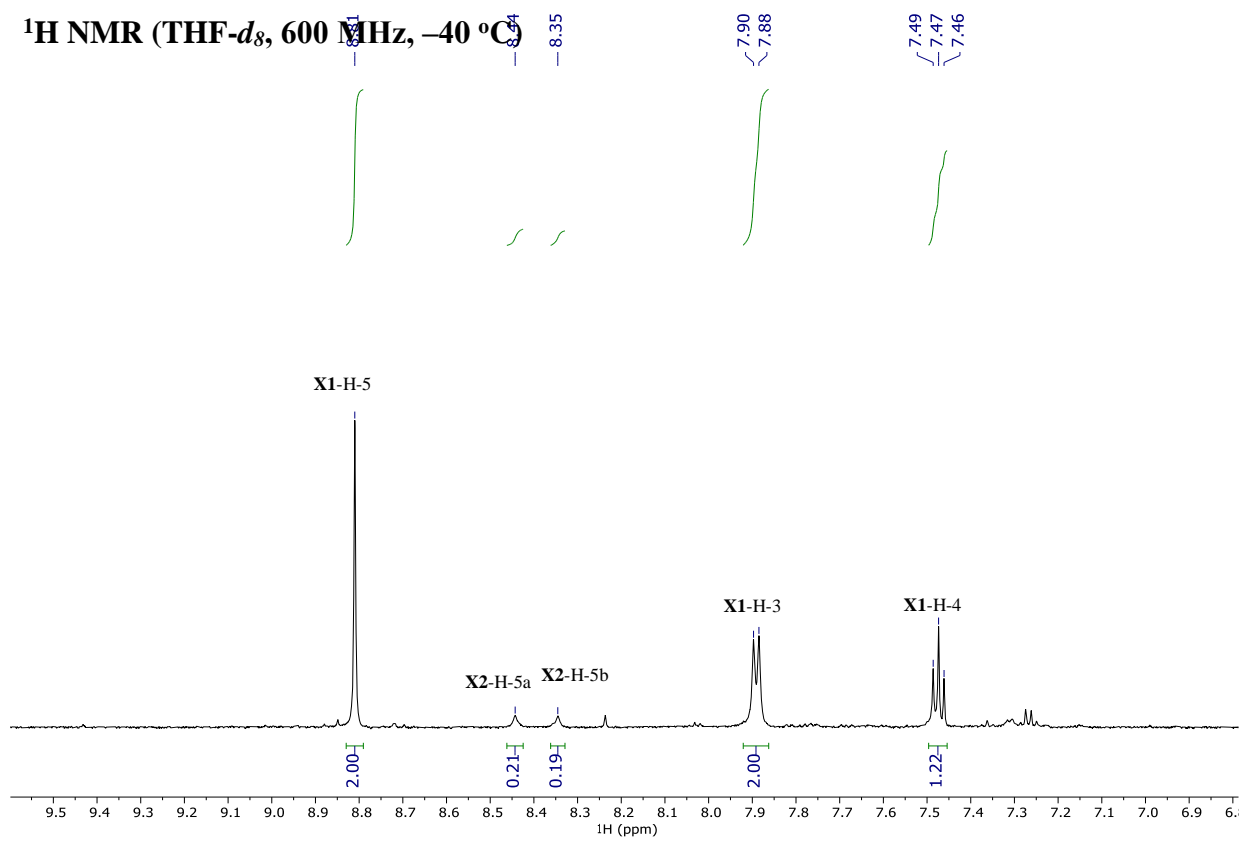

**X1** has a symmetric structure while **X2** has an asymmetric structure.

$^{13}\text{C}$  NMR (THF- $d_8$ , 151 MHz,  $-40\text{ }^\circ\text{C}$ )

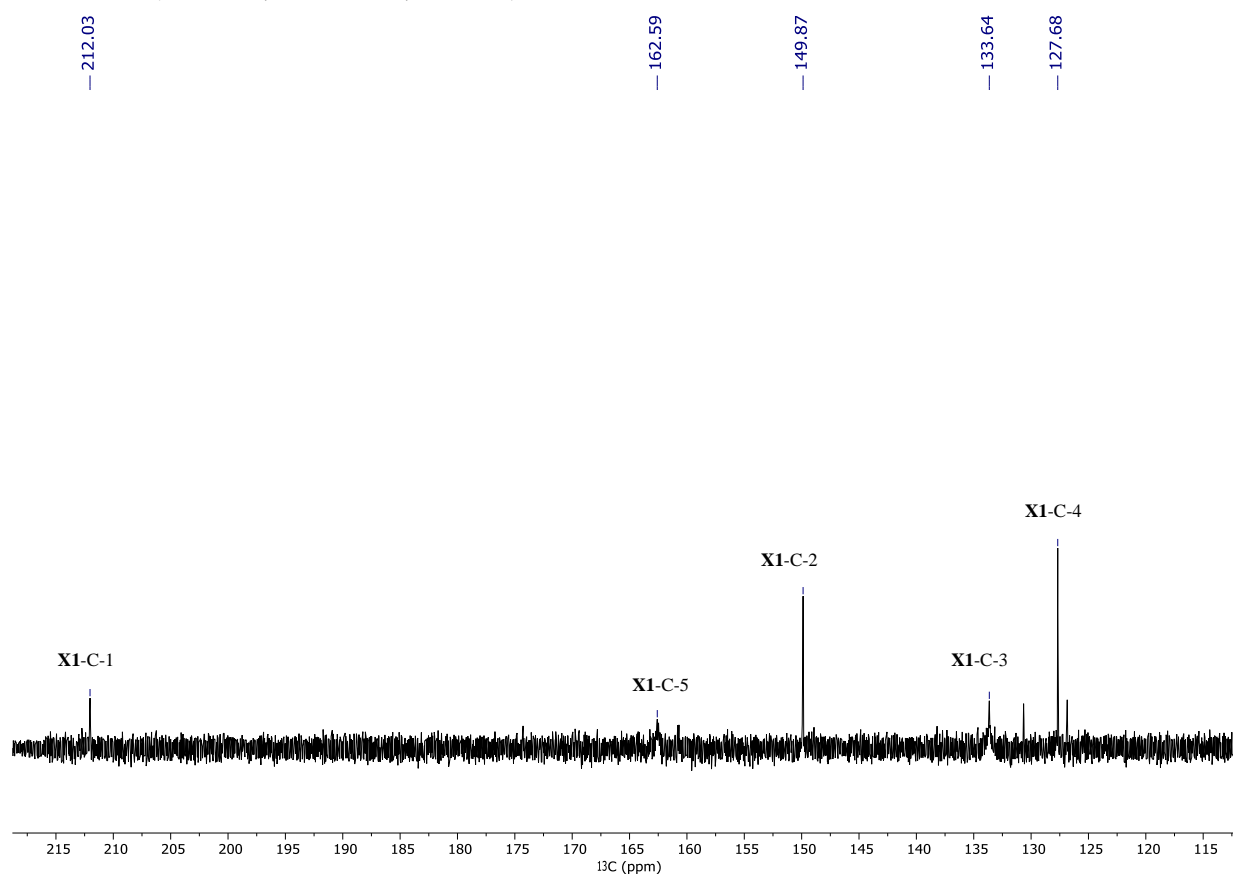

**X1-C-3** and **X1-C-5** are broadened because of the exchange of **X1** and **X2**. The carbons of **X2** are below are hidden within the noise.

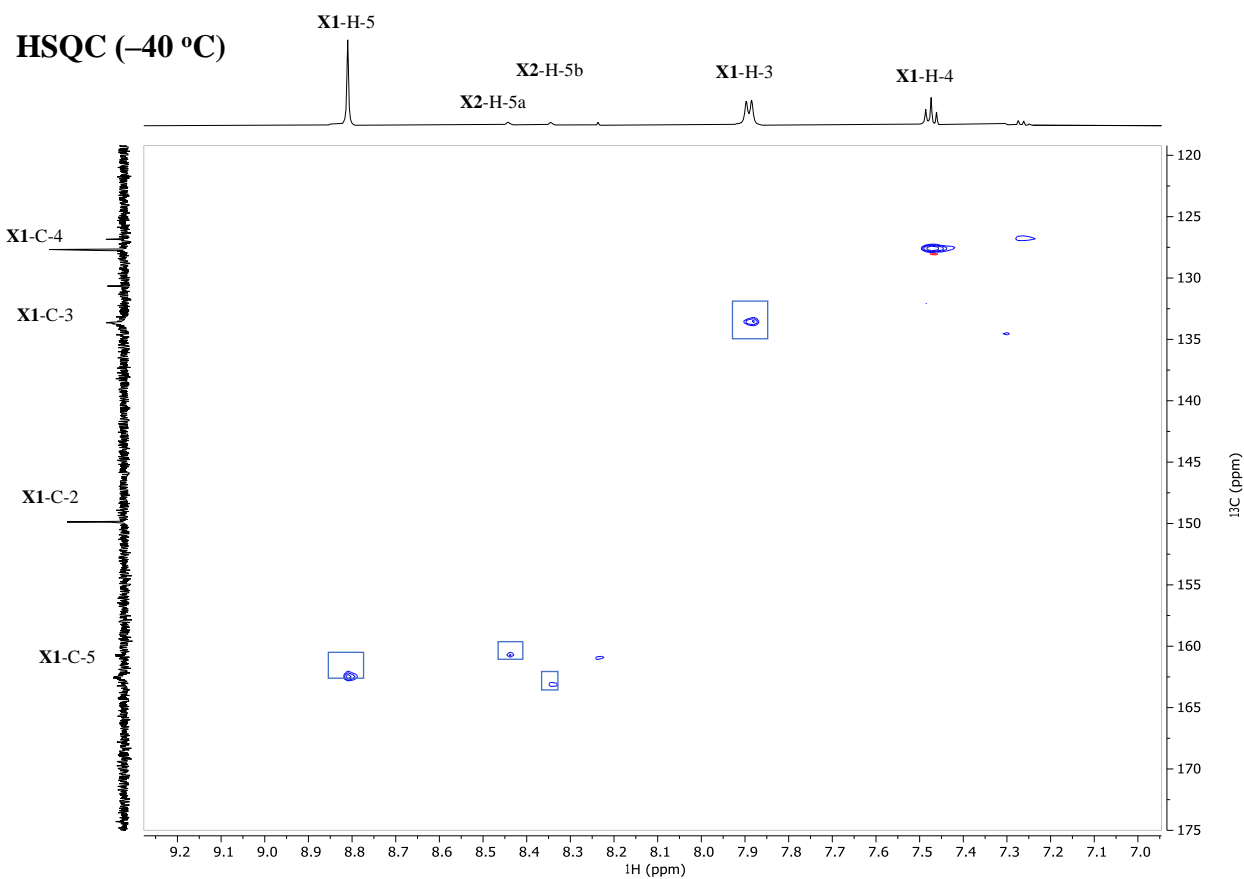

HSQC shows that **X1-H-3** and **X1-H-5** correlate to the broadened **X1-C-3** and **X1-C-5**. The correlations between **X2-H-5a/b** and **X2-C-5a/b** ( $\delta$  160.7 and 163.2 ppm) can also be observed.

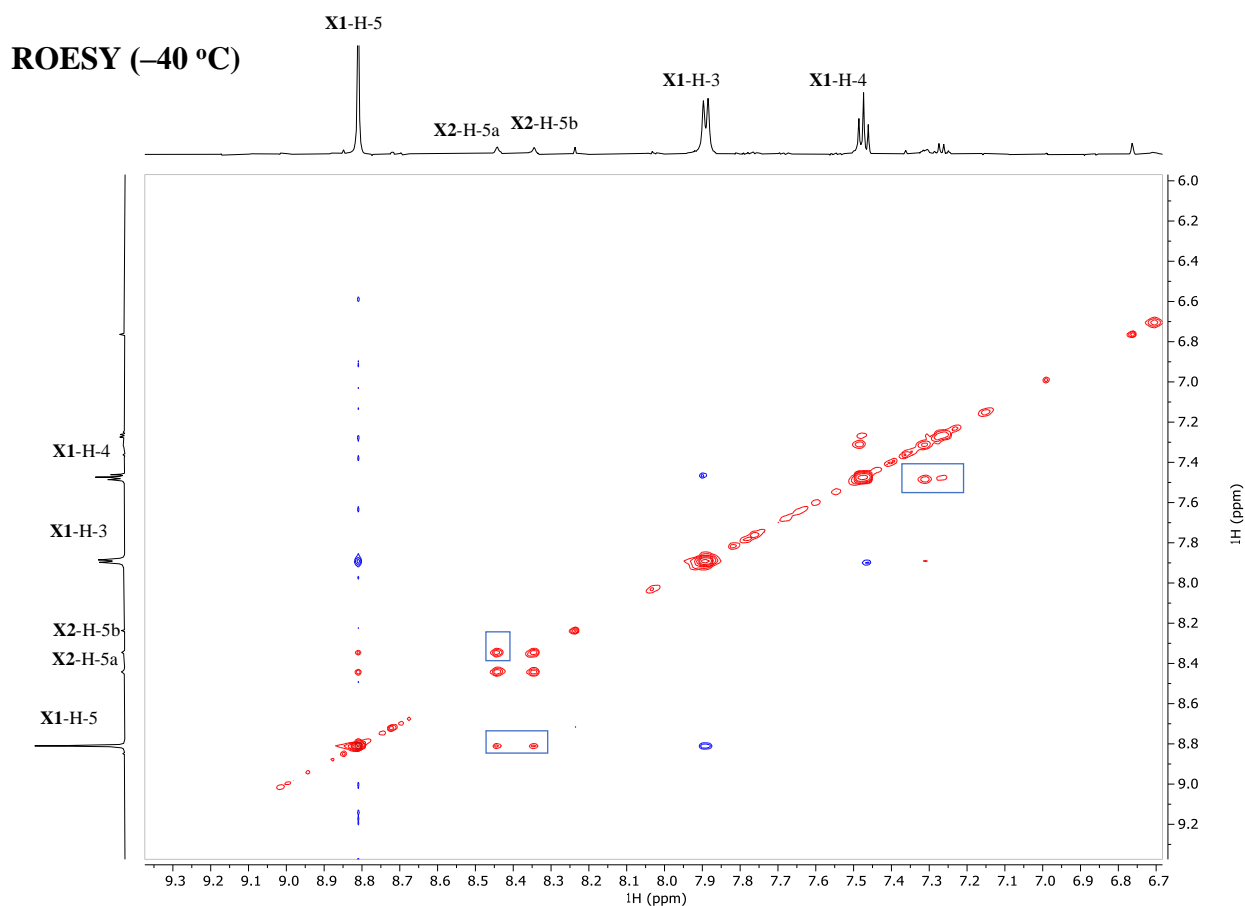

ROE signals are shown in **blue** (close to each other in space) while EXSY signals in **red** (chemical interconversions). An EXSY cross-peak identifies a signal that is converted into another signal by a process such as dissociation, coordination and rotation).

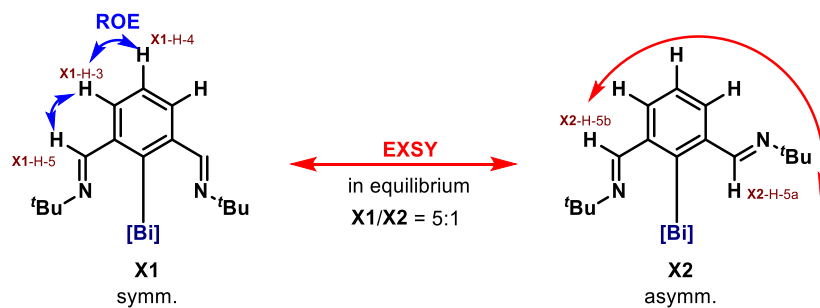

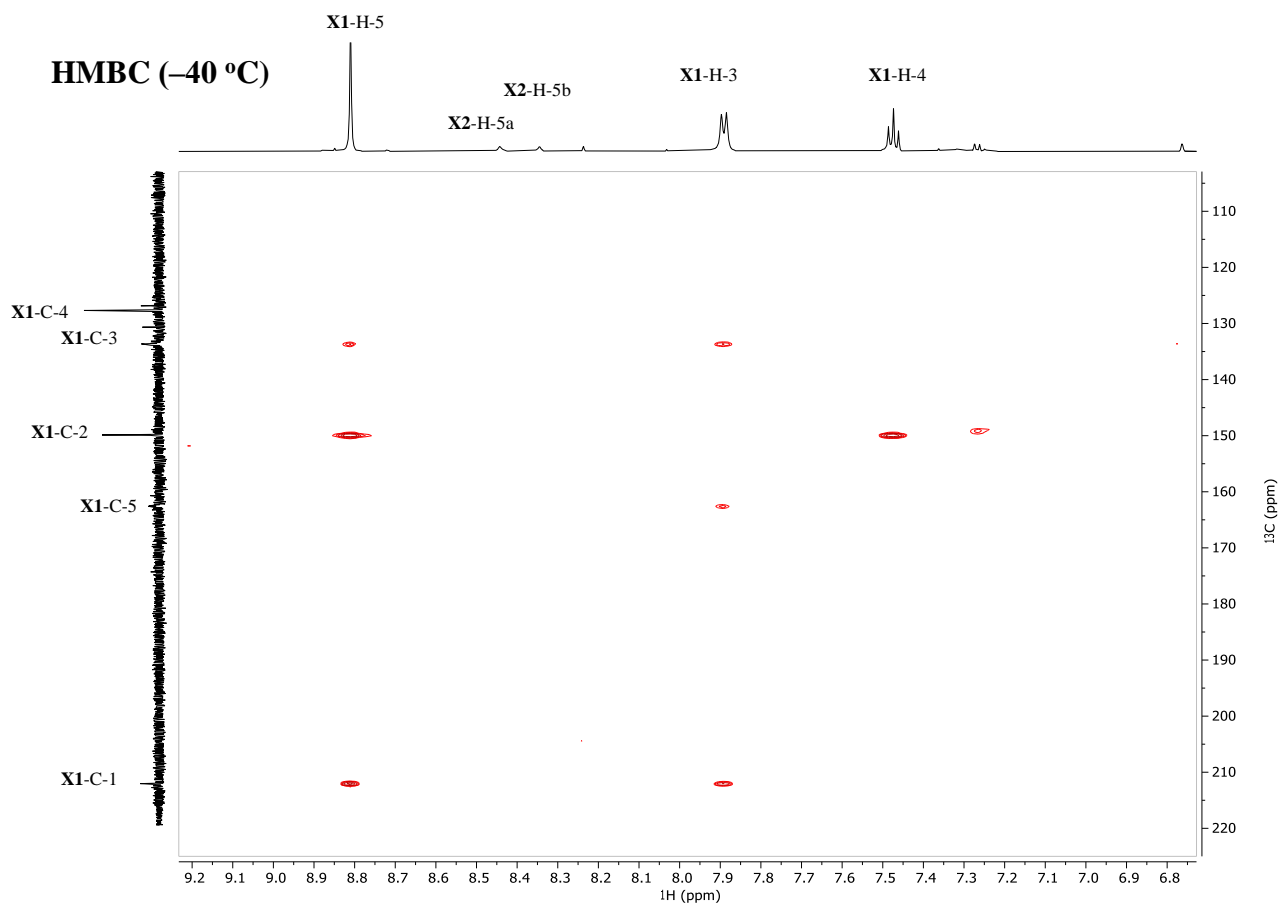



### <sup>1</sup>H-NMR spectra at different temperatures (−40 °C to 25 °C)

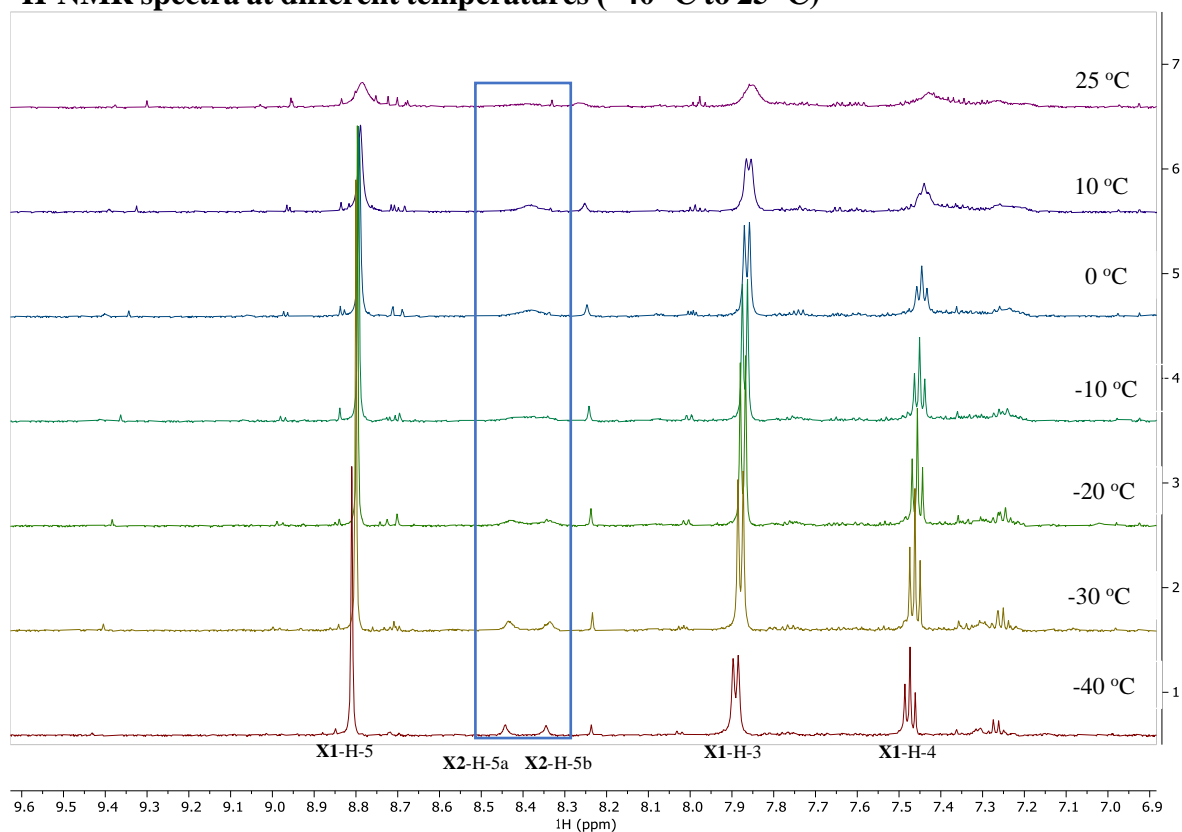

Variable temperature NMR data (−40 °C to 25 °C) shows that the signals of **X1** and **X2** are broadening with increasing temperatures. **X2-H-5a** and **X2-H-5b** are coalescent from approximately -10 °C.

The sample was stored at room temperature overnight and measured again. <sup>1</sup>H NMR (−40 °C) shows that **X1** and **X2** have fully decomposed.

### MS studies:

After the reaction, ESI-MS experiments were performed immediately under argon and at low temperature. Characteristic ions found in ESI-MS are 469  $[\text{ArBi}=\text{O}+\text{H}]^+$  and 937  $[(\text{ArBiO})_2+\text{H}]^+$ . **HRMS (ESI):** calc'd for  $\text{C}_{32}\text{H}_{47}\text{Bi}_2\text{N}_4\text{O}_2^+$   $[(\text{LBiO})_2+\text{H}]^+$  937.33012; found 937.33070.

The result of ESI-MS supports that oxobismuth species might exist as dimeric forms in the solution.

ESI-MS was also performed for a long-stored reaction sample. The result shows that oxobismuth species were almost not detected, instead, the major peak was suggested to be  $[\text{L}_2\text{Bi}]^+$ . **HRMS (ESI):** calc'd for  $\text{C}_{32}\text{H}_{46}\text{BiN}_4^+$   $[\text{L}_2\text{Bi}]^+$  695.35208; found 695.35243. And black precipitate was found on the bottom of the reaction tube. Based on these findings, it is suggested that one decomposition pathway could be ascribed to disproportionation.

### Details of ESI-MS measurement of oxo-bismuth species:

All oxo-bismuth samples were stored in argon-filled Schlenk tubes and the procedures and results of the ESI-(HR)MS analysis were as follows:

For ESI-MS analysis, THF solutions of the mixture of oxo-bismuth compounds obtained from  $\text{N}_2\text{O}$  oxidation of Bi(I) (**1**) and  $\text{Bi}_2\text{O}_2$  (**6**) and Bi-OH (**7**, in solid form), were diluted with anhydrous and degassed MeCN and quickly injected into ESI-source. After injection, the sample was surrounded by a  $\text{N}_2$  flow supporting the formation of the spray, but exposure to air could not be completely discarded at this point. No chemical (e.g. protic solvents or acetic acid) was used to promote ionization. The decomposition of these compounds was not fast due to the reluctance of these oxo-bismuth species to react with  $\text{O}_2$  or moisture (slow reaction) from the air. On the other hand, the very high sensitivity of the ESI-MS spectrometers in our institute ensures that a little part of intact target molecules in the solution is enough to give the high mass accuracy of the determined mass.

For  $\text{Bi}_2\text{O}_2$  (**6**), the  $[\text{Bi}_2\text{O}_2+\text{H}]^+$  peak was found but the major peak corresponds to  $[\text{Bi}=\text{O}+\text{H}]^+$ . This disaggregation process was also reported in previous literature (G. Strîmb, A. Pöllnitz, C. I. Raț, C. Silvestru, *Dalton Trans.*, **2015**, *44*, 9927.). For Bi-OH (**7**),  $[\text{M}+\text{H}]^+$  and  $[\text{M}+\text{CH}_3]^+$  are the dominant peaks.

#### 4.2. N<sub>2</sub>O Oxidation of Bismuthinidene (**4**): the Formation of Dimeric Bismuth Oxide (**6**)

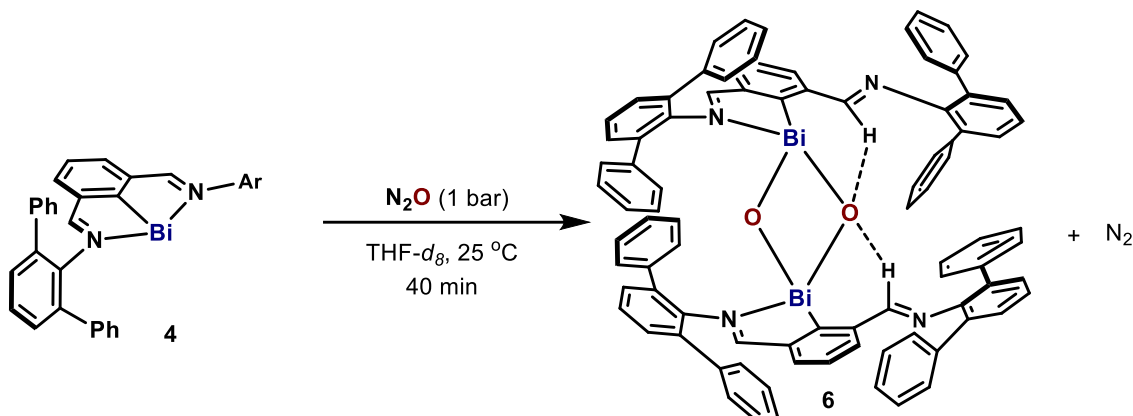

In a glove box, **4** (20.0 mg, 0.0251 mmol) and THF-*d*<sub>8</sub> (0.8 mL) were added to an oven-dried 10 mL pressure Schlenk tube fitted with a J-Young valve. The Schlenk tube was taken out of the glove box and connected to a Schlenk line and a N<sub>2</sub>O bottle via a three-way tubing system. The system was degassed by freeze-pump-thaw, backfilled with N<sub>2</sub>O (about 1 bar) and stirred at 25 °C for 40 min, during which slow formation of N<sub>2</sub> was observed and the color of the solution changed gradually from dark purple into pale yellow. The solution was transferred into a J-Young NMR tube in the glove box for the NMR study.

#### Characterization of **6**:

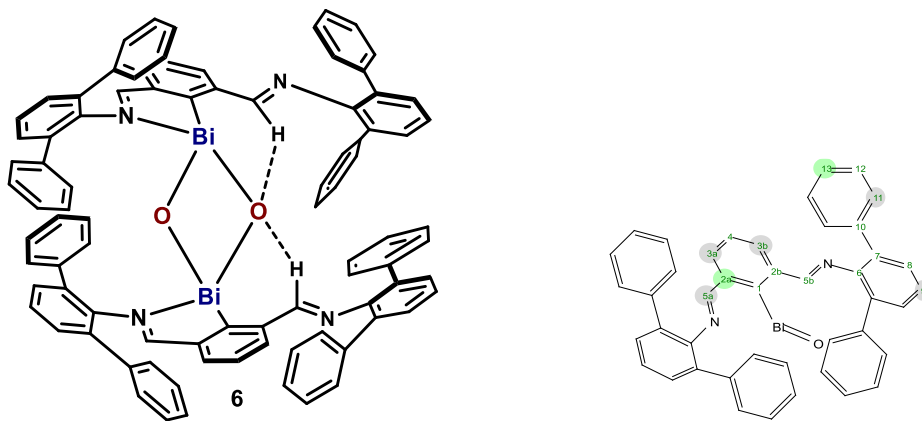

**<sup>1</sup>H NMR (400 MHz, THF-*d*<sub>8</sub>, -50 °C):** δ 10.04 (s, 2H, H-5b), 8.35 (dd, *J* = 7.1, 2.2 Hz, 2H), 8.25 – 8.15 (br. m, 2H), 8.11 (s, 2H, H-5a), 7.69 (d, *J* = 7.6 Hz, 4H), 7.58 – 7.35 (m, 20H), 7.32 – 7.25 (br. m, 4H), 7.17 (d, *J* = 7.6 Hz, 4H), 7.13 – 7.07 (br. m, 2H), 6.90 (t, *J* = 7.5 Hz, 4H), 6.83 (t, *J* = 7.8 Hz, 4H), 6.77 (t, *J* = 7.6 Hz, 2H), 6.64 (d, *J* = 7.6 Hz, 2H), 6.59 (t, *J* = 7.5 Hz, 2H), 6.48 (d, *J* = 7.9 Hz, 4H), 6.36 – 6.18 (br. m, 2H).

**<sup>13</sup>C NMR (101 MHz, THF-*d*<sub>8</sub>, -50 °C):** δ 211.8 (C-1), 176.1 (C-5a), 166.9 (C-5b), 150.2, 147.8, 147.1, 145.2, 142.0, 141.3, 141.0, 139.3, 137.7, 135.5, 135.3, 135.1, 134.1, 133.7, 132.6, 132.4

(br.), 131.5, 131.5, 131.1 (br.), 130.8 (br.), 130.4 (br.), 130.2, 129.9 (br.), 129.7, 129.2 (br.), 128.6 (br.), 128.5 (br.), 128.3 (br.), 127.7 (br.), 127.6 (br.), 126.8 (br.), 126.4 (br.), 126.0 (br.).

**<sup>1</sup>H NMR (400 MHz, THF-*d*<sub>8</sub>, 60 °C):** δ 8.99 (s, 4H, H-5), 7.74 (d, *J* = 7.6 Hz, 4H, H-3), 7.32 – 7.20 (m, 18H, H-4, H-11), 7.11 – 6.98 (m, 36H, H-8, H-9, H-12, H-13).

**<sup>13</sup>C NMR (101 MHz, THF-*d*<sub>8</sub>, 60 °C):** δ 213.9 (C-1), 171.1 (C-5), 148.4 (C-2), 147.3 (C-6), 141.3 (C-10), 135.6 (C-3), 134.9 (C-7), 131.4 (C-11), 131.2 (C-8), 128.6 (C-12), 128.2 (C-4), 127.4 (C-13), 125.9 (C-9).

The protons and carbons are assigned according to HSQC and HMBC.

**HRMS (ESI):** calc'd for C<sub>88</sub>H<sub>63</sub>Bi<sub>2</sub>N<sub>4</sub>O<sub>2</sub><sup>+</sup> [M+H]<sup>+</sup> 1625.45532; found 1625.45673.

In an argon-filled Schlenk flask, single crystals suitable for X-ray crystallography were obtained by slow diffusion of *n*-pentane into a concentrated toluene solution of **6** at –78 °C (dry ice) for a 1 week.

#### **Stability:**

1. **6** is a moisture-sensitive compound. The imine moiety hydrolyzed gradually when trace amount of H<sub>2</sub>O existed in the system. 2,6-Diphenylaniline was detected by <sup>1</sup>H NMR.
2. **6** partially decomposed when the solvent was removed. The sublimation of a C<sub>6</sub>D<sub>6</sub> solution of **6** gave an off-white solid, which could not be fully re-dissolved in C<sub>6</sub>D<sub>6</sub>. <sup>1</sup>H NMR showed that decomposition occurred to certain degree in the solution phase.

## <sup>1</sup>H-NMR at different temperatures:

a. Decrease of the temperatures (25 °C to -90 °C)

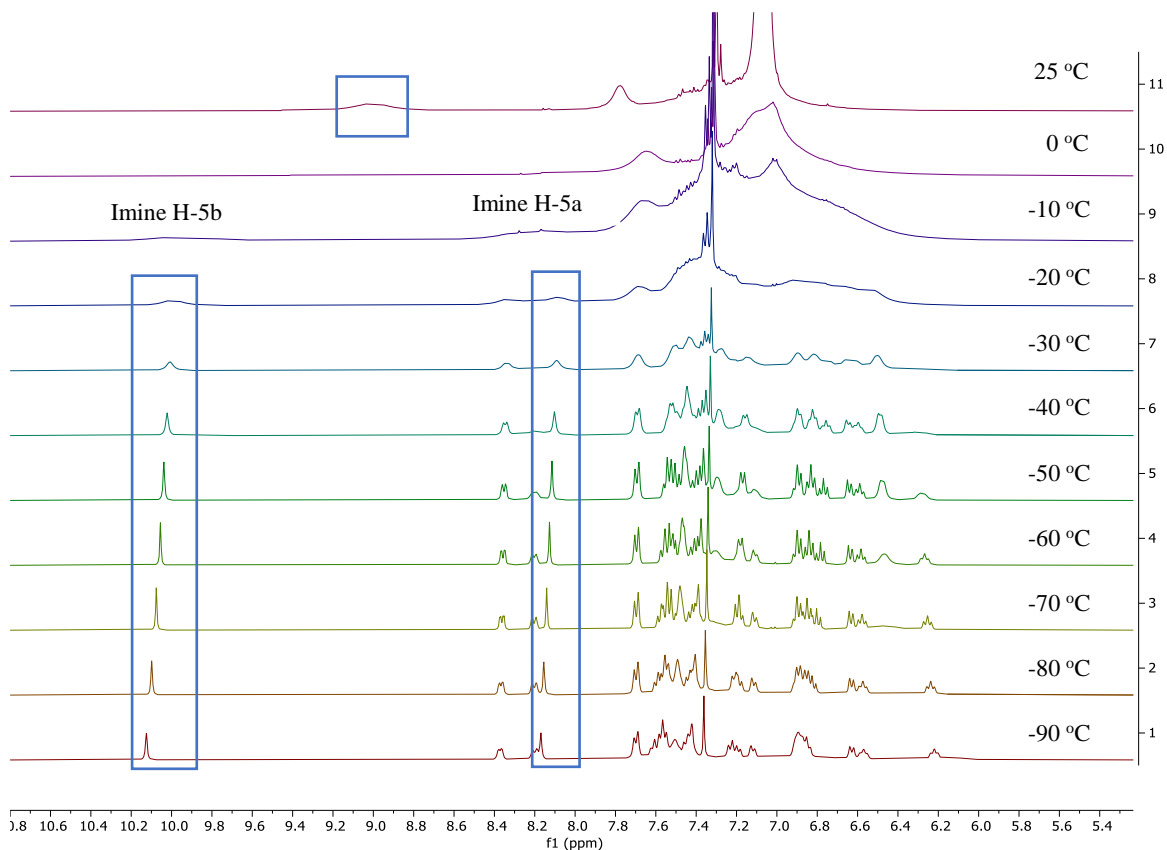

At 25 °C, all <sup>1</sup>H signals are very broad and two imine protons (H-5a and H-5b) are averaged ( $\delta$  9.01 ppm). <sup>1</sup>H signals are even more broadened at 0 °C and gradually sharpen as temperature decreases.

The <sup>1</sup>H NMR at low temperature reveals an asymmetric structure where the two imine protons (H-5a and H-5b) have dramatically different chemical shifts ( $\delta$  8.11 and 10.04 ppm). In comparison to X-ray structure, very high chemical shift of H-5b can be explained by forming a hydrogen bond with one of the two oxo groups. Another imine group is weakly coordinated, and as a result H-5a has a normal chemical shift. The dynamic behavior can be explained by the switch of two imines and bond rotations of *m*-terphenyl groups.

Since most signals are sharp at -50 °C, the <sup>13</sup>C NMR and 2D NMR are recorded at this temperature.

b. Increase of the temperatures (from 25 °C to 60 °C)

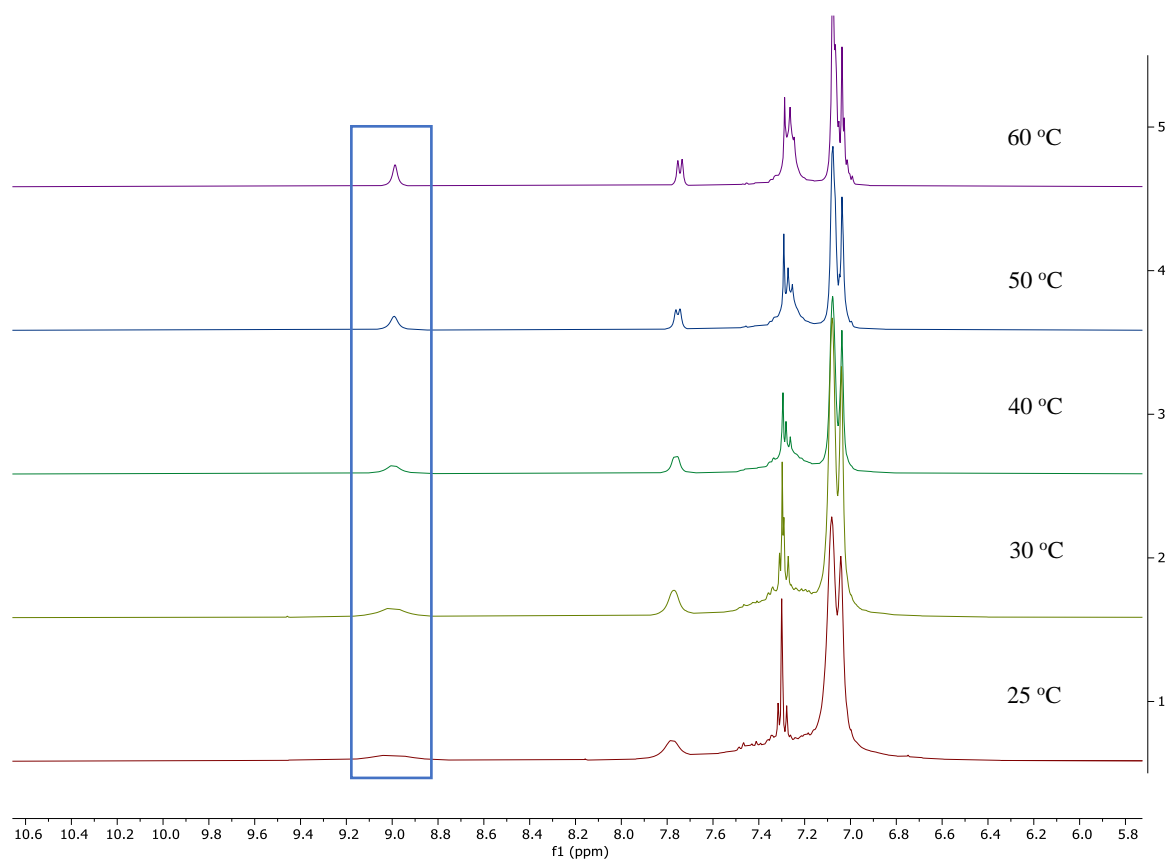

The proton signals also sharpen when the sample were gradually heated. Rapid switch of two imines and bond rotations of *m*-terphenyl groups leads to a simplified <sup>1</sup>H NMR at high temperature. The <sup>13</sup>C NMR and 2D NMR were also recorded at 60 °C.

### HSQC (-50 °C)

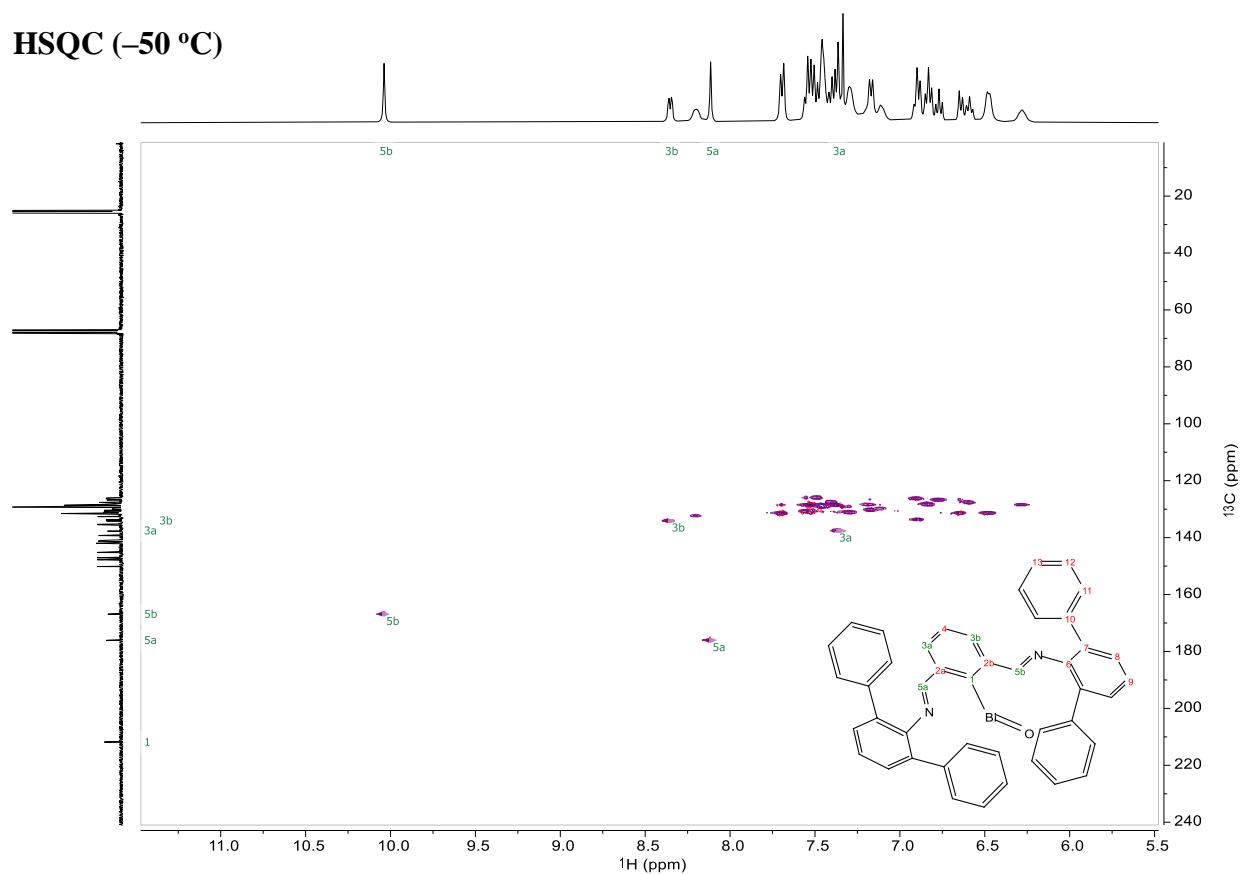

HSQC (-50 °C) reveals that H-5a and H-5b ( $\delta$  8.11 and 10.04 ppm) are attached to C-5a and C-5b ( $\delta$  176.1, 166.9). The imine C-5b is distinctly de-shielded because of the hydrogen bonding.





ROESY (-50 °C)

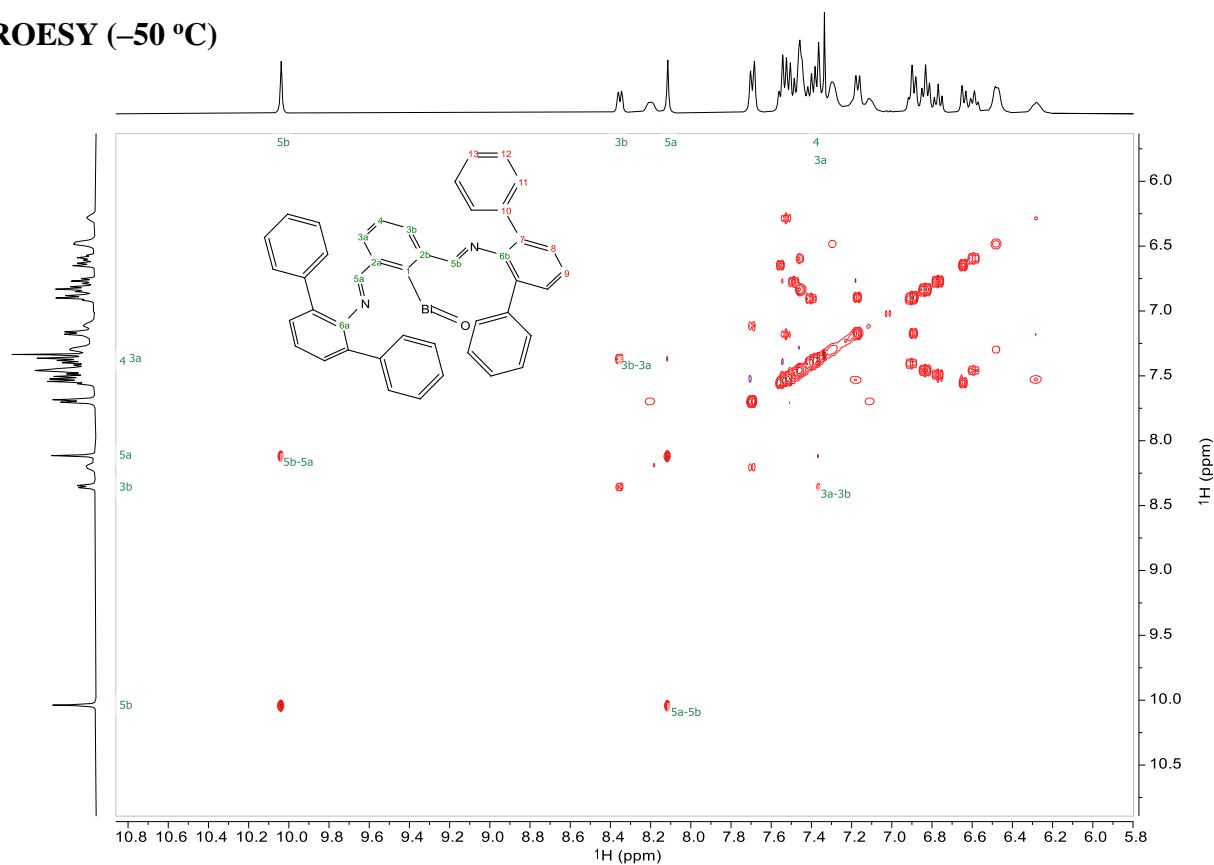

Overall, the ROESY NMR data (-50 °C) reveals a dynamic structure of **4**. Particularly, an chemical exchange cross peak (EXSY peak) is observed between the two imine protons as well between the meta-H of the central Ar-Bi ring, indicating that they are in exchange even at -50 °C.

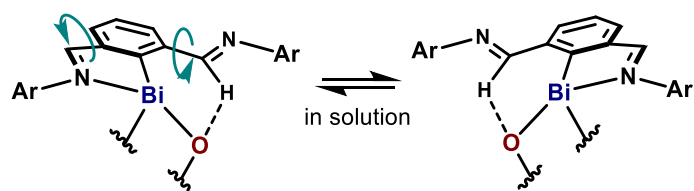

## DOSY (Diffusion-Ordered NMR Spectroscopy) Experiments:

Diffusion coefficients were obtained from a double stimulated echo sequence with bipolar gradient pulses, convection compensation, longitudinal eddy current delay (LED) and three spoiler gradients (Bruker sequence: dstebpgp3s). The gradient pulse strength  $G$  was incremented from 5% to 98% of the maximum  $G_{\max}$  with a linear gradient ramp in 64 steps. For measurements temperatures above 233 K, the diffusion time ( $\Delta$ ) used was 75 ms and the length of a gradient pulse gradient pulse ( $\delta/2$ ) of the encoding gradient was 1.3 ms. For lower temperatures  $\leq 233\text{K}$  a diffusion time  $\Delta = 200$  ms was used. The maximum gradient strength  $G_{\max}$  of the NMR probe (PA BBO 400S1 BBF-H-D-05 Z PLUS) was  $53.5\text{ G}\cdot\text{cm}^{-1}$ . Diffusion coefficients were obtained by averaging three diffusion coefficients obtained from fitting the signal decay of three different resonance integrals to the Stejskal-Tanner equation (1) in the Bruker TOPSPIN T1T2 relaxation module.

$$I(G) = I_0 e^{-D(\gamma G \delta)^2 (\Delta - \delta/3)} \quad (1)$$

Diffusion values were predicted with an EXCEL spreadsheet using the Stokes–Einstein Gierer-Wirtz Estimation (SEGWE) method.<sup>8</sup>

In order to test the SEGWE method, the diffusion coefficients of bismuthinidene **4** were determined at different temperatures and compared to the predicted diffusion coefficients in toluene- $d_8$  (see Table S1). Overall, the predictions were underestimating the experimental diffusion values, but all the results were within 10% of the experimental value.

When a ~50:50 mixture of **4** and mono-organobismuth oxide **6** was analyzed, which was prepared by partial conversion of **4** with  $\text{N}_2\text{O}$ , the measured diffusion coefficient of **4** at 223 K still fits the predicted values for a monomeric species quite well. In contrast to this, the experimental value values for **6** at 223 K [ $(1.02 \pm 0.02) \times 10^{-10}\text{ m}^2/\text{s}$ ] were not matching the prediction for a monomeric species **6** ( $1.39 \times 10^{-10}\text{ m}^2/\text{s}$ ) but the dimeric species ( $1.02 \times 10^{-10}\text{ m}^2/\text{s}$ ). This is in very good agreement with the obtained X-ray structure and supports that organobismuth oxide **6** is a dimer in solution.

When the mixture of **4** and **6** were fully converted to **6**, the measured diffusion coefficients for **6** still agree with the results from the mixture.

Table S1: Overview over all the diffusion experiments

|                                                 |                   | <br>Molecular Weight: 796.73 |                                       |                  |          | <br>Molecular Weight: 812.73 |            |          |                                       |  |  |
|-------------------------------------------------|-------------------|------------------------------|---------------------------------------|------------------|----------|------------------------------|------------|----------|---------------------------------------|--|--|
|                                                 |                   | Dimer                        |                                       |                  |          | Dimer                        |            |          |                                       |  |  |
| MW:                                             |                   | 1593.46 g mol <sup>-1</sup>  |                                       |                  |          | 1625.46 g mol <sup>-1</sup>  |            |          |                                       |  |  |
|                                                 |                   | Monomer                      |                                       |                  |          | Monomer                      |            |          |                                       |  |  |
| MW:                                             |                   | 796.73 g mol <sup>-1</sup>   |                                       |                  |          | 812.73 g mol <sup>-1</sup>   |            |          |                                       |  |  |
|                                                 |                   | Temp                         | D <sub>pred</sub> (m <sup>2</sup> /s) | D <sub>exp</sub> |          |                              |            | Stdev    | $\frac{D_{exp} - D_{pred}}{D_{pred}}$ |  |  |
|                                                 |                   |                              |                                       | D1               | D2       | D3                           | average    |          |                                       |  |  |
| 4                                               |                   | 298K                         | 6.46E-10 ± 1.9E-10                    | 6.92E-10         | 7.14E-10 | 6.81E-10                     | 6.96E-10   | 0.17E-10 | 7.69%                                 |  |  |
|                                                 |                   | 273 K                        | 4.22E-10 ± 1.2E-10                    | 4.62E-10         | 4.58E-10 | 4.50E-10                     | 4.57E-10   | 0.06E-10 | 8.14%                                 |  |  |
|                                                 |                   | 233 K                        | 1.80E-10 ± 5.2E-11                    | 1.91E-10         | 1.93E-10 | 1.89E-10                     | 1.91E-10   | 0.02E-10 | 5.77%                                 |  |  |
|                                                 |                   | 223 K                        | 1.40E-10 ± 4.1E-11                    | 1.40E-10         | 1.41E-10 | 1.47E-10                     | 1.43E-10   | 0.04E-10 | 2.19%                                 |  |  |
| Mixture of 4 and 6                              | SM - Monomer      | 223                          | 1.40E-10 ± 4.1E-11                    | 1.40E-10         | 1.35E-10 |                              | 1.38E-10   | 0.04E-10 | -1.50%                                |  |  |
|                                                 | SM - Dimer        |                              | 1.03E-10 ± 3.0E-11                    | 1.4E-10          | 1.35E-10 |                              | 1.38E-10   | 0.04E-10 | 34.10%                                |  |  |
|                                                 | Produkt - Monomer |                              | 1.39E-10 ± 4.0E-11                    | 1.01E-10         | 1.02E-10 | 1.04E-10                     | 1.02E-10   | 0.02E-10 | -26.23%                               |  |  |
|                                                 | Produkt - Dimer   |                              | 1.02E-10 ± 3.0E-11                    | 1.01E-10         | 1.02E-10 | 1.043E-10                    | 1.02E-10   | 0.02E-10 | 0.39%                                 |  |  |
|                                                 | SM - Monomer      | 233                          | 1.80E-10 ± 5.2E-11                    | 1.92E-10         | 1.83E-10 |                              | 1.872E-10  | 0.06E-10 | 3.69%                                 |  |  |
|                                                 | SM - Dimer        |                              | 1.33E-10 ± 3.8E-11                    | 1.92E-10         | 1.83E-10 |                              | 1.8715E-10 | 0.06E-10 | 41.17%                                |  |  |
|                                                 | Produkt - Monomer |                              | 1.79E-10 ± 5.2E-11                    | 1.35E-10         | 1.44E-10 | 1.44E-10                     | 1.410E-10  | 0.05E-10 | -21.17%                               |  |  |
|                                                 | Produkt - Dimer   |                              | 1.31E-10 ± 3.8E-11                    | 1.35E-10         | 1.44E-10 | 1.438E-10                    | 1.41E-10   | 0.05E-10 | 7.28%                                 |  |  |
| 6 (fully converted from the mixture of 4 and 6) | Produkt - Monomer | 233                          | 1.79E-10 ± 5.2E-11                    | 1.40E-10         | 1.44E-10 | 1.43E-10                     | 1.41E-10   | 0.02E-10 | -21.17%                               |  |  |
|                                                 | Produkt - Dimer   |                              | 1.31E-10 ± 3.8E-11                    | 1.4E-10          | 1.44E-10 | 1.426E-10                    | 1.41E-10   | 0.02E-10 | 7.28%                                 |  |  |

### NMR Monitoring:

NMR monitoring was performed for a toluene-*d*<sub>8</sub> solution of **4** in a N<sub>2</sub>O-filled J-Young NMR tube, however, the reaction proceeded very slowly in the NMR tube while standing still. The reaction was accelerated by gently shaking the NMR tube. After each shake, a <sup>1</sup>H NMR spectrum was recorded. According to NMR monitoring, no intermediate (proposed monomeric oxobismuth species) was detected, which indicated the dimerization after N<sub>2</sub>O oxidation is a fast process.

#### 4.3. N<sub>2</sub>O Oxidation of Bismuthinidene (**5**): the Formation of Bismuth Hydroxide (**7**)

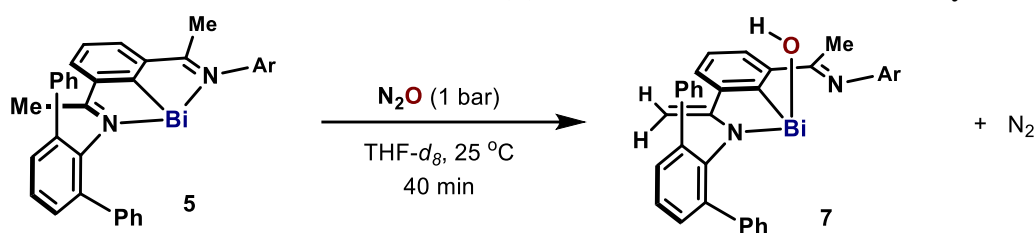

*NMR study:* in a glove box, bismuthinidene (**5**) (20.0 mg, 0.0238 mmol) and THF-*d*<sub>8</sub> (0.8 mL) were added to an oven-dried 10 mL pressure Schlenk tube fitted with a J-Young valve. The Schlenk tube was taken out of the glove box and connected to a Schlenk line and a N<sub>2</sub>O bottle via a three-way tubing system. The system was degassed by freeze-pump-thaw, backfilled with N<sub>2</sub>O (1 bar) and stirred at 25 °C for 40 min, during which slow formation of N<sub>2</sub> was observed and the color of the solution changed gradually from dark purple-red into orange-red. The solution was transferred into a J-Young NMR tube in the glove box for the NMR study.

*Preparative reaction:* in a glove box, bismuthinidene (**5**) (150 mg, 0.182 mmol) and dry THF (7 mL) were added to an oven-dried 100 mL pressure Schlenk flask fitted with a J-Young valve. The Schlenk flask was taken out of the glove box and connected to a Schlenk line and a N<sub>2</sub>O bottle via a three-way tubing system. The system was degassed by freeze-pump-thaw, backfilled with N<sub>2</sub>O (1 bar). The reaction mixture was stirred at 25 °C for 45 min until a clear orange-red solution formed. After the removal of THF *in vacuo*, the crude product was washed with dry *n*-pentane on a fritted glass filter under argon and dried under high vacuum, giving bismuth hydroxide (**7**) as an orange-yellow powder (142 mg, 93%).



# $^1\text{H}$ - $^1\text{H}$ COSY

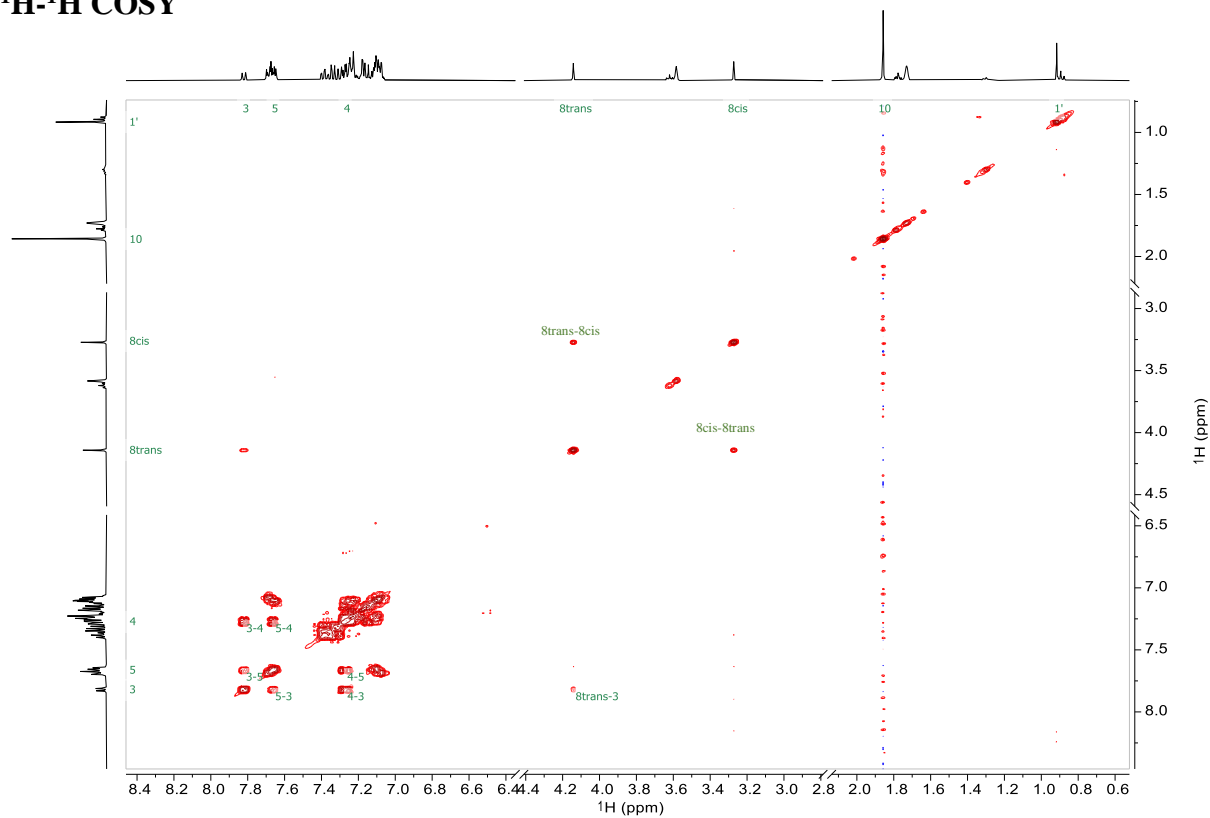

The coupling between H-8cis/trans is observed in  $^1\text{H}$ - $^1\text{H}$  COSY, although this germinal coupling is too weak to be observed in  $^1\text{H}$  NMR.

## Edited-HSQC

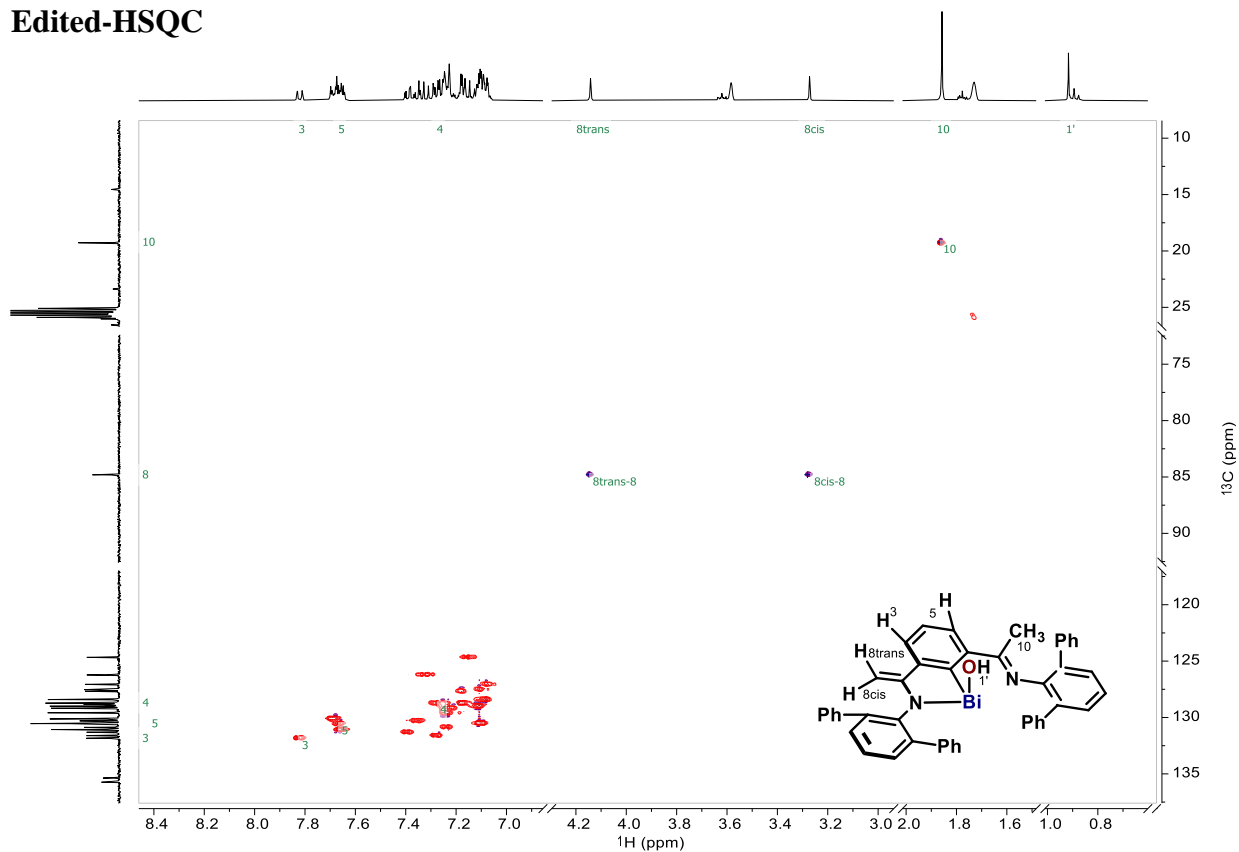

The DEPT135-edited-HSQC shows that  $\text{H}^{8\text{cis}}$  and  $\text{H}^{8\text{trans}}$  are attached to the same carbon C-8 as indicated by the opposite phase of the signals compared to all other carbons in the molecule while  $\text{H}^{10}$ s belong to  $\text{CH}_3$ .  $\text{H}^{1'}$  (OH) has no correlation with any carbon.

# HMBC

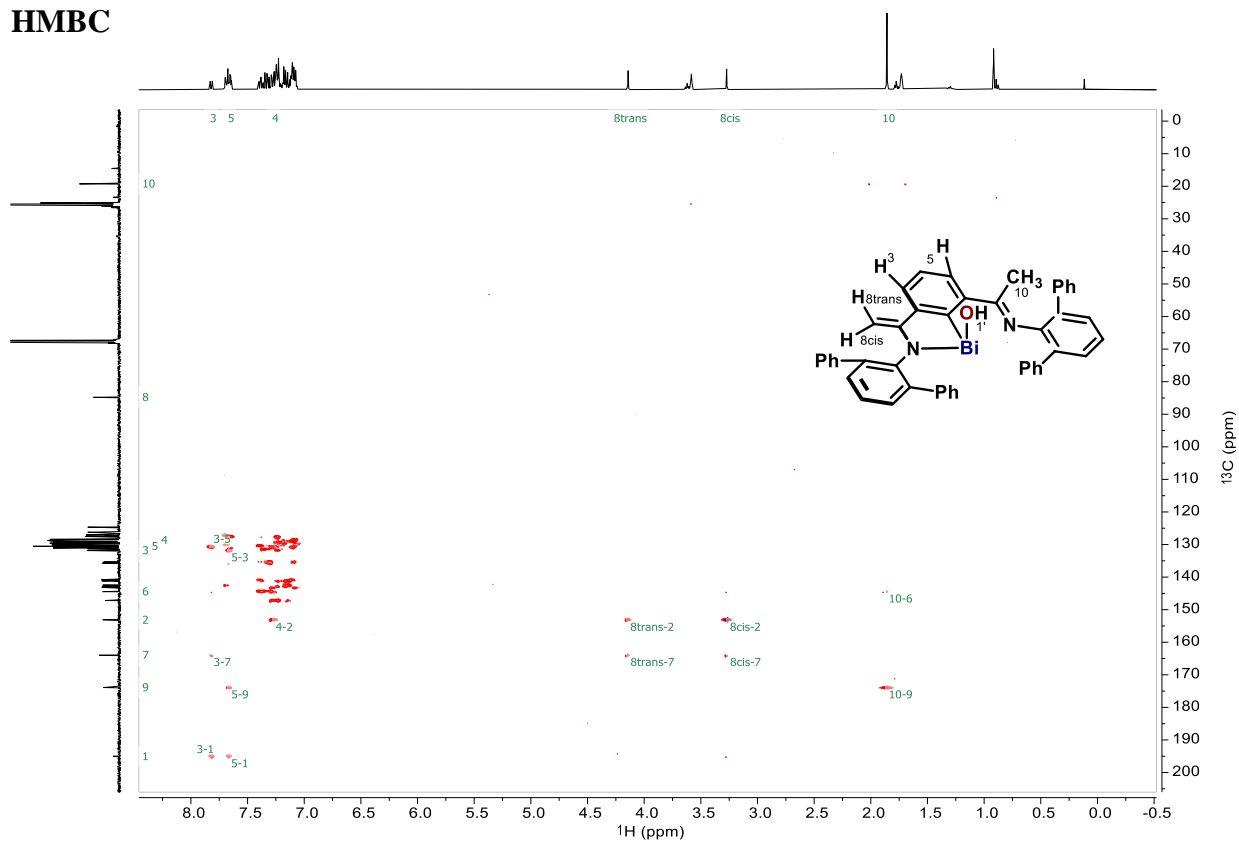

HMBC further confirms the nature of  $\text{CH}_2$  (attaching to enamine) and  $\text{CH}_3$  (attaching to imine).



## ROESY

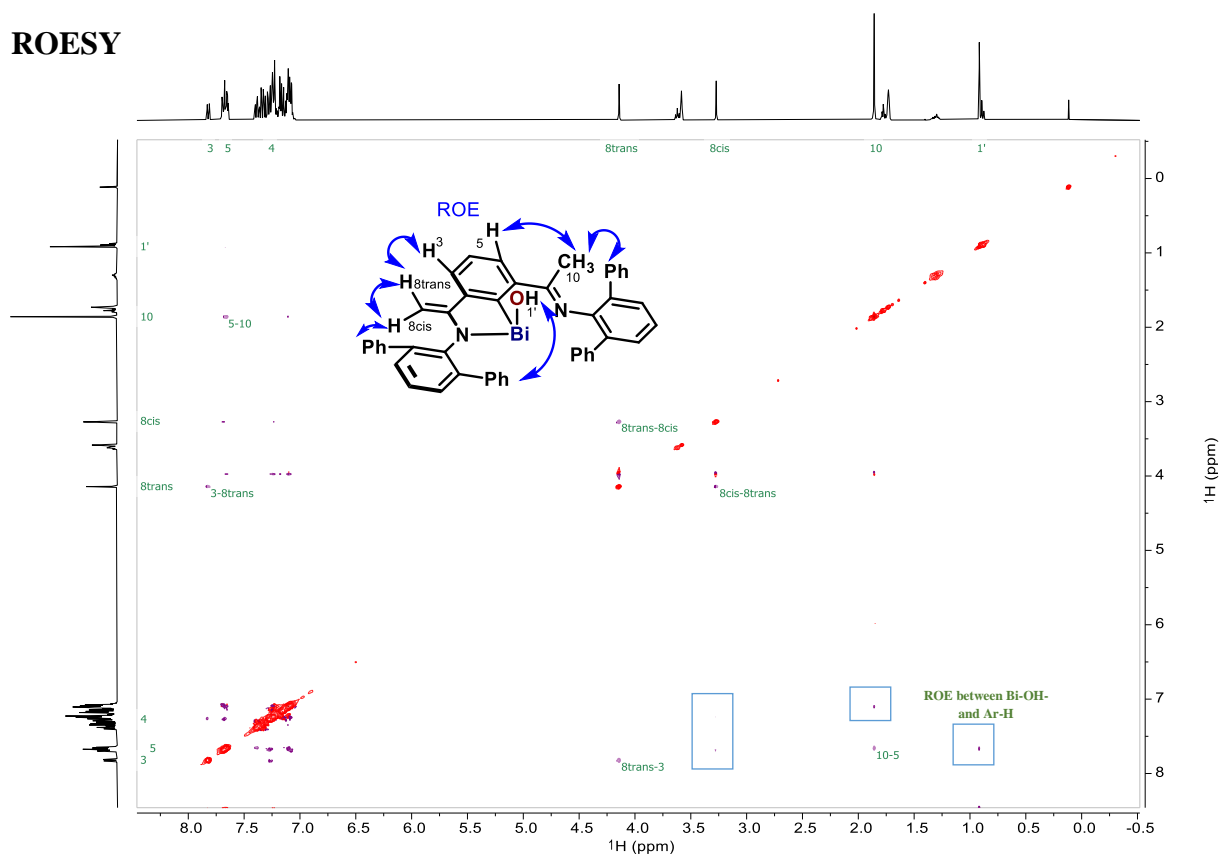

Multiple ROE cross peaks and the absence of EXSY peaks reveal that **7** has a rather non-dynamic structure. All ROE correlations are consistent with the structural information in the X-ray.

### NMR Monitoring:

NMR monitoring was performed for a THF-*d*<sub>8</sub> solution of **5** in a N<sub>2</sub>O-filled J-Young NMR tube, however, the reaction proceeded very slowly in the NMR tube while standing still. The reaction was accelerated by gently shaking the NMR tube. After each shake, a <sup>1</sup>H NMR spectrum was recorded. According to NMR monitoring, no intermediate (proposed monomeric oxobismuth species) was detected, which indicated the tautomerization after N<sub>2</sub>O oxidation is a fast process.

## 5. HBpin Reduction of 6 and 7

### 5.1. HBpin Reduction of Dimeric Bismuth Oxide (6)

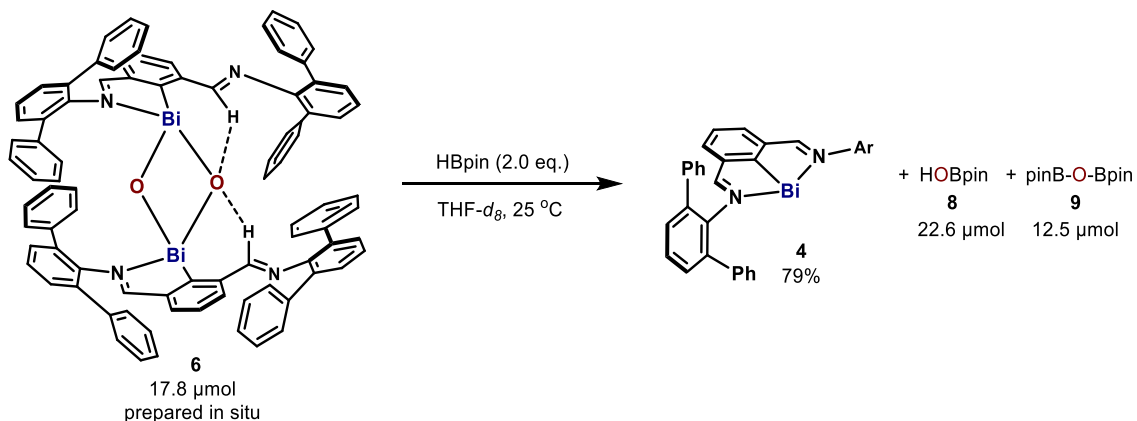

Due to its instability in solid state, a 1 mL THF- $d_8$  solution of **6** (17.8  $\mu\text{mol}$ , 0.5 equiv.) was prepared *in situ* by  $\text{N}_2\text{O}$  oxidation of **4** (28.4 mg, 35.7  $\mu\text{mol}$ , 1.0 equiv.). After oxidation, the excess of  $\text{N}_2\text{O}$  was removed *in vacuo*.

In the glove box, a 250  $\mu\text{L}$  THF- $d_8$  solution of HBpin (10.4  $\mu\text{L}$ , 2.0 equiv., 71.4  $\mu\text{mol}$ ) was added *slowly and dropwise* to **6** solution *under rapid stirring*. The pale yellow solution turned into dark purple immediately. After stirring for 5 min, mesitylene (5.0  $\mu\text{L}$ , 1.0 equiv., 35.7  $\mu\text{mol}$ ) was added as internal standard and the solution was transferred into a J-Young NMR tube for NMR study.

$^1\text{H}$  NMR (THF- $d_8$ , 500 MHz)

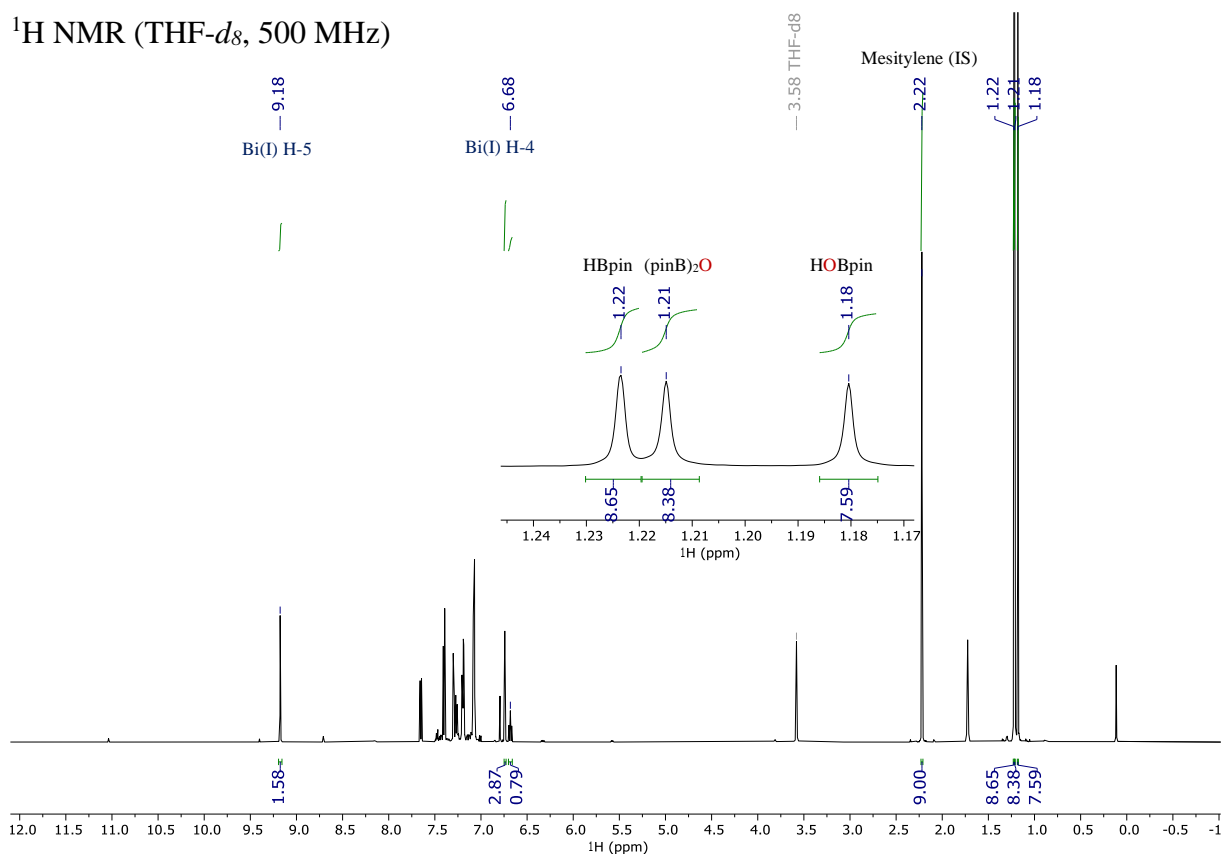

$^{11}\text{B}$  NMR (THF- $d_8$ , 160 MHz)

— 28.02

— 22.34

— 21.17

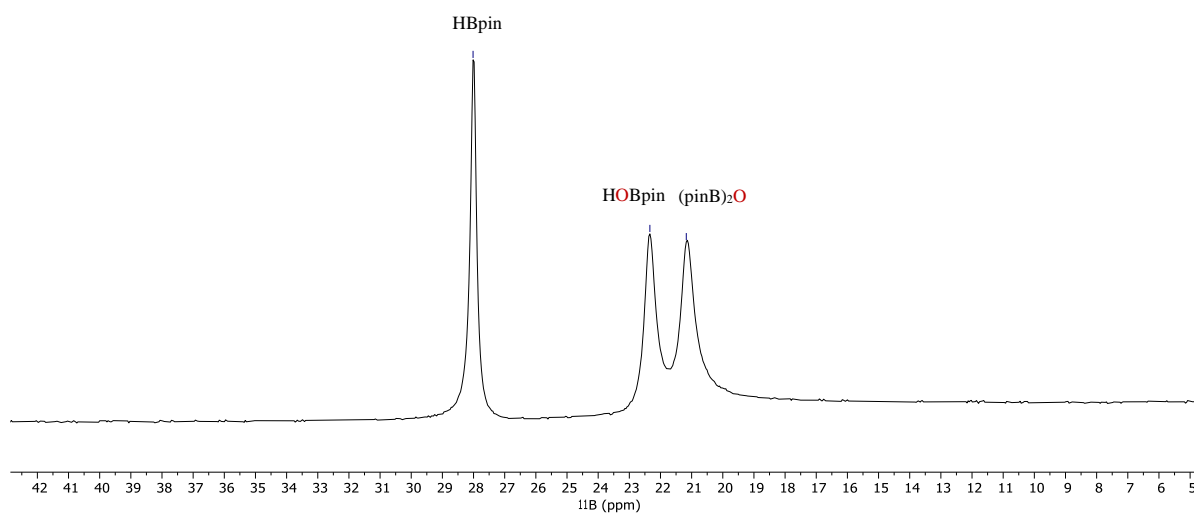

Pure bismuthinidene (**4**)

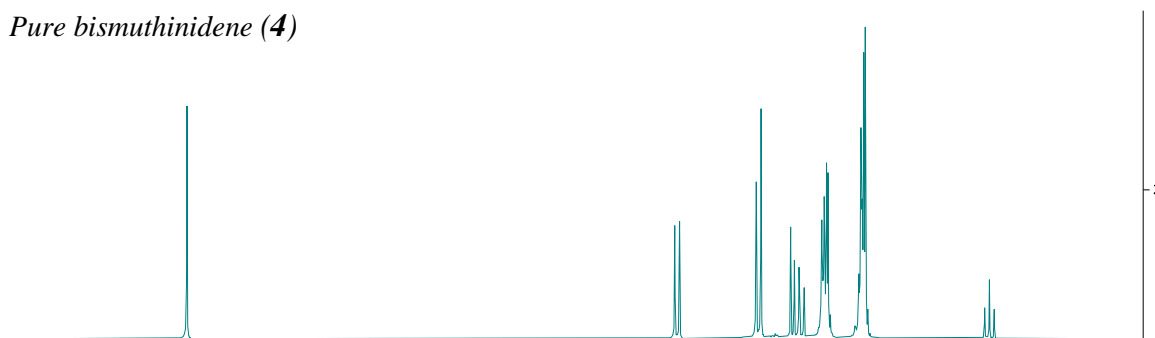

$^1\text{H}$  NMR after HBpin reduction

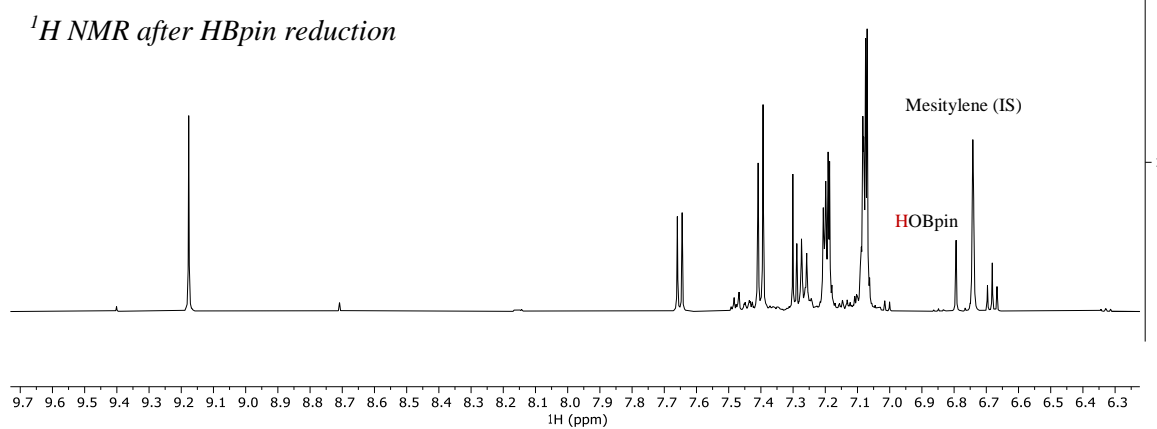

Bismuthinidene (**4**) formed in 79% yield during HBpin reduction, accompanied with the formation of HOBpin (**8**, 22.6  $\mu\text{mol}$ ) and (pinB) $_2$ O (**9**, 12.5  $\mu\text{mol}$ ). The results confirmed that

the stoichiometry of the oxygen transfer reaction between bismuth oxide (**6**) and HBpin was 1:2. The rest of bismuth oxide (**6**) was converted into black precipitate. The fast and unselective reduction at high concentration might lead to relatively low yield of bismuthinidene (**4**) in stoichiometric reduction.

After 4 days, NMR data of the sample was recorded again and 0.73 equiv. bismuthinidene (**4**) remained, indicating that bismuthinidene (**4**) was stable at the reaction condition (HBpin and products).



$^{11}\text{B}$  NMR (THF- $d_8$ , 160 MHz)

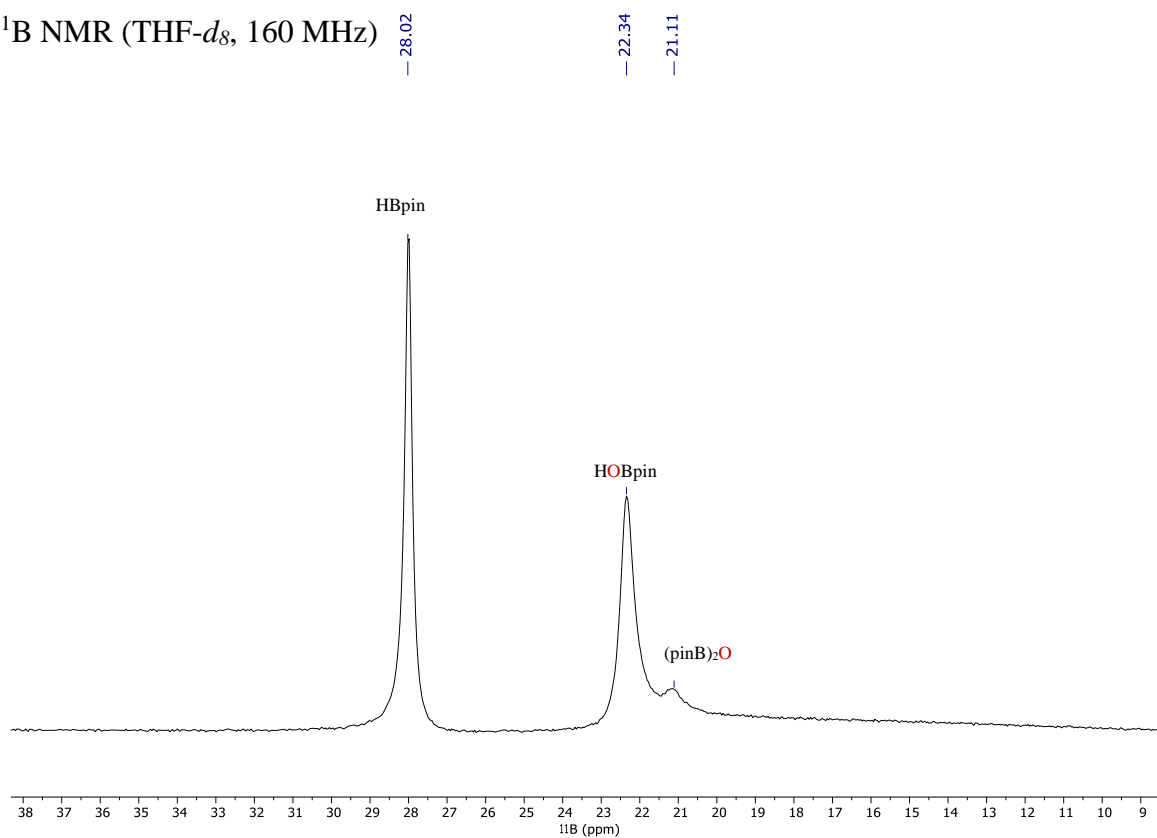

Pure bismuthinidene (**5**)

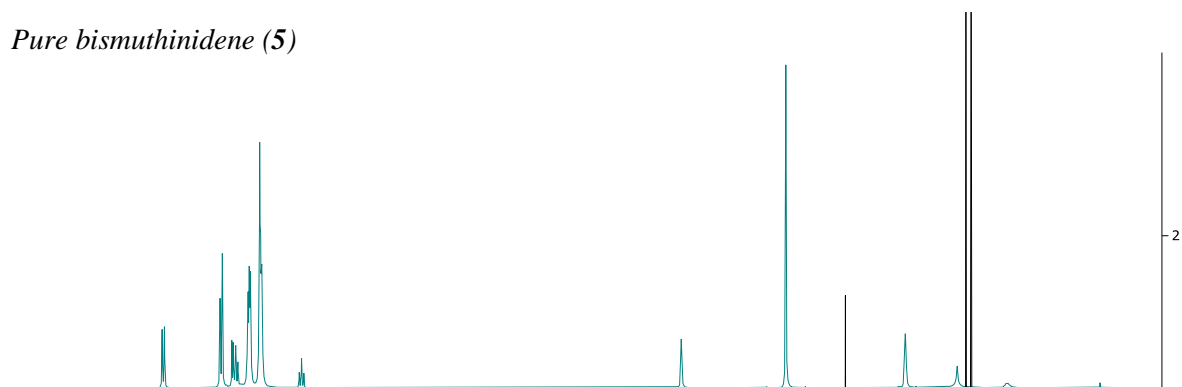

$^1\text{H}$  NMR after HBpin reduction

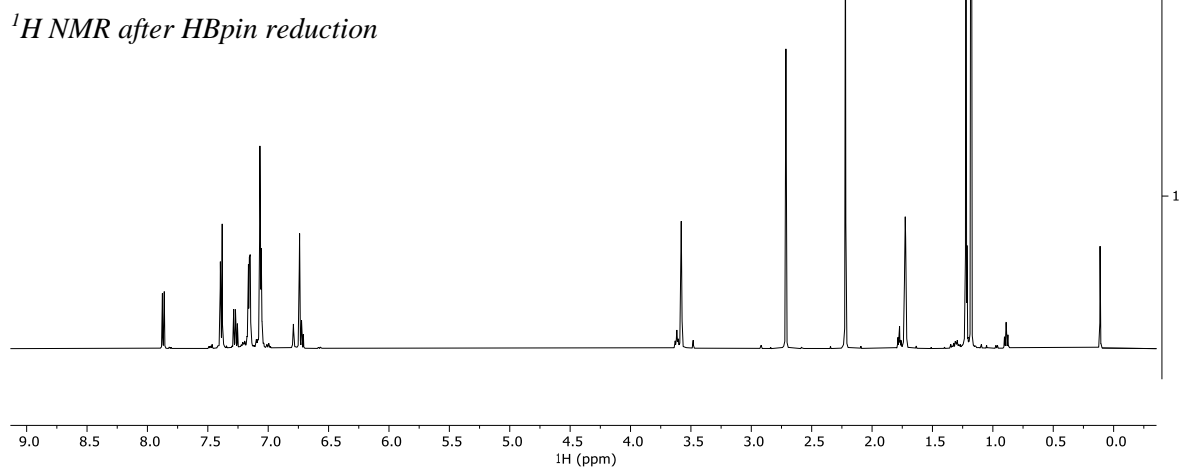

Bismuthinidene (**5**) formed in 78% yield during HBpin reduction, accompanied with the formation of HOBpin (**8**, 30.4  $\mu\text{mol}$ ) and (pinB) $_2$ O (**9**, 1.7  $\mu\text{mol}$ ). The results confirmed that

the stoichiometry of the oxygen transfer reaction between bismuth oxide (**7**) and HBpin was 1:1. The rest of bismuth oxide (**7**) was converted into black precipitate. *Since the free ligand is not detected in <sup>1</sup>H NMR, this black precipitate is more likely dimerized or oligomerized Bi(I) instead of metallic Bi.* The fast and unselective reduction at high concentration might lead to relatively low yield of bismuthinidene (**5**) in stoichiometric reduction. This assumption was supported by the fact that direct addition of undiluted HBpin afforded lower yield of bismuthinidene (**5**) (65%) and more black precipitate.

After 4 days, a NMR data of the sample was recorded again and no change of the amount of bismuthinidene (**5**) in solution was observed, indicating that bismuthinidene (**5**) was stable at the reaction condition (HBpin and products).

## 6. Catalytic N<sub>2</sub>O Deoxygenation

### 6.1. Characterization of Products **8** and **9**

HOBpin (**8**)<sup>9</sup> and (pinB)<sub>2</sub>O (**9**)<sup>10</sup> have been characterized in the previous literature, however, the data in THF-*d*<sub>8</sub> has not been reported. Herein, the NMR characterization of HOBpin (**8**) and (pinB)<sub>2</sub>O (**9**) were reported and in THF-*d*<sub>8</sub>.

4,4,5,5-tetramethyl-1,3,2-dioxaborolan-2-ol (**8**)

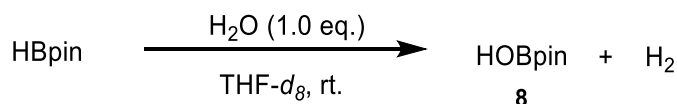

Procedure: in a glove box, HBpin (0.4 mmol, 58.0 μL) and THF-*d*<sub>8</sub> (0.6 mL) were added to a 10 mL vial. H<sub>2</sub>O (degassed, 7.2 μL, 1.0 equiv.) was added to the solution outside the glove box. The solution was stirred at room temperature for 1 h, during which continuous formation of H<sub>2</sub> was observed. After reaction, the solution was diluted and transferred into a J-Young NMR tube in the glove box for NMR characterization.

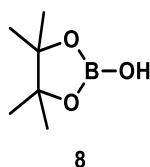

<sup>1</sup>H NMR (500 MHz, THF-*d*<sub>8</sub>): δ 6.80 (s, 1H, OH), 1.18 (s, 12H, CH<sub>3</sub>).

<sup>13</sup>C NMR (126 MHz, THF-*d*<sub>8</sub>): δ 82.4 (C<sub>q</sub>), 25.2 (CH<sub>3</sub>).

<sup>11</sup>B NMR (160 MHz, THF-*d*<sub>8</sub>): δ 22.3.

2,2'-oxybis(4,4,5,5-tetramethyl-1,3,2-dioxaborolane) (**9**)

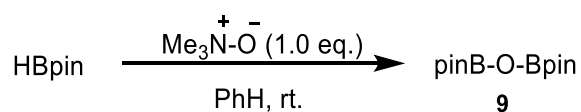

(pinB)<sub>2</sub>O was prepared by the literature method with modifications.<sup>10</sup>

Procedure: to an oven-dried 50 mL Schlenk flask, trimethylamine *N*-oxide (130 mg, 1.73 mmol, 1.0 equiv.) and anhydrous benzene (10 mL) were added under argon. To this suspension, HBpin (251 μL, 1.73 mmol) was slowly added. The reaction mixture was stirred 4 h. Then, the solution was frozen and benzene and trimethylamine were removed *in vacuo* and the resulting white solid was dried under high vacuum for 10 h. (pinB)<sub>2</sub>O was isolated as a white solid in 95% yield (440 mg).



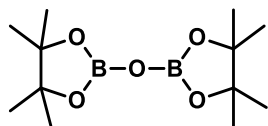

9

**$^1\text{H}$  NMR (500 MHz, THF-*d*<sub>8</sub>):**  $\delta$  1.21 (s, 12H).

**$^{13}\text{C}$  NMR (126 MHz, THF-*d*<sub>8</sub>):**  $\delta$  83.5 (C<sub>q</sub>), 25.0 (CH<sub>3</sub>).

**$^{11}\text{B}$  NMR (160 MHz, THF-*d*<sub>8</sub>):**  $\delta$  21.1.

## 6.2. General Procedure for Catalytic N<sub>2</sub>O Deoxygenation

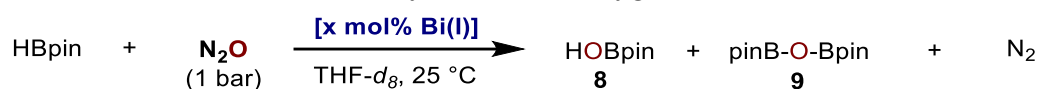

In a glove box, mesitylene (20.9  $\mu\text{L}$ , 0.15 mmol, 1.0 equiv.), THF-*d*<sub>8</sub> and HBpin (21.8  $\mu\text{L}$ , 0.15 mmol) were added successively to a 10 mL pressure Schlenk tube fitted with a J-Young valve. And then corresponding Bi(I) catalyst (THF-*d*<sub>8</sub> stock solution) was added. The total amount of THF-*d*<sub>8</sub> was 0.8 mL. The Schlenk tube was taken out of the glove box and connected to a Schlenk line and a N<sub>2</sub>O bottle via a three-way tubing system. The system was degassed by freeze-pump-thaw, backfilled with N<sub>2</sub>O (1 bar) and rapidly stirred (750 rpm), during which formation of N<sub>2</sub> was observed. The ending point of the reaction was judged by the disappearance of characteristic color of Bi(I) catalyst or the formation of black precipitate. The solution was transferred into a J-Young NMR tube in the glove box for the NMR study.

### 6.3. Table S2: Catalytic N<sub>2</sub>O Deoxygenation with HBpin

Because the product HOBpin (**8**) reacted with HBpin to give (pinB)<sub>2</sub>O (**9**), the TONs are always lower than theoretical TON [1/cat. (%)] even though full conversions were achieved in most cases.

$$\text{TON} = [\text{HOBpin} (\%) + (\text{pinB})_2\text{O} (\%)] \times [1/\text{cat.} (\%)]$$

$$\text{TOF} = \text{TON}/\text{time} (\text{min})$$

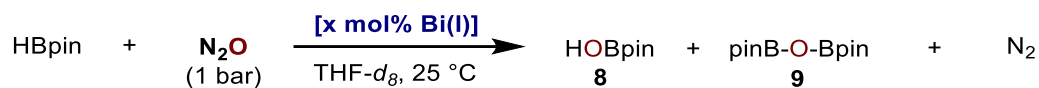

Table S2: Catalytic N<sub>2</sub>O deoxygenation with HBpin<sup>a</sup>

| Entry | Bi(I) (mol%)    | Time                  | Conv. (%) <sup>b</sup> | <b>8</b> (%) | <b>9</b> (%) | TON  | TOF                    |
|-------|-----------------|-----------------------|------------------------|--------------|--------------|------|------------------------|
| 1     | ---             | 15 h                  | 0                      | ---          | ---          | ---  | ---                    |
| 2     | <b>4</b> (1.0)  | 15 h                  | 79                     | 27           | 27           | 54   | ---                    |
| 3     | <b>5</b> (1.0)  | 15 h                  | 100                    | 79           | 10           | 89   | ---                    |
| 4     | <b>1</b> (2.5)  | < 1 min <sup>c</sup>  | 100                    | 58           | 18           | 30   | > 30 min <sup>-1</sup> |
| 5     | <b>1</b> (1.0)  | ~ 3 min <sup>c</sup>  | 100                    | 60           | 20           | 80   | ~ 27 min <sup>-1</sup> |
| 6     | <b>1</b> (0.5)  | ~ 5 min <sup>c</sup>  | 100                    | 62           | 20           | 162  | ~ 32 min <sup>-1</sup> |
| 7     | <b>1</b> (0.1)  | ~ 15 min <sup>c</sup> | 100                    | 57           | 21           | 780  | ~ 52 min <sup>-1</sup> |
| 8     | <b>1</b> (0.05) | ~ 30 min <sup>c</sup> | 100                    | 53           | 23           | 1520 | ~ 51 min <sup>-1</sup> |
| 9     | <b>1</b> (0.01) | 11 h                  | 97                     | 36           | 31           | 6700 | ---                    |

<sup>a</sup>Yields and TONs calculated by <sup>1</sup>H NMR using mesitylene as internal standard. <sup>b</sup>Based on HBpin. <sup>c</sup>Determined by disappearance of the characteristic color of Bi(I).

## 6.4. NMR Spectra of Catalytic N<sub>2</sub>O Deoxygenation

- Blank Reaction

<sup>1</sup>H NMR (THF-*d*<sub>8</sub>, 500 MHz)

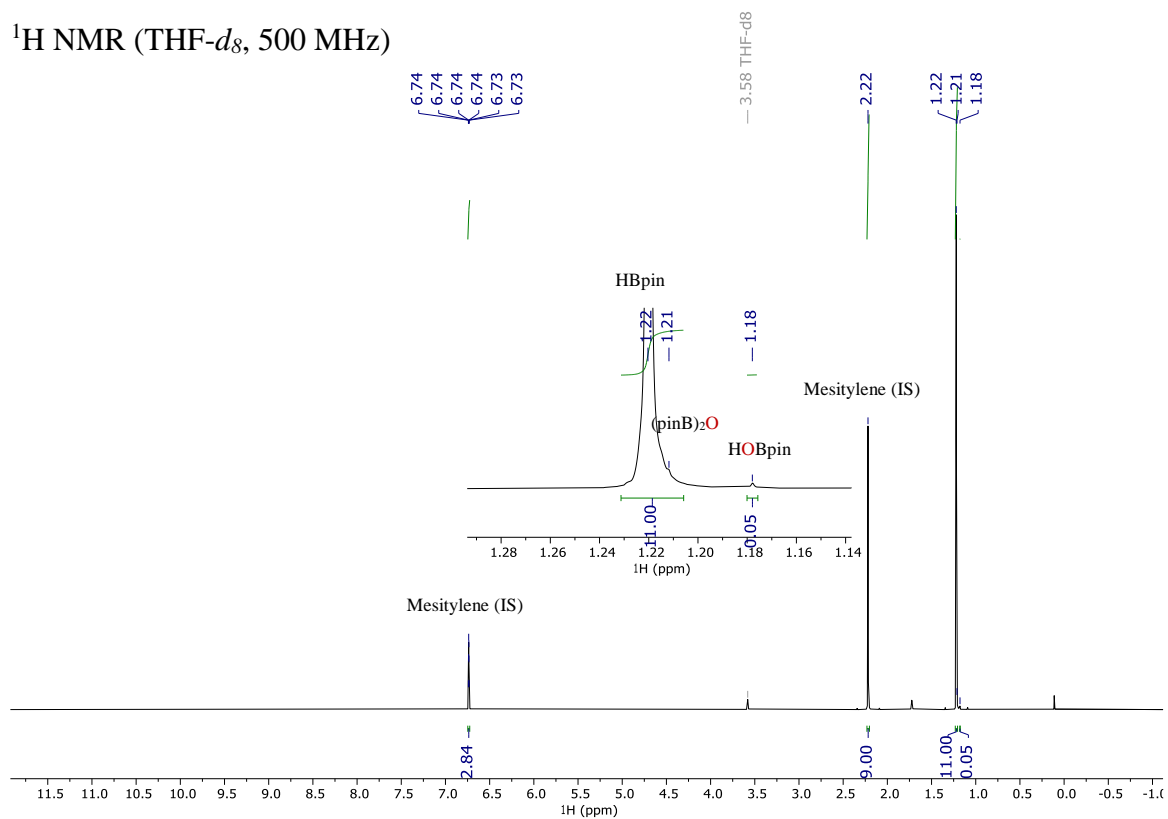

$^{11}\text{B}$  NMR (THF- $d_8$ , 160 MHz)

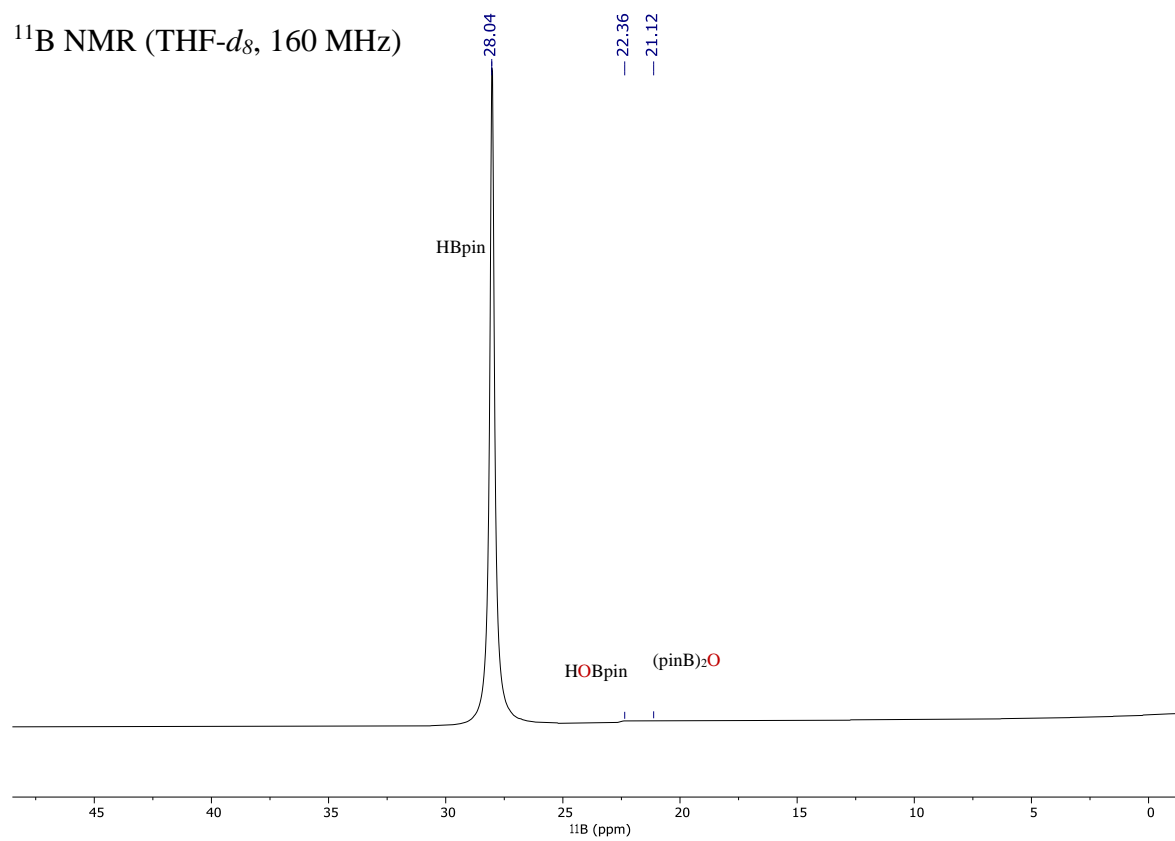

- Catalytic N<sub>2</sub>O Deoxygenation by Bismuthinidene (**4**)

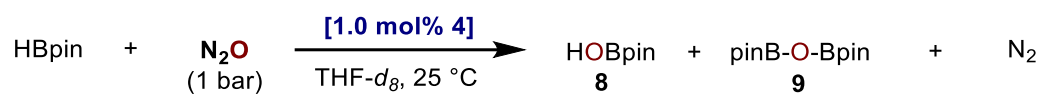

The stock solution was prepared by dissolving 4.8 mg bismuthinidene (**4**) in 1.0 mL THF-*d*<sub>8</sub> and 250 μL of this solution was used for each reaction. The conversion, yields and TONs were calculated by <sup>1</sup>H NMR integration relative to the mesitylene as internal standard, from an average of three independent reactions.

Slow N<sub>2</sub> formation was observed during the reaction. The solution remained dark purple until black precipitate formed after about 4 h.

$^1\text{H}$  NMR (THF- $d_8$ , 500 MHz)

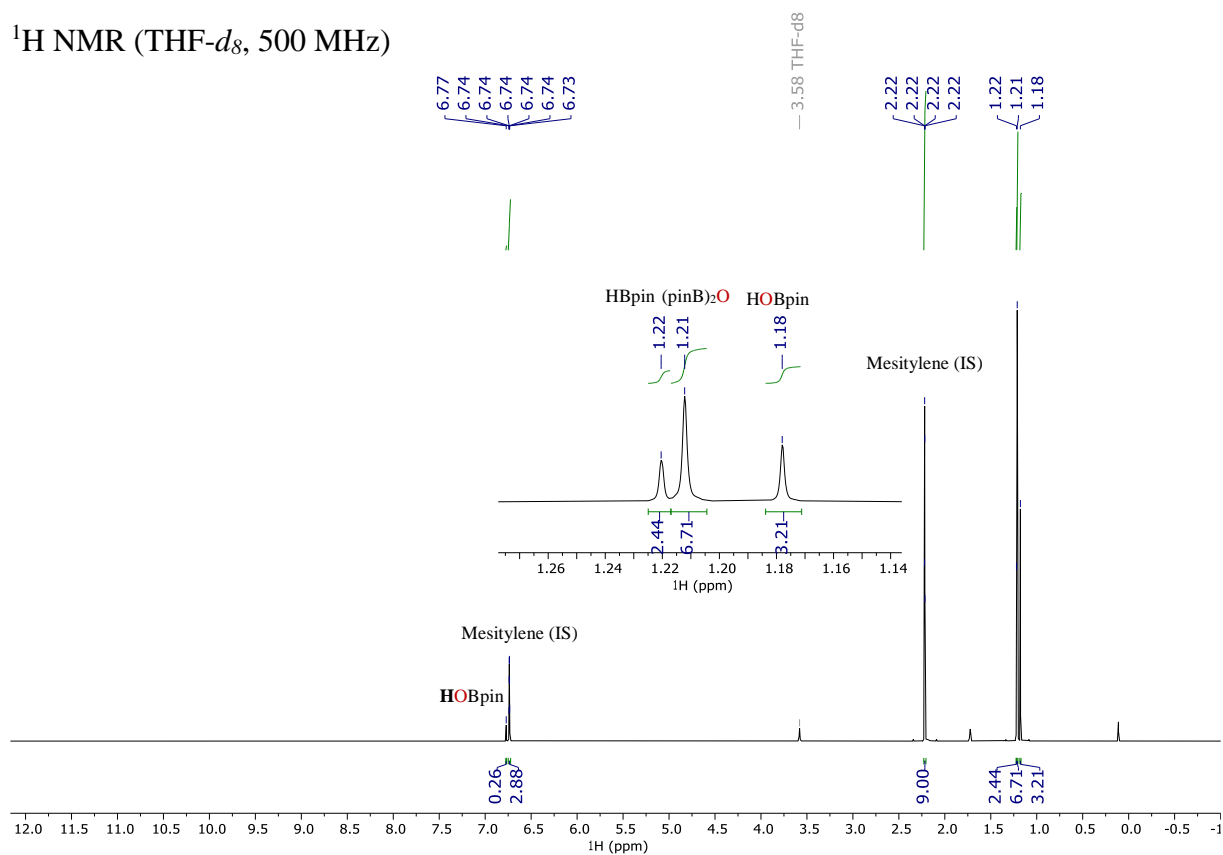

$^{11}\text{B}$  NMR (THF- $d_8$ , 160 MHz)

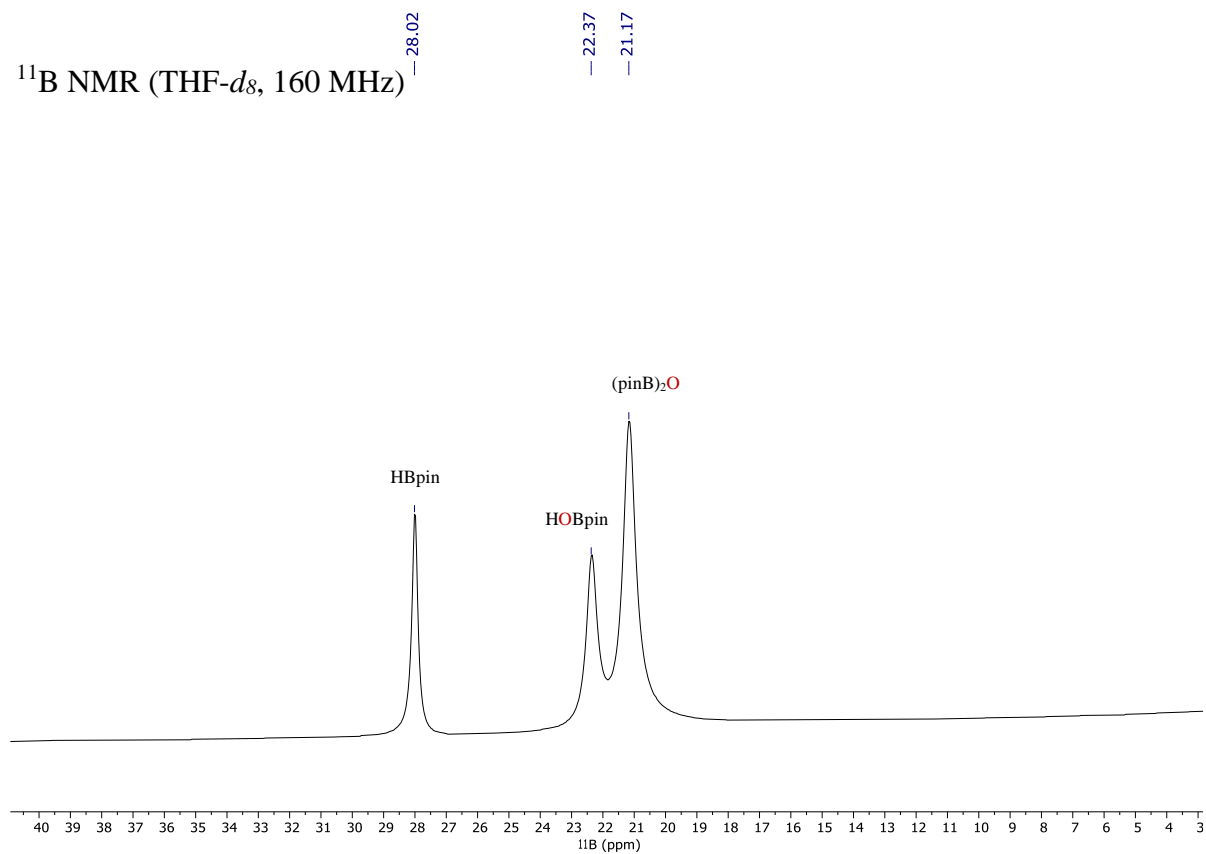

- Catalytic N<sub>2</sub>O Deoxygenation by Bismuthinidene (**5**)

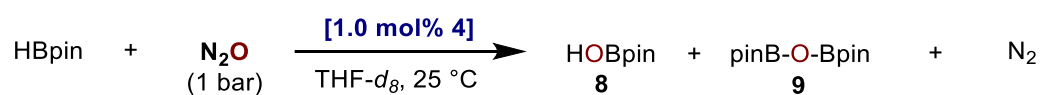

The stock solution was prepared by dissolving 5.0 mg bismuthinidene (**5**) in 1.0 mL THF-*d*<sub>8</sub> and 250 μL of this solution was used for each reaction. The conversion, yields and TON were calculated by <sup>1</sup>H NMR integration relative to the mesitylene as internal standard, from an average of three independent reactions.

Slow N<sub>2</sub> formation was observed during the reaction. The solution remained dark red-purple until black precipitate formed after about 4 h.



$^1\text{H}$  NMR (THF- $d_8$ , 500 MHz)

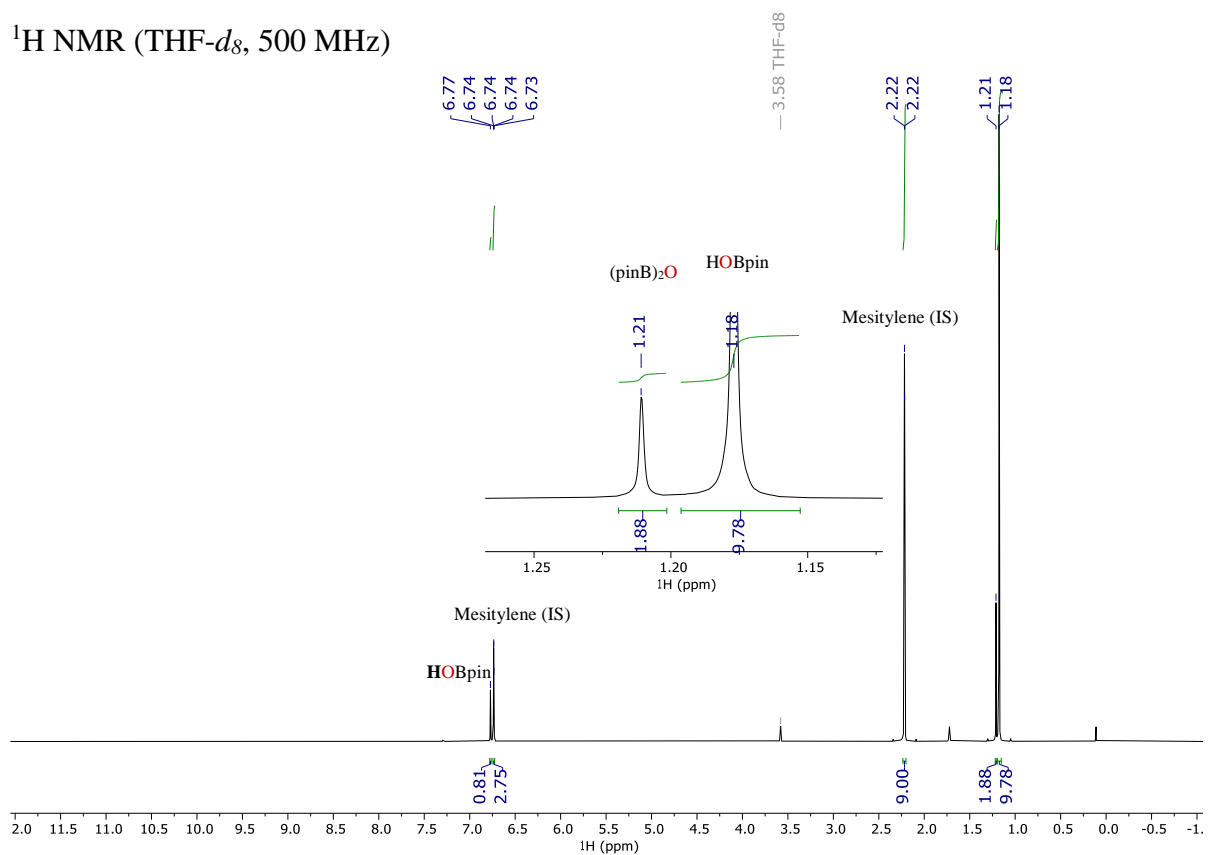

$^{11}\text{B}$  NMR (THF- $d_8$ , 160 MHz)

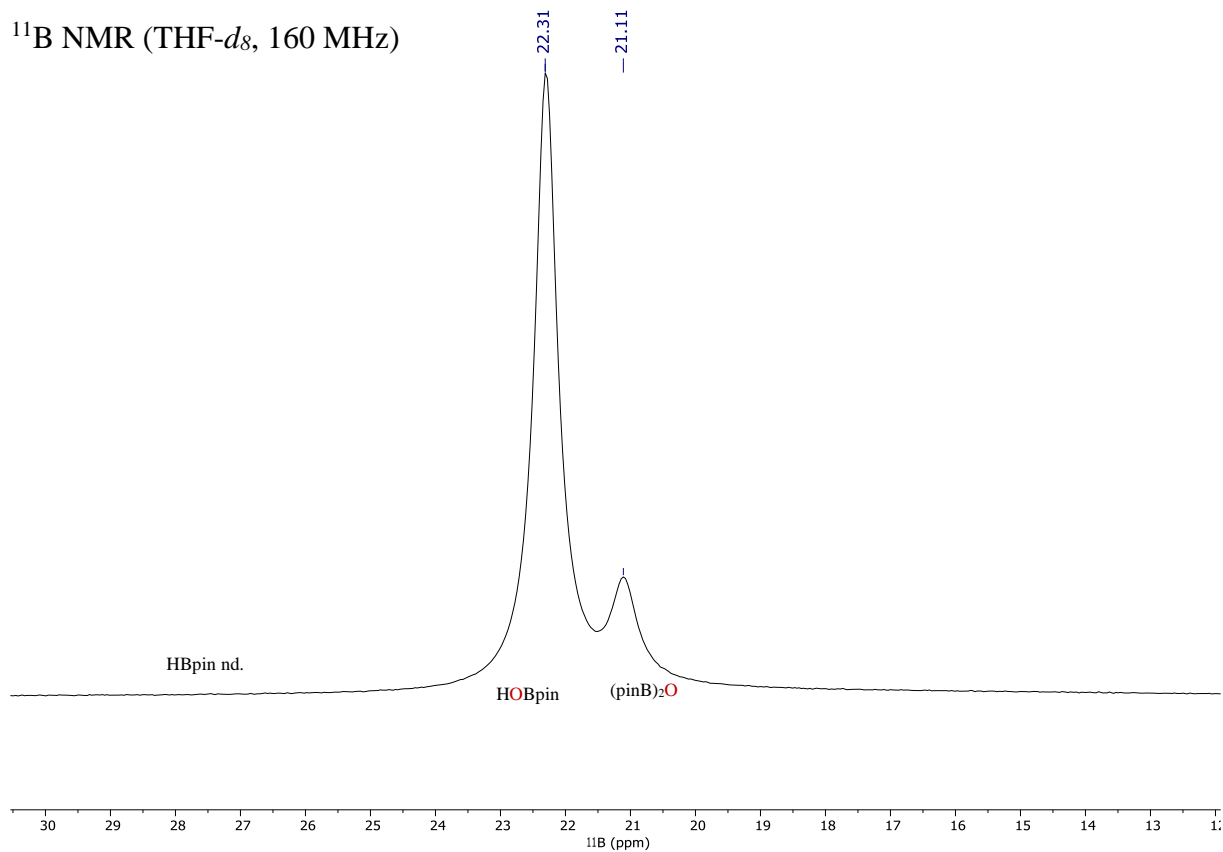

- Catalytic N<sub>2</sub>O Deoxygenation by Bismuthinidene (**1**)

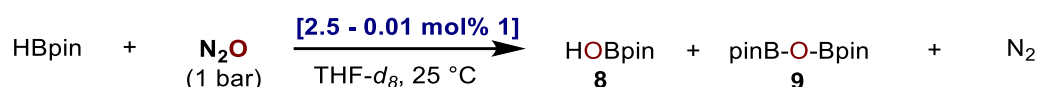

The stock solution was prepared by dissolving 2.7 mg bismuthinidene (**1**) in 1.0 mL THF-*d*<sub>8</sub>. 250 μL, 125 μL, 25.0 μL and 12.5 μL of this solution was used for 1.0 mol%, 0.5 mol%, 0.1 mol% and 0.05 mol% catalytic reactions.

For 0.01 mol% reaction, the stock solution was prepared by dissolving 2.7 mg bismuthinidene (**1**) in 2.0 mL THF-*d*<sub>8</sub> and 10.0 μL of this solution was used. The scale for 0.01 mol% reaction was 0.30 mmol. 25 mL pressure Schlenk flasks were used.

The conversions, yields and TONs were calculated by <sup>1</sup>H NMR integration relative to the mesitylene as internal standard. The conversion, yields and TON of 0.01 mol% catalytic reactions were obtained from an average of three independent reactions.

### 1.0 mol% reaction:

Violent release of N<sub>2</sub> was observed and the color of the solution remained green until completion of the reaction. The reaction time was estimated to be about 3 min.

The CH<sub>3</sub> of HOBpin (**8**) was very broad possibly due to the interaction between the deactivated catalyst and HOBpin (**8**). This effect was not observed when the catalyst loading was below 0.5 mol%. The amount of HOBpin (**8**) was calculated based on the integration of the OH. The amount of (pinB)<sub>2</sub>O (**9**) was calculated by subtracting the calculated amount of HOBpin (**8**) from the total amount of HOBpin (**8**) and (pinB)<sub>2</sub>O (**9**).

$^1\text{H}$  NMR (THF- $d_8$ , 500 MHz)

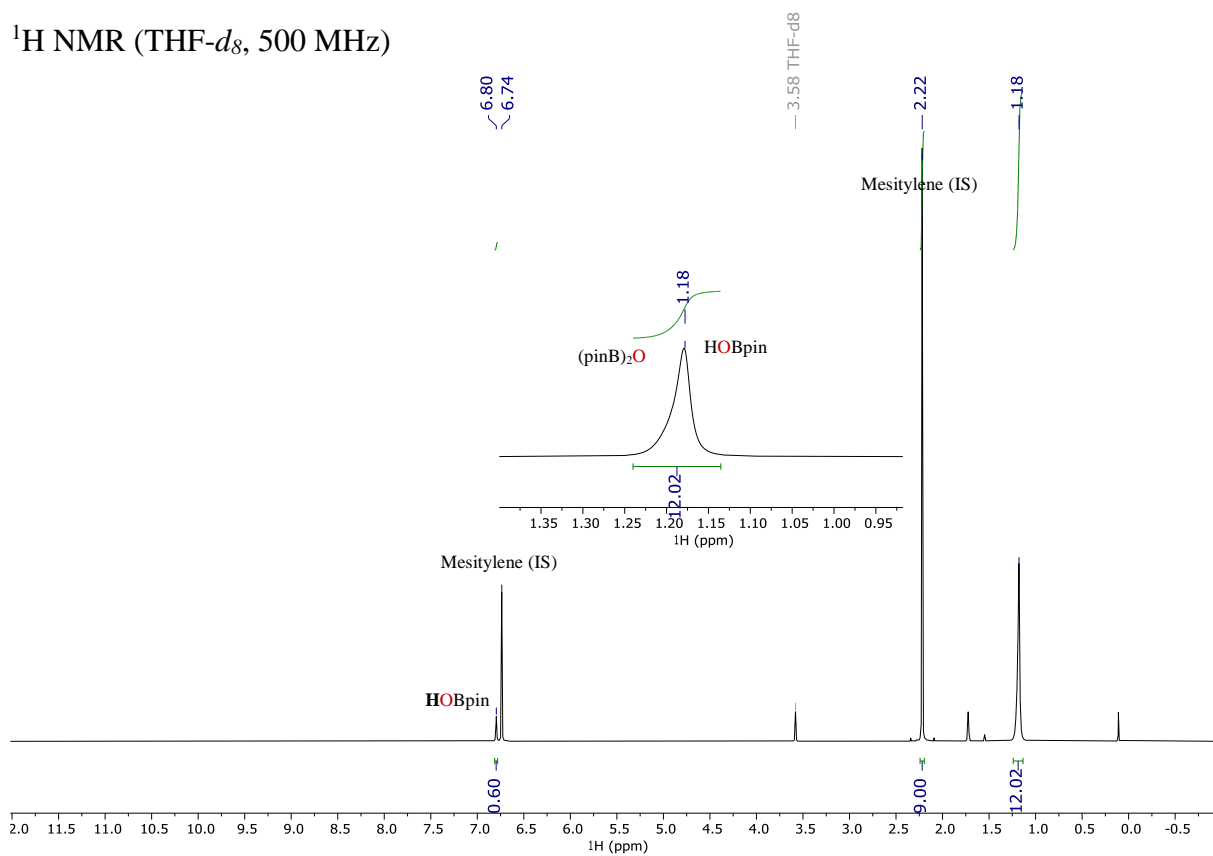

$^{11}\text{B}$  NMR (THF- $d_8$ , 160 MHz)

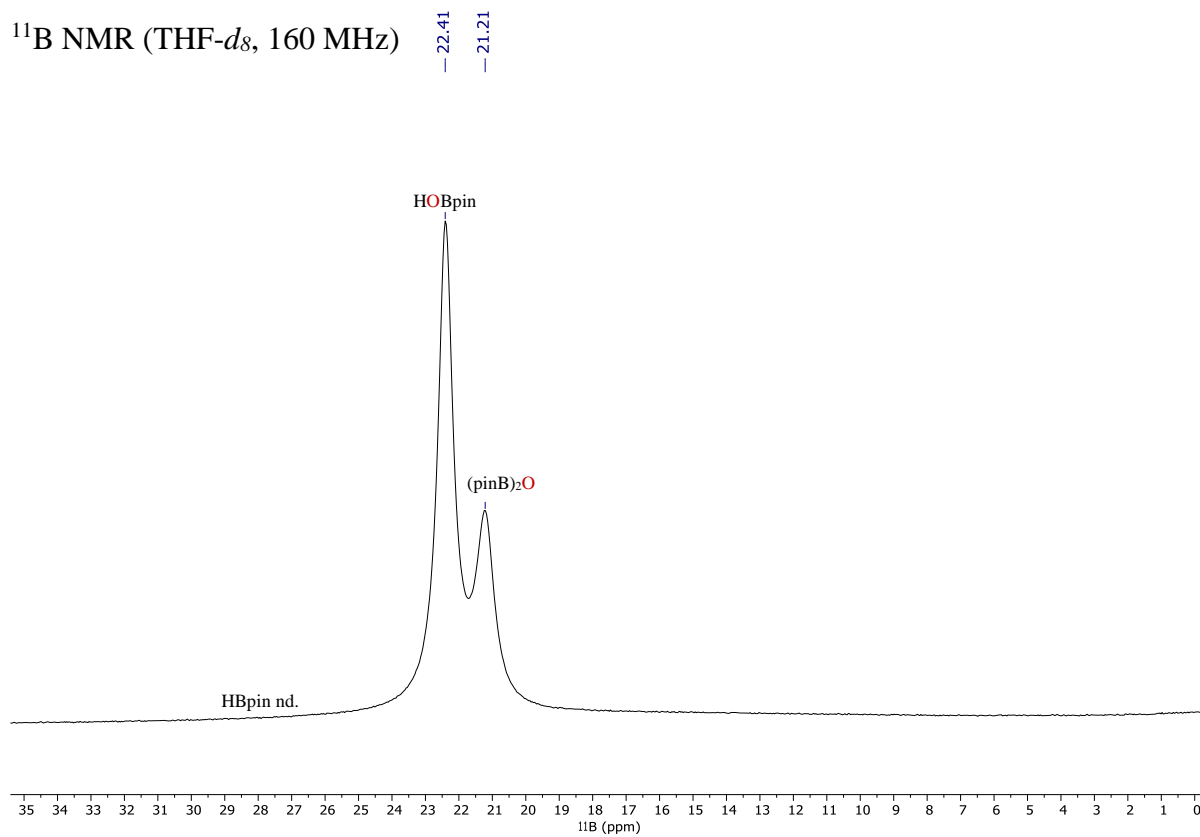

### 0.01 mol% reaction:

Gentle release of N<sub>2</sub> was observed and the color of the Bi(I) catalyst was barely observed. The reaction mixture was stirred for 11 h.

<sup>1</sup>H NMR (THF-*d*<sub>8</sub>, 500 MHz)

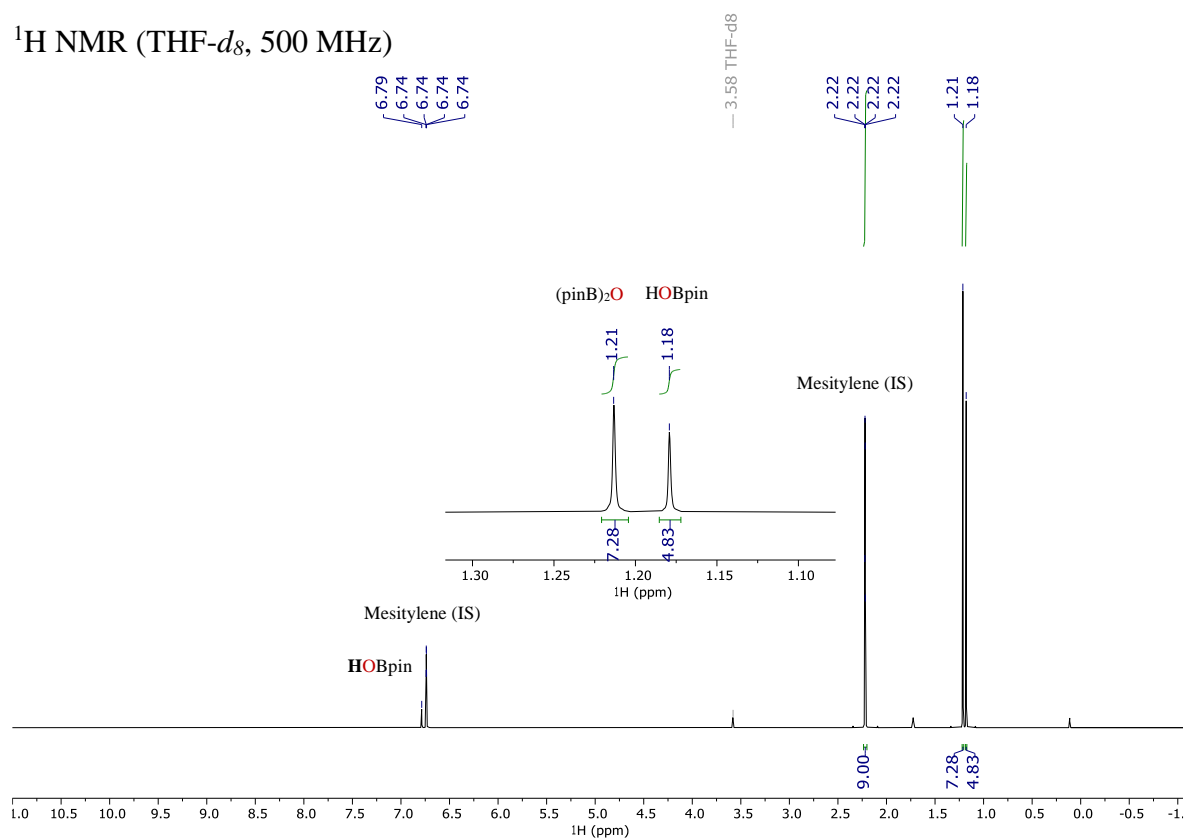

$^{11}\text{B}$  NMR (THF- $d_8$ , 160 MHz)

— 22.43  
— 21.23

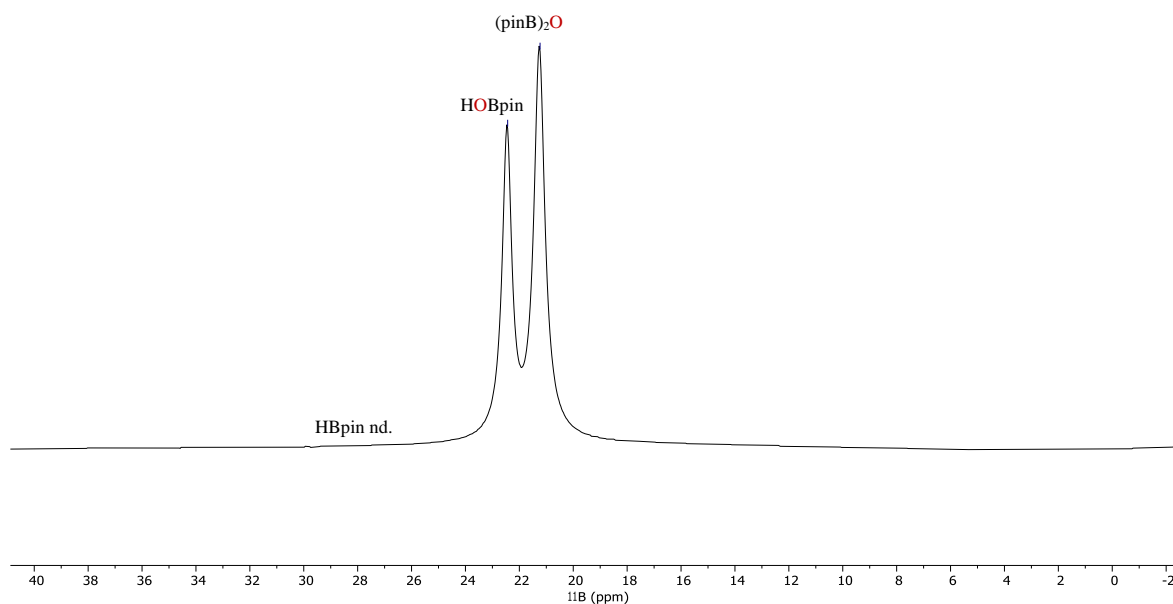

## 7. The Mechanistic Proposal

A simplified catalytic cycle was proposed as follows:

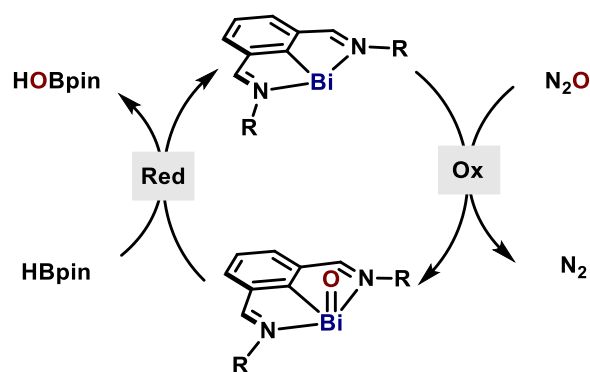

Detailed mechanistic suggestions:

1. N<sub>2</sub>O activation on Bi center

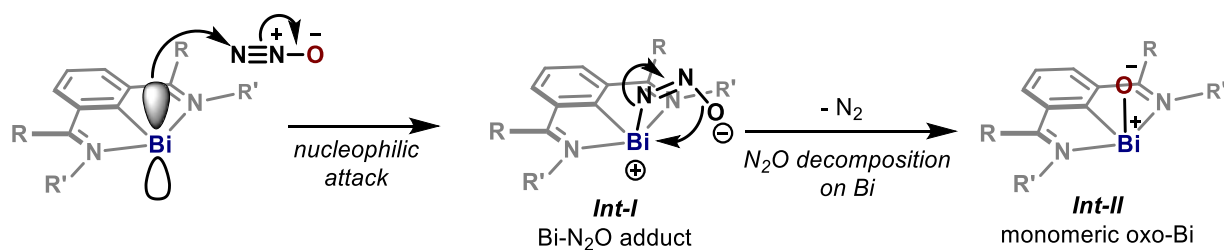

The initial step of N<sub>2</sub>O activation on Bi center is proposed to occur in analogy to NHCs.<sup>11</sup> Namely, bismuthinidenes (**1**, **4** and **5**) utilize electrons in the HOMO orbital (mainly consist of the *p<sub>z</sub>* orbital of the bismuth center)<sup>1a, 6</sup> to attack the terminal N of N<sub>2</sub>O. As a result, Bi-N<sub>2</sub>O adduct (**Int-I**) forms. Subsequently, the release of N<sub>2</sub> gives transient monomeric bismuth oxides (**Int-II**). Due to the high polarity of the Bi–O bond and the large difference in orbital size between Bi and O atoms, the transient **Int-II** are proposed to exist in ylide form.<sup>12</sup>

## 2. The stabilization of transient monomeric oxo-Bi (**Int-II**)

Because of the high instability of **Int-II**, they tend to be stabilized rapidly via dimerization or deprotonation/tautomerization process. The hydrogen-bonding between O and imine H suggested in **6** let us propose that the imine arms of **Int-II** readily rotate. After bond rotation, dimerization gives dimeric bismuth oxide **6** while deprotonation of CH<sub>3</sub> gives monomeric bismuth oxide **7**. **6** is a *trans*-isomer (with respect to the relative orientation of the Bi–Ar to a Bi<sub>2</sub>O<sub>2</sub> ring)<sup>13,14</sup> and has a dynamic structure where two imines are in dissociation/coordination equilibrium.

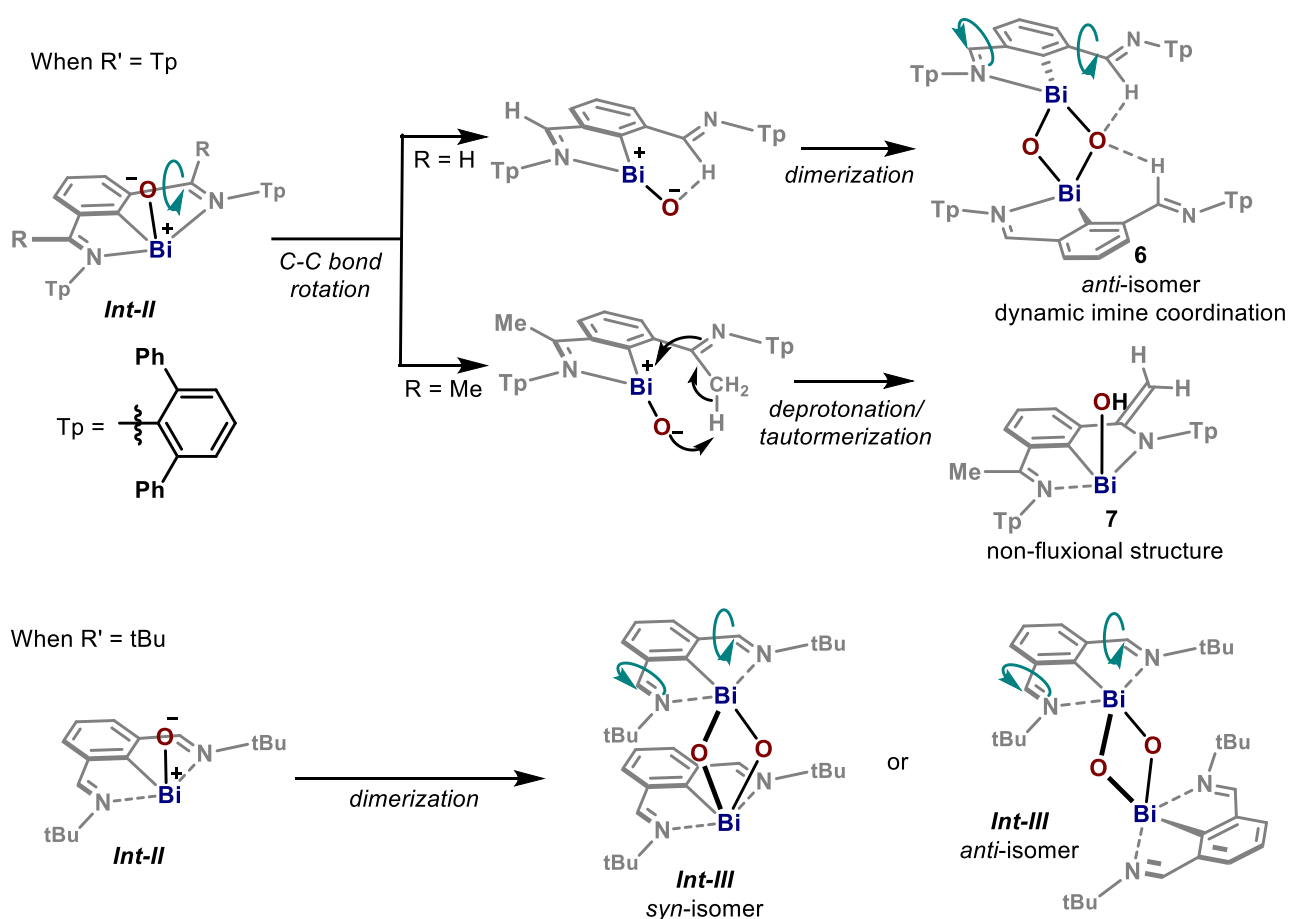

Based on the X-ray structure of **7** and NMR studies of the N<sub>2</sub>O oxidation of **1**, we propose that **Int-II** with tBu substituents would dimerize to form **Int-III** as an *anti*- or a *syn*-isomer.<sup>13,14,15</sup> Both isomers have dynamic behaviors.

### 3. Formation of Bi-oxo-HBpin adduct (*Int-V*)

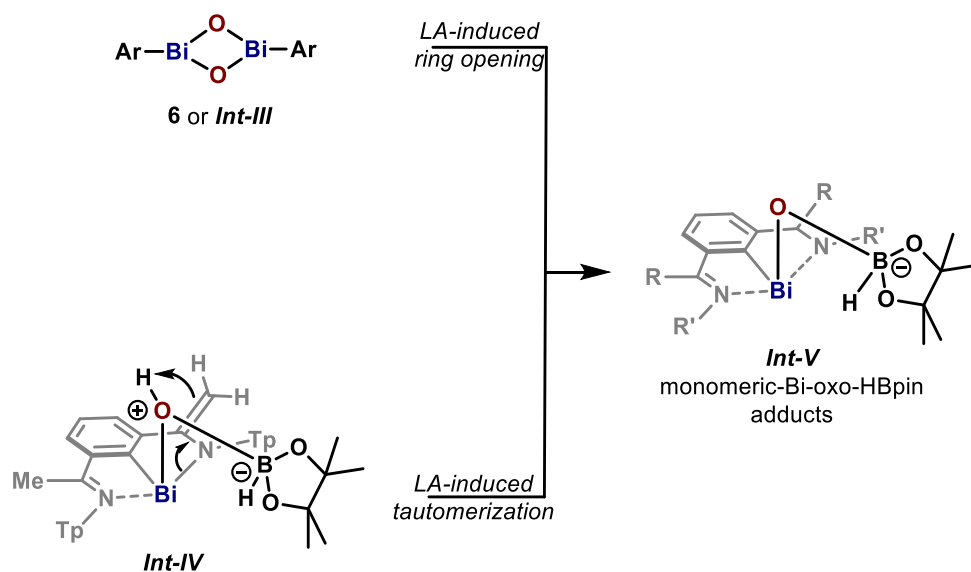

The coordination of the oxo group of **6** or *Int-III* to the Lewis-acidic B center of HBpin would probably lead to the ring-opening (this process has been reported for a  $(\text{LSbO})_2$  with  $\text{B}(\text{C}_6\text{F}_5)_3$ <sup>16</sup>). As for **7**, on the contrary, the acidity of the proton on OH enhances after HBpin coordination and this proton transfers to the enamine arm (this process has been reported for a  $\text{B}(\text{C}_6\text{F}_5)_3$ -stabilized  $\beta$ -diketiminato-derived boracarbonyl compound<sup>17</sup>). Both processes give monomeric-Bi-oxo-HBpin adduct *Int-V*.

### 4. Hydride transfer and reductive elimination

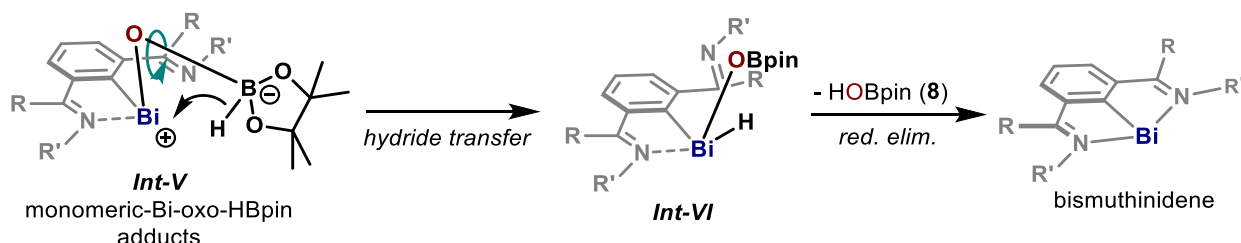

The hydridic H atom on tetrahedron B center migrates to cationic Bi center to form bismuth hydride *Int-VI*. Bismuth hydrides have been reported to be unstable,<sup>1, 6, 18</sup> and therefore it is proposed that *Int-VI* readily undergoes reductive elimination to yield HOBpin (**8**) and regenerates bismuthinidene catalysts.





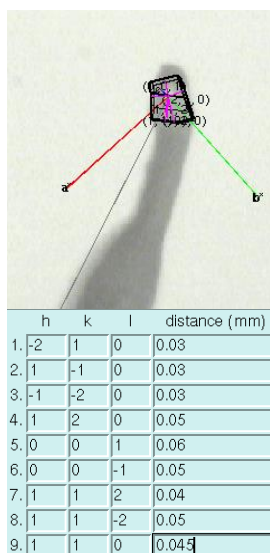

### INTENSITY STATISTICS FOR DATASET

| Resolution  | #Data | #Theory | %Complete | Redundancy | Mean I | Mean I/s | Rmerge | Rsigma |
|-------------|-------|---------|-----------|------------|--------|----------|--------|--------|
| Inf - 2.55  | 260   | 273     | 95.2      | 8.95       | 129.32 | 76.48    | 0.0300 | 0.0096 |
| 2.55 - 1.70 | 606   | 606     | 100.0     | 7.67       | 94.64  | 55.52    | 0.0278 | 0.0125 |
| 1.70 - 1.34 | 881   | 881     | 100.0     | 7.33       | 58.59  | 40.43    | 0.0325 | 0.0173 |
| 1.34 - 1.17 | 856   | 856     | 100.0     | 6.99       | 48.58  | 32.70    | 0.0374 | 0.0216 |
| 1.17 - 1.06 | 865   | 865     | 100.0     | 6.72       | 38.61  | 26.65    | 0.0450 | 0.0272 |
| 1.06 - 0.98 | 928   | 928     | 100.0     | 6.35       | 31.55  | 21.64    | 0.0560 | 0.0344 |
| 0.98 - 0.92 | 896   | 896     | 100.0     | 5.99       | 27.26  | 18.12    | 0.0657 | 0.0419 |
| 0.92 - 0.88 | 740   | 740     | 100.0     | 5.69       | 21.48  | 14.42    | 0.0827 | 0.0534 |
| 0.88 - 0.84 | 871   | 871     | 100.0     | 5.50       | 21.93  | 14.04    | 0.0857 | 0.0563 |
| 0.84 - 0.81 | 816   | 816     | 100.0     | 5.21       | 18.52  | 11.45    | 0.1030 | 0.0694 |
| 0.81 - 0.78 | 912   | 912     | 100.0     | 5.00       | 17.11  | 10.35    | 0.1113 | 0.0787 |
| 0.78 - 0.75 | 1038  | 1039    | 99.9      | 4.76       | 14.92  | 8.85     | 0.1307 | 0.0945 |
| 0.75 - 0.73 | 815   | 815     | 100.0     | 4.53       | 12.94  | 7.45     | 0.1482 | 0.1138 |
| 0.73 - 0.71 | 908   | 909     | 99.9      | 4.34       | 12.32  | 6.80     | 0.1711 | 0.1271 |
| 0.71 - 0.69 | 1013  | 1013    | 100.0     | 4.17       | 10.74  | 5.74     | 0.1972 | 0.1530 |
| 0.69 - 0.68 | 542   | 542     | 100.0     | 4.06       | 9.77   | 5.19     | 0.2059 | 0.1750 |
| 0.68 - 0.66 | 1195  | 1196    | 99.9      | 3.89       | 8.76   | 4.45     | 0.2389 | 0.2082 |
| 0.66 - 0.65 | 655   | 655     | 100.0     | 3.80       | 8.92   | 4.26     | 0.2387 | 0.2182 |
| 0.65 - 0.64 | 696   | 698     | 99.7      | 3.62       | 8.07   | 3.69     | 0.2668 | 0.2644 |
| 0.64 - 0.62 | 1668  | 1687    | 98.9      | 3.47       | 6.78   | 2.82     | 0.3225 | 0.3559 |
| 0.72 - 0.62 | 6224  | 6246    | 99.6      | 3.83       | 8.82   | 4.33     | 0.2389 | 0.2238 |
| Inf - 0.62  | 17161 | 17198   | 99.8      | 5.17       | 24.68  | 15.36    | 0.0679 | 0.0605 |

The high residual electron density (highest peak: 4.22 at 0.75 Å from Bi1 and deepest hole: -2.08 at 0.62 Å from Bi1) could possibly be caused by anharmonic displacement of the Bi atom.

Complete .cif-data of the compound are available under the CCDC number **CCDC-2031447**.

**Table S3. Crystal data and structure refinement.**

|                                                     |                                                                   |                                 |
|-----------------------------------------------------|-------------------------------------------------------------------|---------------------------------|
| Identification code                                 | 12978                                                             |                                 |
| Empirical formula                                   | C <sub>45</sub> H <sub>33</sub> Bi Cl <sub>4</sub> N <sub>2</sub> |                                 |
| Color                                               | yellow                                                            |                                 |
| Formula weight                                      | 952.51 g·mol <sup>-1</sup>                                        |                                 |
| Temperature                                         | 100(2) K                                                          |                                 |
| Wavelength                                          | 0.71073 Å                                                         |                                 |
| Crystal system                                      | monoclinic                                                        |                                 |
| Space group                                         | <i>P</i> 2 <sub>1</sub> / <i>n</i> , (No. 14)                     |                                 |
| Unit cell dimensions                                | <i>a</i> = 12.6023(6) Å                                           | $\alpha = 90^\circ$ .           |
|                                                     | <i>b</i> = 14.1992(16) Å                                          | $\beta = 92.842(6)^\circ$ .     |
|                                                     | <i>c</i> = 21.007(2) Å                                            | $\gamma = 90^\circ$ .           |
| Volume                                              | 3754.4(6) Å <sup>3</sup>                                          |                                 |
| Z                                                   | 4                                                                 |                                 |
| Density (calculated)                                | 1.685 Mg · m <sup>-3</sup>                                        |                                 |
| Absorption coefficient                              | 5.017 mm <sup>-1</sup>                                            |                                 |
| F(000)                                              | 1872 e                                                            |                                 |
| Crystal size                                        | 0.11 x 0.09 x 0.08 mm <sup>3</sup>                                |                                 |
| $\theta$ range for data collection                  | 2.852 to 27.498°.                                                 |                                 |
| Index ranges                                        | -16 ≤ <i>h</i> ≤ 15, -18 ≤ <i>k</i> ≤ 18, -27 ≤ <i>l</i> ≤ 27     |                                 |
| Reflections collected                               | 54781                                                             |                                 |
| Independent reflections                             | 8629 [ <i>R</i> <sub>int</sub> = 0.0487]                          |                                 |
| Reflections with <i>I</i> > 2σ( <i>I</i> )          | 7293                                                              |                                 |
| Completeness to $\theta = 25.242^\circ$             | 99.9 %                                                            |                                 |
| Absorption correction                               | Gaussian                                                          |                                 |
| Max. and min. transmission                          | 0.76 and 0.63                                                     |                                 |
| Refinement method                                   | Full-matrix least-squares on <i>F</i> <sup>2</sup>                |                                 |
| Data / restraints / parameters                      | 8629 / 0 / 469                                                    |                                 |
| Goodness-of-fit on <i>F</i> <sup>2</sup>            | 1.074                                                             |                                 |
| Final <i>R</i> indices [ <i>I</i> > 2σ( <i>I</i> )] | <i>R</i> <sub>1</sub> = 0.0309                                    | <i>wR</i> <sup>2</sup> = 0.0580 |
| <i>R</i> indices (all data)                         | <i>R</i> <sub>1</sub> = 0.0435                                    | <i>wR</i> <sup>2</sup> = 0.0633 |
| Largest diff. peak and hole                         | 4.2 and -2.1 e · Å <sup>-3</sup>                                  |                                 |

**Table S4. Bond lengths [ $\text{\AA}$ ] and angles [ $^\circ$ ].**

---

|                  |            |                 |            |
|------------------|------------|-----------------|------------|
| Cl(1)-Bi(1)      | 2.6635(10) | Cl(2)-Bi(1)     | 2.6624(10) |
| Cl(4)-C(99)      | 1.775(4)   | Cl(3)-C(99)     | 1.762(4)   |
| N(2)-C(8)        | 1.279(5)   | N(2)-C(27)      | 1.429(5)   |
| N(2)-Bi(1)       | 2.601(3)   | N(1)-C(7)       | 1.281(5)   |
| N(1)-C(9)        | 1.435(5)   | N(1)-Bi(1)      | 2.549(3)   |
| C(6)-C(8)        | 1.461(5)   | C(6)-C(1)       | 1.388(5)   |
| C(6)-C(5)        | 1.392(5)   | C(39)-C(40)     | 1.395(5)   |
| C(39)-C(32)      | 1.492(5)   | C(39)-C(44)     | 1.384(6)   |
| C(8)-H(8)        | 0.9500     | C(2)-C(1)       | 1.390(5)   |
| C(2)-C(3)        | 1.393(5)   | C(2)-C(7)       | 1.463(5)   |
| C(27)-C(32)      | 1.402(5)   | C(27)-C(28)     | 1.416(5)   |
| C(40)-H(40)      | 0.9500     | C(40)-C(41)     | 1.387(6)   |
| C(21)-C(26)      | 1.389(6)   | C(21)-C(22)     | 1.389(5)   |
| C(21)-C(14)      | 1.495(5)   | C(1)-Bi(1)      | 2.209(4)   |
| C(3)-C(4)        | 1.391(5)   | C(23)-C(22)     | 1.388(6)   |
| C(23)-C(24)      | 1.373(6)   | C(26)-C(25)     | 1.387(6)   |
| C(41)-C(42)      | 1.381(6)   | C(32)-C(31)     | 1.391(5)   |
| C(43)-C(44)      | 1.396(6)   | C(43)-C(42)     | 1.377(6)   |
| C(28)-C(33)      | 1.495(5)   | C(28)-C(29)     | 1.391(5)   |
| C(5)-C(4)        | 1.385(6)   | C(33)-C(38)     | 1.394(5)   |
| C(33)-C(34)      | 1.396(5)   | C(38)-C(37)     | 1.392(5)   |
| C(14)-C(9)       | 1.399(5)   | C(14)-C(13)     | 1.391(5)   |
| C(9)-C(10)       | 1.413(5)   | C(35)-C(34)     | 1.389(5)   |
| C(35)-C(36)      | 1.396(6)   | C(25)-C(24)     | 1.385(6)   |
| C(13)-C(12)      | 1.386(6)   | C(29)-C(30)     | 1.388(6)   |
| C(10)-C(15)      | 1.495(6)   | C(10)-C(11)     | 1.396(5)   |
| C(20)-C(15)      | 1.406(6)   | C(20)-C(19)     | 1.392(6)   |
| C(12)-C(11)      | 1.379(6)   | C(15)-C(16)     | 1.394(6)   |
| C(31)-C(30)      | 1.382(6)   | C(37)-C(36)     | 1.376(6)   |
| C(18)-C(17)      | 1.366(7)   | C(18)-C(19)     | 1.394(6)   |
| C(17)-C(16)      | 1.398(7)   |                 |            |
| C(8)-N(2)-C(27)  | 119.7(3)   | C(8)-N(2)-Bi(1) | 109.1(2)   |
| C(27)-N(2)-Bi(1) | 131.0(2)   | C(7)-N(1)-C(9)  | 119.0(3)   |

|                   |          |                   |           |
|-------------------|----------|-------------------|-----------|
| C(7)-N(1)-Bi(1)   | 110.0(2) | C(9)-N(1)-Bi(1)   | 130.5(2)  |
| C(1)-C(6)-C(8)    | 117.7(3) | C(1)-C(6)-C(5)    | 120.2(3)  |
| C(5)-C(6)-C(8)    | 122.0(3) | C(40)-C(39)-C(32) | 118.8(4)  |
| C(44)-C(39)-C(40) | 119.0(4) | C(44)-C(39)-C(32) | 121.9(4)  |
| N(2)-C(8)-C(6)    | 121.7(3) | C(1)-C(2)-C(3)    | 119.8(3)  |
| C(1)-C(2)-C(7)    | 117.3(3) | C(3)-C(2)-C(7)    | 122.8(3)  |
| C(32)-C(27)-N(2)  | 118.7(3) | C(32)-C(27)-C(28) | 119.7(3)  |
| C(28)-C(27)-N(2)  | 121.4(3) | C(41)-C(40)-C(39) | 120.8(4)  |
| C(26)-C(21)-C(22) | 119.2(4) | C(26)-C(21)-C(14) | 121.1(4)  |
| C(22)-C(21)-C(14) | 119.4(4) | C(6)-C(1)-C(2)    | 120.0(3)  |
| C(6)-C(1)-Bi(1)   | 120.3(3) | C(2)-C(1)-Bi(1)   | 119.4(3)  |
| C(4)-C(3)-C(2)    | 120.0(4) | C(24)-C(23)-C(22) | 119.8(4)  |
| C(25)-C(26)-C(21) | 120.1(4) | C(42)-C(41)-C(40) | 119.6(4)  |
| C(27)-C(32)-C(39) | 122.9(3) | C(31)-C(32)-C(39) | 117.3(3)  |
| C(31)-C(32)-C(27) | 119.8(4) | C(42)-C(43)-C(44) | 120.4(4)  |
| C(27)-C(28)-C(33) | 125.2(3) | C(29)-C(28)-C(27) | 118.5(3)  |
| C(29)-C(28)-C(33) | 116.1(3) | N(1)-C(7)-C(2)    | 121.1(3)  |
| C(4)-C(5)-C(6)    | 119.8(3) | C(23)-C(22)-C(21) | 120.5(4)  |
| C(38)-C(33)-C(28) | 120.1(3) | C(38)-C(33)-C(34) | 119.4(4)  |
| C(34)-C(33)-C(28) | 120.2(3) | C(39)-C(44)-C(43) | 120.0(4)  |
| C(43)-C(42)-C(41) | 120.2(4) | C(37)-C(38)-C(33) | 120.1(4)  |
| C(9)-C(14)-C(21)  | 122.2(3) | C(13)-C(14)-C(21) | 118.5(3)  |
| C(13)-C(14)-C(9)  | 119.2(4) | C(14)-C(9)-N(1)   | 119.3(3)  |
| C(14)-C(9)-C(10)  | 120.8(3) | C(10)-C(9)-N(1)   | 119.8(3)  |
| C(34)-C(35)-C(36) | 120.2(4) | C(24)-C(25)-C(26) | 120.0(4)  |
| C(12)-C(13)-C(14) | 120.3(4) | C(30)-C(29)-C(28) | 121.7(4)  |
| C(5)-C(4)-C(3)    | 120.2(4) | C(35)-C(34)-C(33) | 120.1(4)  |
| C(9)-C(10)-C(15)  | 122.3(3) | C(11)-C(10)-C(9)  | 117.9(4)  |
| C(11)-C(10)-C(15) | 119.7(4) | Cl(3)-C(99)-Cl(4) | 111.3(2)  |
| C(19)-C(20)-C(15) | 120.7(4) | C(11)-C(12)-C(13) | 120.4(4)  |
| C(20)-C(15)-C(10) | 120.1(4) | C(16)-C(15)-C(10) | 121.7(4)  |
| C(16)-C(15)-C(20) | 118.2(4) | C(12)-C(11)-C(10) | 121.2(4)  |
| C(30)-C(31)-C(32) | 120.9(4) | C(36)-C(37)-C(38) | 120.6(4)  |
| C(23)-C(24)-C(25) | 120.3(4) | C(17)-C(18)-C(19) | 119.8(4)  |
| C(18)-C(17)-C(16) | 120.9(4) | C(15)-C(16)-C(17) | 120.3(4)  |
| C(31)-C(30)-C(29) | 119.2(4) | C(20)-C(19)-C(18) | 119.9(4)  |
| C(37)-C(36)-C(35) | 119.7(4) | Cl(2)-Bi(1)-Cl(1) | 168.36(3) |
| N(2)-Bi(1)-Cl(1)  | 93.54(7) | N(2)-Bi(1)-Cl(2)  | 79.95(7)  |

|                  |            |                  |           |
|------------------|------------|------------------|-----------|
| N(1)-Bi(1)-Cl(1) | 90.78(7)   | N(1)-Bi(1)-Cl(2) | 87.91(7)  |
| N(1)-Bi(1)-N(2)  | 138.69(10) | C(1)-Bi(1)-Cl(1) | 78.20(9)  |
| C(1)-Bi(1)-Cl(2) | 90.47(9)   | C(1)-Bi(1)-N(2)  | 70.12(12) |
| C(1)-Bi(1)-N(1)  | 70.67(12)  |                  |           |

---

## 8.2. Single Crystal Structure Analysis of **3** 1· TCM

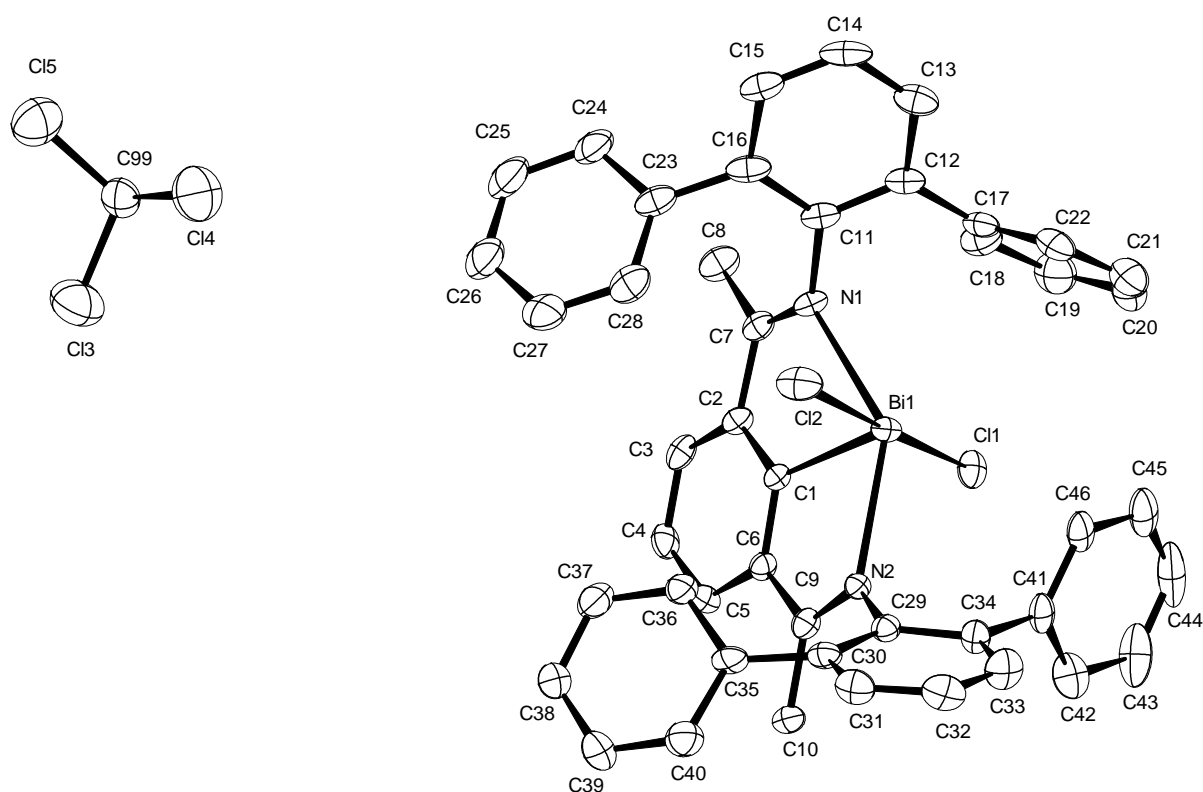

**Figure S2.** The molecular structure of complex **3** 1· TCM. H atoms have been removed for clarity.

**X-ray Crystal Structure Analysis of complex 3 1·TCM:**  $C_{47}H_{36}BiCl_5N_2$ ,  $M_r = 4198.1(7)$  g mol<sup>-1</sup>, light yellow plate, crystal size 0.11 x 0.09 x 0.04 mm<sup>3</sup>, orthorhombic,  $Pna2_1$  [33],  $a = 17.5685(13)$  Å,  $b = 10.9004(5)$  Å,  $c = 21.922(3)$  Å,  $V = 4198.1(7)$  Å<sup>3</sup>,  $T = 100(2)$  K,  $Z = 4$ ,  $D_{calc} = 1.606$  g·cm<sup>3</sup>,  $\lambda = 0.71073$  Å,  $\mu(Mo-K\alpha) = 4.554$  mm<sup>-1</sup>, analytical absorption correction ( $T_{min} = 0.62820$ ,  $T_{max} = 0.84300$ ), Bruker AXS Enraf-Nonius KappaCCD diffractometer with a FR591 rotating Mo-anode X-ray source,  $2.879 < \theta < 33.134^\circ$ , 94400 measured reflections, 15965 independent reflections, 10813 reflections with  $I > 2\sigma(I)$ ,  $R_{int} = 0.0855$ . The structure was solved by *SHELXS* and refined by full-matrix least-squares (*SHELXL*) against  $F^2$  to  $R_1 = 0.0405$  [ $I > 2\sigma(I)$ ],  $wR_2 = 0.0630$ , 499 parameters.

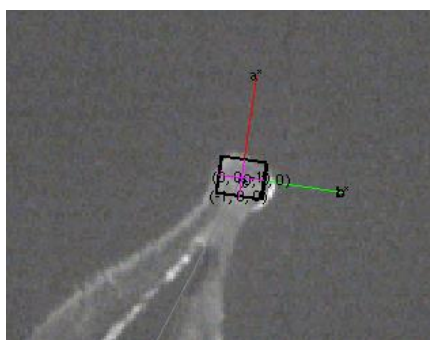

|    | h  | k  | l  | distance (mm) |
|----|----|----|----|---------------|
| 1. | 0  | 0  | -1 | 0.02          |
| 2. | 0  | 0  | 1  | 0.02          |
| 3. | 0  | 1  | 0  | 0.055         |
| 4. | 0  | -1 | 0  | 0.055         |
| 5. | -1 | 0  | 0  | 0.045         |
| 6. | 1  | 0  | 0  | 0.045         |

The automatic indexing gave these results:

```

(Input cell) : a=10.9165 b=17.5737 c=21.9141 alpha=89.969 beta=90.009 gamma=90.004 P
Reduced cell : a=10.9165 b=17.5737 c=21.9141 alpha=89.969 beta=89.991 gamma=89.996
Conventional : a=10.9165 b=17.5737 c=21.9141 alpha=89.969 beta=89.991 gamma=89.996 P
Volume      : 4204.05; System: orthorhombic; Point group: mm)
100 reflections from the peaklist fit this lattice, 0 do not
  
```

NDisplay: i07f0001.kccd

File Options Tools Imagefilters Help

Image max: 26539  
max: 1000  
Linear scale  
Logarithmic scale  
min: 0  
Image min: -1452  
Next file  
Previous file  
Next set  
Previous set  
Redisplay  
Quit

theta= 0.000  
d= 40.000  
phi= 90.000  
omega= 171.981  
kappa= 24.880

## INTENSITY STATISTICS FOR DATASET

| Resolution  | #Data | #Theory | %Complete | Redundancy | Mean I | Mean I/s | Rmerge | Rsigma |
|-------------|-------|---------|-----------|------------|--------|----------|--------|--------|
| Inf - 2.80  | 132   | 143     | 92.3      | 19.69      | 78.01  | 76.06    | 0.0352 | 0.0090 |
| 2.80 - 1.84 | 309   | 309     | 100.0     | 16.11      | 55.56  | 57.07    | 0.0364 | 0.0114 |
| 1.84 - 1.45 | 437   | 437     | 100.0     | 14.96      | 35.90  | 42.37    | 0.0424 | 0.0146 |
| 1.45 - 1.25 | 454   | 454     | 100.0     | 14.66      | 26.30  | 35.67    | 0.0510 | 0.0179 |
| 1.25 - 1.13 | 444   | 444     | 100.0     | 13.81      | 22.54  | 30.83    | 0.0550 | 0.0214 |
| 1.13 - 1.05 | 419   | 419     | 100.0     | 13.28      | 18.12  | 25.58    | 0.0674 | 0.0262 |
| 1.05 - 0.98 | 471   | 471     | 100.0     | 12.83      | 15.16  | 22.11    | 0.0795 | 0.0317 |
| 0.98 - 0.93 | 445   | 445     | 100.0     | 12.47      | 12.60  | 18.39    | 0.0933 | 0.0381 |
| 0.93 - 0.89 | 420   | 420     | 100.0     | 11.85      | 10.64  | 15.71    | 0.1085 | 0.0467 |
| 0.89 - 0.85 | 497   | 497     | 100.0     | 11.43      | 9.97   | 14.53    | 0.1200 | 0.0517 |
| 0.85 - 0.82 | 447   | 447     | 100.0     | 10.89      | 8.53   | 12.08    | 0.1406 | 0.0638 |
| 0.82 - 0.79 | 499   | 499     | 100.0     | 10.52      | 7.00   | 10.01    | 0.1723 | 0.0781 |
| 0.79 - 0.77 | 386   | 386     | 100.0     | 10.09      | 7.38   | 10.06    | 0.1759 | 0.0809 |
| 0.77 - 0.75 | 437   | 437     | 100.0     | 9.70       | 5.85   | 8.04     | 0.2191 | 0.1042 |
| 0.75 - 0.73 | 453   | 453     | 100.0     | 9.36       | 5.23   | 7.00     | 0.2532 | 0.1230 |
| 0.73 - 0.71 | 546   | 546     | 100.0     | 9.01       | 4.86   | 6.19     | 0.2672 | 0.1427 |
| 0.71 - 0.70 | 267   | 267     | 100.0     | 8.75       | 4.24   | 5.29     | 0.3003 | 0.1732 |
| 0.70 - 0.68 | 623   | 623     | 100.0     | 8.56       | 3.93   | 4.58     | 0.3474 | 0.2050 |
| 0.68 - 0.67 | 344   | 344     | 100.0     | 8.23       | 3.54   | 3.76     | 0.3897 | 0.2524 |
| 0.67 - 0.66 | 367   | 367     | 100.0     | 7.95       | 3.20   | 3.18     | 0.4272 | 0.3067 |
| 0.66 - 0.65 | 360   | 364     | 98.9      | 7.74       | 3.20   | 2.88     | 0.4508 | 0.3506 |
| 0.75 - 0.65 | 2960  | 2964    | 99.9      | 8.57       | 4.10   | 4.84     | 0.3259 | 0.2008 |
| Inf - 0.65  | 8757  | 8772    | 99.8      | 11.24      | 13.67  | 17.28    | 0.0831 | 0.0459 |

The crystal appears to be twinned by inversion (TWIN -1 0 0 0 -1 0 0 0 -1) with a refined (BASF) 54.4% occupancy of the inverse structure.

Complete .cif-data of the compound are available under the CCDC number **CCDC-2031446**.

**Table S5. Crystal data and structure refinement.**

|                                                     |                                                                  |                                 |
|-----------------------------------------------------|------------------------------------------------------------------|---------------------------------|
| Identification code                                 | 13155                                                            |                                 |
| Empirical formula                                   | C <sub>47</sub> H <sub>36</sub> BiCl <sub>5</sub> N <sub>2</sub> |                                 |
| Color                                               | yellow                                                           |                                 |
| Formula weight                                      | 1015.01 g · mol <sup>-1</sup>                                    |                                 |
| Temperature                                         | 100(2) K                                                         |                                 |
| Wavelength                                          | 0.71073 Å                                                        |                                 |
| Crystal system                                      | ORTHORHOMBIC                                                     |                                 |
| Space group                                         | <i>Pna</i> 2 <sub>1</sub> , (No. 33)                             |                                 |
| Unit cell dimensions                                | <i>a</i> = 17.5685(13) Å                                         | $\alpha = 90^\circ$ .           |
|                                                     | <i>b</i> = 10.9004(5) Å                                          | $\beta = 90^\circ$ .            |
|                                                     | <i>c</i> = 21.922(3) Å                                           | $\gamma = 90^\circ$ .           |
| Volume                                              | 4198.1(7) Å <sup>3</sup>                                         |                                 |
| Z                                                   | 4                                                                |                                 |
| Density (calculated)                                | 1.606 Mg · m <sup>-3</sup>                                       |                                 |
| Absorption coefficient                              | 4.554 mm <sup>-1</sup>                                           |                                 |
| F(000)                                              | 2000 e                                                           |                                 |
| Crystal size                                        | 0.11 x 0.09 x 0.04 mm <sup>3</sup>                               |                                 |
| $\theta$ range for data collection                  | 2.879 to 33.134°.                                                |                                 |
| Index ranges                                        | -27 ≤ <i>h</i> ≤ 27, -16 ≤ <i>k</i> ≤ 16, -33 ≤ <i>l</i> ≤ 33    |                                 |
| Reflections collected                               | 94400                                                            |                                 |
| Independent reflections                             | 15965 [ <i>R</i> <sub>int</sub> = 0.0855]                        |                                 |
| Reflections with <i>I</i> > 2σ( <i>I</i> )          | 10813                                                            |                                 |
| Completeness to $\theta = 25.242^\circ$             | 99.8 %                                                           |                                 |
| Absorption correction                               | Gaussian                                                         |                                 |
| Max. and min. transmission                          | 0.84 and 0.63                                                    |                                 |
| Refinement method                                   | Full-matrix least-squares on <i>F</i> <sup>2</sup>               |                                 |
| Data / restraints / parameters                      | 15965 / 1 / 499                                                  |                                 |
| Goodness-of-fit on <i>F</i> <sup>2</sup>            | 1.028                                                            |                                 |
| Final <i>R</i> indices [ <i>I</i> > 2σ( <i>I</i> )] | <i>R</i> <sub>1</sub> = 0.0405                                   | <i>wR</i> <sup>2</sup> = 0.0630 |
| <i>R</i> indices (all data)                         | <i>R</i> <sub>1</sub> = 0.0827                                   | <i>wR</i> <sup>2</sup> = 0.0727 |
| Absolute structure parameter                        | 0.544(6)                                                         |                                 |
| Largest diff. peak and hole                         | 1.8 and -1.4 e · Å <sup>-3</sup>                                 |                                 |



**Table S6. Bond lengths [Å] and angles [°].**

---

|                   |            |                  |            |
|-------------------|------------|------------------|------------|
| Bi(1)-Cl(1)       | 2.6209(17) | Bi(1)-Cl(2)      | 2.7438(16) |
| Bi(1)-N(1)        | 2.493(5)   | Bi(1)-N(2)       | 2.499(5)   |
| Bi(1)-C(1)        | 2.212(6)   | N(1)-C(7)        | 1.293(8)   |
| N(1)-C(11)        | 1.428(8)   | N(2)-C(9)        | 1.296(8)   |
| N(2)-C(29)        | 1.435(8)   | C(1)-C(2)        | 1.382(8)   |
| C(1)-C(6)         | 1.386(8)   | C(2)-C(3)        | 1.391(8)   |
| C(2)-C(7)         | 1.493(9)   | C(3)-C(4)        | 1.387(9)   |
| C(4)-C(5)         | 1.385(9)   | C(5)-C(6)        | 1.409(8)   |
| C(6)-C(9)         | 1.483(8)   | C(7)-C(8)        | 1.486(8)   |
| C(9)-C(10)        | 1.494(9)   | C(11)-C(12)      | 1.402(9)   |
| C(11)-C(16)       | 1.406(9)   | C(12)-C(13)      | 1.402(9)   |
| C(12)-C(17)       | 1.489(9)   | C(13)-C(14)      | 1.373(10)  |
| C(14)-C(15)       | 1.389(11)  | C(15)-C(16)      | 1.401(9)   |
| C(16)-C(23)       | 1.510(11)  | C(17)-C(18)      | 1.379(10)  |
| C(17)-C(22)       | 1.385(10)  | C(18)-C(19)      | 1.403(12)  |
| C(19)-C(20)       | 1.368(11)  | C(20)-C(21)      | 1.378(13)  |
| C(21)-C(22)       | 1.390(11)  | C(23)-C(24)      | 1.383(9)   |
| C(23)-C(28)       | 1.403(12)  | C(24)-C(25)      | 1.398(11)  |
| C(25)-C(26)       | 1.343(12)  | C(26)-C(27)      | 1.385(11)  |
| C(27)-C(28)       | 1.392(11)  | C(29)-C(30)      | 1.407(9)   |
| C(29)-C(34)       | 1.402(8)   | C(30)-C(31)      | 1.386(9)   |
| C(30)-C(35)       | 1.481(10)  | C(31)-C(32)      | 1.384(9)   |
| C(32)-C(33)       | 1.388(10)  | C(33)-C(34)      | 1.389(9)   |
| C(34)-C(41)       | 1.495(9)   | C(35)-C(36)      | 1.422(10)  |
| C(35)-C(40)       | 1.411(10)  | C(36)-C(37)      | 1.381(10)  |
| C(37)-C(38)       | 1.389(10)  | C(38)-C(39)      | 1.391(10)  |
| C(39)-C(40)       | 1.375(10)  | C(41)-C(42)      | 1.401(10)  |
| C(41)-C(46)       | 1.389(10)  | C(42)-C(43)      | 1.386(10)  |
| C(43)-C(44)       | 1.357(13)  | C(44)-C(45)      | 1.359(12)  |
| C(45)-C(46)       | 1.396(10)  | Cl(3)-C(99)      | 1.751(8)   |
| Cl(4)-C(99)       | 1.743(7)   | Cl(5)-C(99)      | 1.757(8)   |
| Cl(1)-Bi(1)-Cl(2) | 178.29(6)  | N(1)-Bi(1)-Cl(1) | 93.30(13)  |
| N(1)-Bi(1)-Cl(2)  | 86.18(12)  | N(1)-Bi(1)-N(2)  | 138.97(17) |

|                   |           |                   |            |
|-------------------|-----------|-------------------|------------|
| N(2)-Bi(1)-Cl(1)  | 92.05(12) | N(2)-Bi(1)-Cl(2)  | 89.41(12)  |
| C(1)-Bi(1)-Cl(1)  | 80.16(16) | C(1)-Bi(1)-Cl(2)  | 101.19(16) |
| C(1)-Bi(1)-N(1)   | 70.37(19) | C(1)-Bi(1)-N(2)   | 70.57(19)  |
| C(7)-N(1)-Bi(1)   | 113.4(4)  | C(7)-N(1)-C(11)   | 123.7(5)   |
| C(11)-N(1)-Bi(1)  | 122.8(4)  | C(9)-N(2)-Bi(1)   | 113.3(4)   |
| C(9)-N(2)-C(29)   | 122.8(5)  | C(29)-N(2)-Bi(1)  | 123.4(4)   |
| C(2)-C(1)-Bi(1)   | 119.2(5)  | C(2)-C(1)-C(6)    | 121.0(6)   |
| C(6)-C(1)-Bi(1)   | 118.5(4)  | C(1)-C(2)-C(3)    | 120.1(6)   |
| C(1)-C(2)-C(7)    | 117.8(5)  | C(3)-C(2)-C(7)    | 122.1(5)   |
| C(4)-C(3)-C(2)    | 119.2(6)  | C(5)-C(4)-C(3)    | 121.2(6)   |
| C(4)-C(5)-C(6)    | 119.4(6)  | C(1)-C(6)-C(5)    | 119.0(5)   |
| C(1)-C(6)-C(9)    | 118.6(5)  | C(5)-C(6)-C(9)    | 122.3(6)   |
| N(1)-C(7)-C(2)    | 116.8(5)  | N(1)-C(7)-C(8)    | 123.9(6)   |
| C(8)-C(7)-C(2)    | 119.3(5)  | N(2)-C(9)-C(6)    | 116.7(6)   |
| N(2)-C(9)-C(10)   | 123.9(5)  | C(6)-C(9)-C(10)   | 119.4(5)   |
| C(12)-C(11)-N(1)  | 118.3(6)  | C(12)-C(11)-C(16) | 120.9(6)   |
| C(16)-C(11)-N(1)  | 120.5(6)  | C(11)-C(12)-C(17) | 121.9(6)   |
| C(13)-C(12)-C(11) | 118.3(6)  | C(13)-C(12)-C(17) | 119.7(6)   |
| C(12)-C(13)-H(13) | 119.4     | C(14)-C(13)-C(12) | 121.1(7)   |
| C(13)-C(14)-C(15) | 120.5(6)  | C(14)-C(15)-C(16) | 120.2(6)   |
| C(11)-C(16)-C(23) | 123.4(6)  | C(15)-C(16)-C(11) | 118.8(7)   |
| C(15)-C(16)-C(23) | 117.8(6)  | C(18)-C(17)-C(12) | 119.9(6)   |
| C(18)-C(17)-C(22) | 118.7(7)  | C(22)-C(17)-C(12) | 121.1(7)   |
| C(17)-C(18)-C(19) | 121.0(8)  | C(20)-C(19)-C(18) | 120.0(9)   |
| C(19)-C(20)-C(21) | 119.1(9)  | C(20)-C(21)-C(22) | 121.4(8)   |
| C(17)-C(22)-C(21) | 119.8(8)  | C(24)-C(23)-C(16) | 118.8(8)   |
| C(24)-C(23)-C(28) | 118.7(8)  | C(28)-C(23)-C(16) | 122.5(6)   |
| C(23)-C(24)-C(25) | 119.3(7)  | C(26)-C(25)-C(24) | 122.1(7)   |
| C(25)-C(26)-C(27) | 119.7(8)  | C(26)-C(27)-C(28) | 119.7(8)   |
| C(27)-C(28)-C(23) | 120.4(7)  | C(30)-C(29)-N(2)  | 120.4(5)   |
| C(34)-C(29)-N(2)  | 118.9(6)  | C(34)-C(29)-C(30) | 120.6(6)   |
| C(29)-C(30)-C(35) | 122.8(6)  | C(31)-C(30)-C(29) | 118.4(6)   |
| C(31)-C(30)-C(35) | 118.5(6)  | C(32)-C(31)-C(30) | 121.3(7)   |
| C(31)-C(32)-C(33) | 119.9(6)  | C(32)-C(33)-C(34) | 120.4(7)   |
| C(29)-C(34)-C(41) | 121.5(5)  | C(33)-C(34)-C(29) | 119.2(6)   |
| C(33)-C(34)-C(41) | 119.3(6)  | C(36)-C(35)-C(30) | 123.2(7)   |
| C(40)-C(35)-C(30) | 120.5(7)  | C(40)-C(35)-C(36) | 116.2(8)   |
| C(37)-C(36)-C(35) | 120.4(8)  | C(36)-C(37)-C(38) | 121.0(7)   |

|                   |          |                   |          |
|-------------------|----------|-------------------|----------|
| C(37)-C(38)-C(39) | 120.3(7) | C(40)-C(39)-C(38) | 118.4(7) |
| C(39)-C(40)-C(35) | 123.6(7) | C(42)-C(41)-C(34) | 120.5(7) |
| C(46)-C(41)-C(34) | 122.0(6) | C(46)-C(41)-C(42) | 117.4(7) |
| C(43)-C(42)-C(41) | 120.4(8) | C(44)-C(43)-C(42) | 121.3(9) |
| C(43)-C(44)-C(45) | 119.4(8) | C(44)-C(45)-C(46) | 120.8(9) |
| C(41)-C(46)-C(45) | 120.6(8) | Cl(3)-C(99)-Cl(5) | 110.2(4) |
| Cl(4)-C(99)-Cl(3) | 110.7(4) | Cl(4)-C(99)-Cl(5) | 110.5(5) |

---

### 8.3. Single Crystal Structure Analysis of **4**, **1**·*n*-Pentane

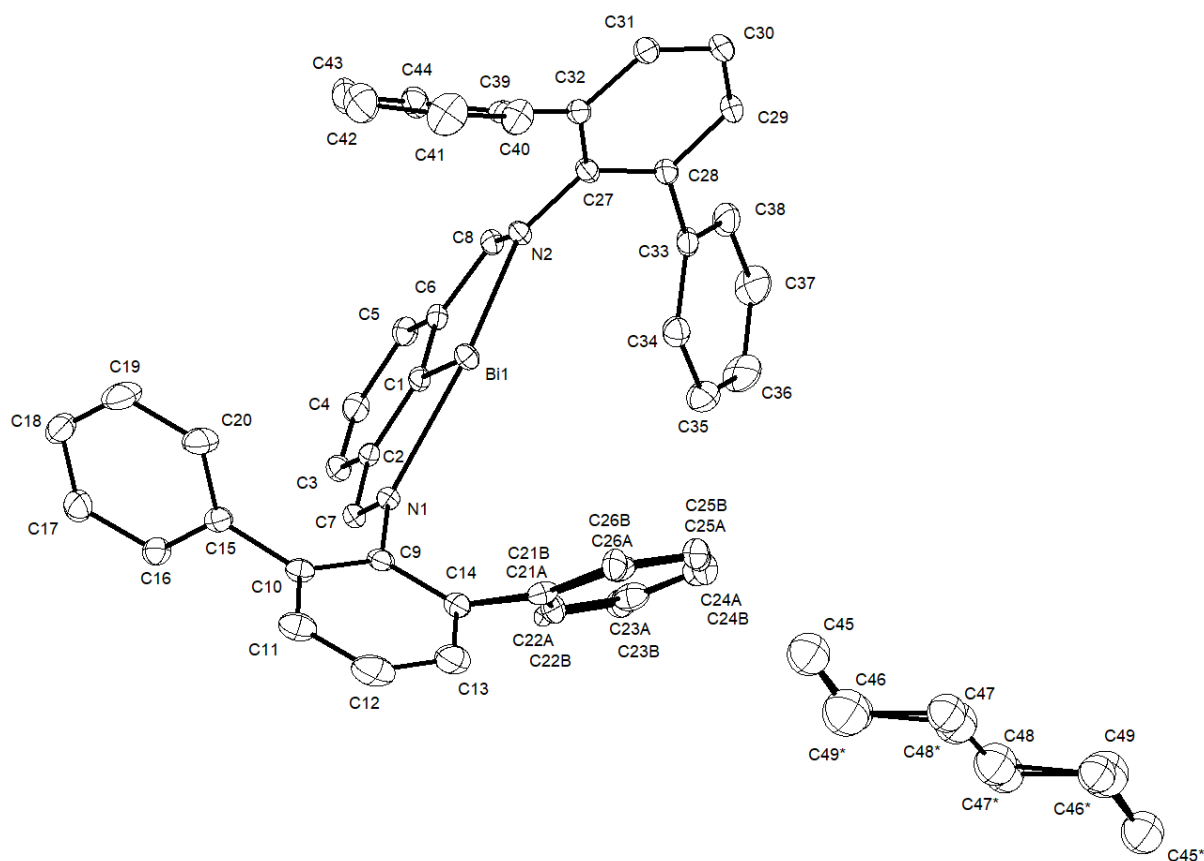

**Figure S3.** The molecular structure of complex **4** **1**·*n*-pentane. H atoms have been removed for clarity.

**X-ray Crystal Structure Analysis of complex **4** **1**·*n*-Pentane:**  $C_{46.50}H_{37}BiN_2$ ,  $M_r = 832.76$  g mol<sup>-1</sup>, red plate, crystal size 0.067 x 0.037 x 0.012 mm<sup>3</sup>, triclinic, space group *P*1 [2],  $a = 11.4047(5)$  Å,  $b = 12.3940(5)$  Å,  $c = 14.2472(6)$  Å,  $\alpha = 71.805(2)^\circ$ ,  $\beta = 69.902(2)^\circ$ ,  $\gamma = 75.783(2)^\circ$ ,  $V = 1774.93(13)$  Å<sup>3</sup>,  $T = 100(2)$  K,  $Z = 2$ ,  $D_{calc} = 1.558$  g·cm<sup>3</sup>,  $\lambda = 0.71073$  Å,  $\mu(Mo-K\alpha) = 5.003$  mm<sup>-1</sup>, analytical absorption correction ( $T_{min} = 0.77530$ ,  $T_{max} = 0.95494$ ), Bruker-AXS Kappa Mach3 with APEX-II detector and I $\mu$ S micro focus source,  $1.751 < \theta < 34.091^\circ$ , 68161 measured reflections, 14308 independent reflections, 12427 reflections with  $I > 2\sigma(I)$ ,  $R_{int} = 0.0361$ . The structure was solved by *SHELXT* and refined by full-matrix least-squares (*SHELXL*) against  $F^2$  to  $R_1 = 0.0272$  [ $I > 2\sigma(I)$ ],  $wR_2 = 0.0498$ , 500 parameters.

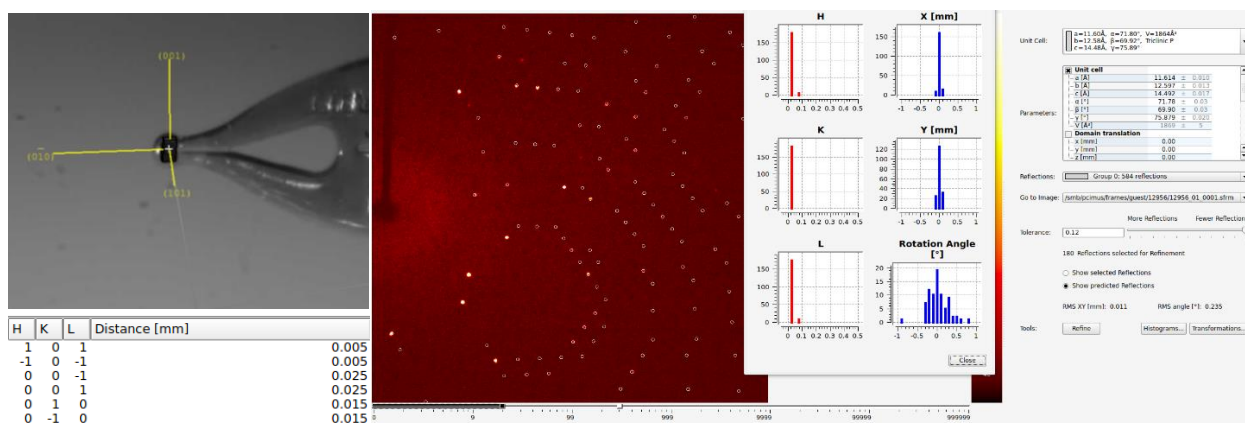

## INTENSITY STATISTICS FOR DATASET

| Resolution  | #Data | #Theory | %Complete | Redundancy | Mean I | Mean I/s | Rmerge | Rsigma |
|-------------|-------|---------|-----------|------------|--------|----------|--------|--------|
| Inf - 2.59  | 215   | 215     | 100.0     | 9.48       | 137.25 | 112.43   | 0.0169 | 0.0074 |
| 2.59 - 1.73 | 507   | 507     | 100.0     | 9.50       | 91.06  | 95.73    | 0.0182 | 0.0086 |
| 1.73 - 1.37 | 724   | 724     | 100.0     | 9.48       | 61.74  | 79.15    | 0.0221 | 0.0103 |
| 1.37 - 1.20 | 713   | 713     | 100.0     | 9.16       | 48.75  | 66.26    | 0.0271 | 0.0125 |
| 1.20 - 1.09 | 721   | 721     | 100.0     | 8.50       | 40.01  | 54.41    | 0.0327 | 0.0152 |
| 1.09 - 1.01 | 730   | 730     | 100.0     | 6.26       | 34.42  | 40.35    | 0.0374 | 0.0213 |
| 1.01 - 0.95 | 719   | 719     | 100.0     | 5.20       | 29.24  | 32.36    | 0.0427 | 0.0270 |
| 0.95 - 0.90 | 772   | 772     | 100.0     | 4.48       | 24.34  | 25.58    | 0.0520 | 0.0342 |
| 0.90 - 0.86 | 747   | 747     | 100.0     | 4.05       | 22.33  | 22.19    | 0.0517 | 0.0396 |
| 0.86 - 0.83 | 654   | 654     | 100.0     | 3.90       | 18.71  | 18.51    | 0.0595 | 0.0471 |
| 0.83 - 0.80 | 770   | 770     | 100.0     | 3.68       | 17.98  | 17.01    | 0.0653 | 0.0524 |
| 0.80 - 0.77 | 862   | 862     | 100.0     | 3.59       | 15.53  | 14.51    | 0.0730 | 0.0615 |
| 0.77 - 0.75 | 674   | 674     | 100.0     | 3.42       | 14.84  | 13.46    | 0.0789 | 0.0683 |
| 0.75 - 0.73 | 749   | 749     | 100.0     | 3.32       | 12.86  | 11.37    | 0.0903 | 0.0792 |
| 0.73 - 0.71 | 834   | 835     | 99.9      | 3.20       | 11.40  | 10.04    | 0.1024 | 0.0918 |
| 0.71 - 0.70 | 445   | 446     | 99.8      | 3.16       | 11.19  | 9.67     | 0.1125 | 0.0958 |
| 0.70 - 0.68 | 966   | 973     | 99.3      | 2.99       | 9.40   | 8.13     | 0.1234 | 0.1150 |
| 0.68 - 0.67 | 546   | 549     | 99.5      | 2.93       | 8.50   | 7.33     | 0.1442 | 0.1304 |
| 0.67 - 0.66 | 562   | 567     | 99.1      | 2.90       | 7.62   | 6.60     | 0.1545 | 0.1441 |
| 0.66 - 0.64 | 1215  | 1256    | 96.7      | 2.55       | 7.19   | 5.78     | 0.1723 | 0.1706 |
| 0.64 - 0.63 | 184   | 403     | 45.7      | 0.69       | 6.39   | 3.54     | 0.2004 | 0.2646 |
| 0.73 - 0.63 | 4752  | 5029    | 94.5      | 2.73       | 8.92   | 7.56     | 0.1315 | 0.1278 |
| Inf - 0.63  | 14309 | 14586   | 98.1      | 4.67       | 25.66  | 27.73    | 0.0358 | 0.0363 |

One low-angle reflection [0 0 1] was shadowed by the beamstop and removed from the data set before the final refinement cycles. One phenyl ring shows disorder over two positions with 50:50 occupancy. The structure contains an *n*-pentane molecule disordered about a crystallographic special position (inversion centre) with 50:50 occupancy.

Complete .cif-data of the compound are available under the CCDC number **CCDC-2031445**.

**Table S7. Crystal data and structure refinement.**

|                                                     |                                                          |                                                                           |
|-----------------------------------------------------|----------------------------------------------------------|---------------------------------------------------------------------------|
| Identification code                                 | 12956                                                    |                                                                           |
| Empirical formula                                   | C <sub>46.50</sub> H <sub>37</sub> BiN <sub>2</sub>      |                                                                           |
| Color                                               | red                                                      |                                                                           |
| Formula weight                                      | 832.76 g·mol <sup>-1</sup>                               |                                                                           |
| Temperature                                         | 100(2) K                                                 |                                                                           |
| Wavelength                                          | 0.71073 Å                                                |                                                                           |
| Crystal system                                      | Triclinic                                                |                                                                           |
| Space group                                         | <i>P</i> $\bar{1}$ , (No. 2)                             |                                                                           |
| Unit cell dimensions                                | a = 11.4047(5) Å<br>b = 12.3940(5) Å<br>c = 14.2472(6) Å | $\alpha$ = 71.805(2)°.<br>$\beta$ = 69.902(2)°.<br>$\gamma$ = 75.783(2)°. |
| Volume                                              | 1774.93(13) Å <sup>3</sup>                               |                                                                           |
| Z                                                   | 2                                                        |                                                                           |
| Density (calculated)                                | 1.558 Mg·m <sup>-3</sup>                                 |                                                                           |
| Absorption coefficient                              | 5.003 mm <sup>-1</sup>                                   |                                                                           |
| F(000)                                              | 826 e                                                    |                                                                           |
| Crystal size                                        | 0.067 x 0.037 x 0.012 mm <sup>3</sup>                    |                                                                           |
| $\theta$ range for data collection                  | 1.751 to 34.091°.                                        |                                                                           |
| Index ranges                                        | -17 ≤ h ≤ 17, -19 ≤ k ≤ 19, -22 ≤ l ≤ 22                 |                                                                           |
| Reflections collected                               | 68161                                                    |                                                                           |
| Independent reflections                             | 14308 [ <i>R</i> <sub>int</sub> = 0.0361]                |                                                                           |
| Reflections with <i>I</i> > 2σ( <i>I</i> )          | 12427                                                    |                                                                           |
| Completeness to $\theta = 25.242^\circ$             | 100.0 %                                                  |                                                                           |
| Absorption correction                               | Gaussian                                                 |                                                                           |
| Max. and min. transmission                          | 0.95494 and 0.77530                                      |                                                                           |
| Refinement method                                   | Full-matrix least-squares on <i>F</i> <sup>2</sup>       |                                                                           |
| Data / restraints / parameters                      | 14308 / 0 / 500                                          |                                                                           |
| Goodness-of-fit on <i>F</i> <sup>2</sup>            | 1.050                                                    |                                                                           |
| Final <i>R</i> indices [ <i>I</i> > 2σ( <i>I</i> )] | <i>R</i> <sub>1</sub> = 0.0272                           | w <i>R</i> <sup>2</sup> = 0.0498                                          |
| <i>R</i> indices (all data)                         | <i>R</i> <sub>1</sub> = 0.0374                           | w <i>R</i> <sup>2</sup> = 0.0521                                          |
| Extinction coefficient                              | n/a                                                      |                                                                           |
| Largest diff. peak and hole                         | 1.244 and -1.359 e·Å <sup>-3</sup>                       |                                                                           |

**Table S8. Bond lengths [Å] and angles [°].**

|              |            |              |            |
|--------------|------------|--------------|------------|
| Bi(1)-N(1)   | 2.4601(15) | Bi(1)-N(2)   | 2.5066(15) |
| Bi(1)-C(1)   | 2.1487(19) | N(1)-C(7)    | 1.301(3)   |
| N(1)-C(9)    | 1.420(2)   | N(2)-C(8)    | 1.300(2)   |
| N(2)-C(27)   | 1.425(2)   | C(1)-C(2)    | 1.412(2)   |
| C(1)-C(6)    | 1.410(3)   | C(2)-C(3)    | 1.403(3)   |
| C(2)-C(7)    | 1.437(3)   | C(3)-H(3)    | 0.9500     |
| C(3)-C(4)    | 1.388(3)   | C(4)-H(4)    | 0.9500     |
| C(4)-C(5)    | 1.398(3)   | C(5)-H(5)    | 0.9500     |
| C(5)-C(6)    | 1.397(3)   | C(6)-C(8)    | 1.443(2)   |
| C(7)-H(7)    | 0.9500     | C(8)-H(8)    | 0.9500     |
| C(9)-C(10)   | 1.406(3)   | C(9)-C(14)   | 1.409(3)   |
| C(10)-C(11)  | 1.397(3)   | C(10)-C(15)  | 1.496(3)   |
| C(11)-H(11)  | 0.9500     | C(11)-C(12)  | 1.386(3)   |
| C(12)-H(12)  | 0.9500     | C(12)-C(13)  | 1.379(4)   |
| C(13)-H(13)  | 0.9500     | C(13)-C(14)  | 1.387(3)   |
| C(14)-C(21A) | 1.611(8)   | C(14)-C(21B) | 1.395(10)  |
| C(15)-C(20)  | 1.387(3)   | C(15)-C(16)  | 1.391(3)   |
| C(20)-H(20)  | 0.9500     | C(20)-C(19)  | 1.392(4)   |
| C(19)-H(19)  | 0.9500     | C(19)-C(18)  | 1.376(4)   |
| C(18)-H(18)  | 0.9500     | C(18)-C(17)  | 1.382(3)   |
| C(17)-H(17)  | 0.9500     | C(17)-C(16)  | 1.391(3)   |
| C(16)-H(16)  | 0.9500     | C(27)-C(28)  | 1.416(3)   |
| C(27)-C(32)  | 1.405(3)   | C(28)-C(29)  | 1.400(3)   |
| C(28)-C(33)  | 1.493(3)   | C(29)-H(29)  | 0.9500     |
| C(29)-C(30)  | 1.379(3)   | C(30)-H(30)  | 0.9500     |
| C(30)-C(31)  | 1.381(3)   | C(31)-H(31)  | 0.9500     |
| C(31)-C(32)  | 1.400(3)   | C(33)-C(34)  | 1.401(3)   |
| C(33)-C(38)  | 1.394(3)   | C(34)-H(34)  | 0.9500     |
| C(34)-C(35)  | 1.384(3)   | C(35)-H(35)  | 0.9500     |
| C(35)-C(36)  | 1.383(3)   | C(36)-H(36)  | 0.9500     |
| C(36)-C(37)  | 1.377(4)   | C(37)-H(37)  | 0.9500     |
| C(37)-C(38)  | 1.396(3)   | C(38)-H(38)  | 0.9500     |
| C(39)-C(40)  | 1.403(3)   | C(39)-C(44)  | 1.391(3)   |
| C(39)-C(32)  | 1.490(3)   | C(40)-H(40)  | 0.9500     |
| C(40)-C(41)  | 1.390(3)   | C(41)-H(41)  | 0.9500     |
| C(41)-C(42)  | 1.385(4)   | C(42)-H(42)  | 0.9500     |

|                  |            |                 |            |
|------------------|------------|-----------------|------------|
| C(42)-C(43)      | 1.391(4)   | C(43)-H(43)     | 0.9500     |
| C(43)-C(44)      | 1.385(3)   | C(44)-H(44)     | 0.9500     |
| C(21A)-C(22A)    | 1.372(9)   | C(21A)-C(26A)   | 1.397(11)  |
| C(22A)-H(22A)    | 0.9500     | C(22A)-C(23A)   | 1.427(11)  |
| C(23A)-H(23A)    | 0.9500     | C(23A)-C(24A)   | 1.369(9)   |
| C(24A)-H(24A)    | 0.9500     | C(24A)-C(25A)   | 1.366(10)  |
| C(25A)-H(25A)    | 0.9500     | C(25A)-C(26A)   | 1.413(10)  |
| C(26A)-H(26A)    | 0.9500     | C(21B)-C(22B)   | 1.397(10)  |
| C(21B)-C(26B)    | 1.374(11)  | C(22B)-H(22B)   | 0.9500     |
| C(22B)-C(23B)    | 1.367(13)  | C(23B)-H(23B)   | 0.9500     |
| C(23B)-C(24B)    | 1.390(9)   | C(24B)-H(24B)   | 0.9500     |
| C(24B)-C(25B)    | 1.376(8)   | C(25B)-H(25B)   | 0.9500     |
| C(25B)-C(26B)    | 1.394(9)   | C(26B)-H(26B)   | 0.9500     |
| C(48)-H(48A)     | 0.9900     | C(48)-H(48B)    | 0.9900     |
| C(48)-C(49)      | 1.514(10)  | C(48)-C(47)     | 1.424(9)   |
| C(46)-H(46A)     | 0.9900     | C(46)-H(46B)    | 0.9900     |
| C(46)-C(45)      | 1.470(8)   | C(46)-C(47)     | 1.543(9)   |
| C(45)-H(45A)     | 0.9800     | C(45)-H(45B)    | 0.9800     |
| C(45)-H(45C)     | 0.9800     | C(49)-H(49A)    | 0.9800     |
| C(49)-H(49B)     | 0.9800     | C(49)-H(49C)    | 0.9800     |
| C(47)-H(47A)     | 0.9900     | C(47)-H(47B)    | 0.9900     |
|                  |            |                 |            |
| N(1)-Bi(1)-N(2)  | 142.49(5)  | C(1)-Bi(1)-N(1) | 71.44(6)   |
| C(1)-Bi(1)-N(2)  | 71.22(6)   | C(7)-N(1)-Bi(1) | 112.81(12) |
| C(7)-N(1)-C(9)   | 120.80(15) | C(9)-N(1)-Bi(1) | 126.36(12) |
| C(8)-N(2)-Bi(1)  | 111.50(11) | C(8)-N(2)-C(27) | 118.65(16) |
| C(27)-N(2)-Bi(1) | 128.22(12) | C(2)-C(1)-Bi(1) | 120.12(14) |
| C(6)-C(1)-Bi(1)  | 120.69(13) | C(6)-C(1)-C(2)  | 119.18(17) |
| C(1)-C(2)-C(7)   | 117.06(17) | C(3)-C(2)-C(1)  | 119.77(17) |
| C(3)-C(2)-C(7)   | 123.14(17) | C(2)-C(3)-H(3)  | 119.8      |
| C(4)-C(3)-C(2)   | 120.41(17) | C(4)-C(3)-H(3)  | 119.8      |
| C(3)-C(4)-H(4)   | 119.8      | C(3)-C(4)-C(5)  | 120.31(18) |
| C(5)-C(4)-H(4)   | 119.8      | C(4)-C(5)-H(5)  | 120.0      |
| C(6)-C(5)-C(4)   | 119.99(18) | C(6)-C(5)-H(5)  | 120.0      |
| C(1)-C(6)-C(8)   | 117.24(17) | C(5)-C(6)-C(1)  | 120.33(17) |
| C(5)-C(6)-C(8)   | 122.35(17) | N(1)-C(7)-C(2)  | 118.49(16) |
| N(1)-C(7)-H(7)   | 120.8      | C(2)-C(7)-H(7)  | 120.8      |
| N(2)-C(8)-C(6)   | 119.25(17) | N(2)-C(8)-H(8)  | 120.4      |



|                    |            |                    |            |
|--------------------|------------|--------------------|------------|
| C(6)-C(8)-H(8)     | 120.4      | C(10)-C(9)-N(1)    | 120.57(17) |
| C(10)-C(9)-C(14)   | 120.43(19) | C(14)-C(9)-N(1)    | 118.82(17) |
| C(9)-C(10)-C(15)   | 122.13(17) | C(11)-C(10)-C(9)   | 118.43(19) |
| C(11)-C(10)-C(15)  | 119.34(18) | C(10)-C(11)-H(11)  | 119.5      |
| C(12)-C(11)-C(10)  | 121.1(2)   | C(12)-C(11)-H(11)  | 119.5      |
| C(11)-C(12)-H(12)  | 120.0      | C(13)-C(12)-C(11)  | 120.1(2)   |
| C(13)-C(12)-H(12)  | 120.0      | C(12)-C(13)-H(13)  | 119.6      |
| C(12)-C(13)-C(14)  | 120.8(2)   | C(14)-C(13)-H(13)  | 119.6      |
| C(9)-C(14)-C(21A)  | 116.2(3)   | C(13)-C(14)-C(9)   | 119.2(2)   |
| C(13)-C(14)-C(21A) | 124.3(4)   | C(13)-C(14)-C(21B) | 115.1(4)   |
| C(21B)-C(14)-C(9)  | 125.3(4)   | C(20)-C(15)-C(10)  | 119.21(19) |
| C(20)-C(15)-C(16)  | 118.2(2)   | C(16)-C(15)-C(10)  | 122.42(17) |
| C(15)-C(20)-H(20)  | 119.5      | C(15)-C(20)-C(19)  | 121.0(2)   |
| C(19)-C(20)-H(20)  | 119.5      | C(20)-C(19)-H(19)  | 119.9      |
| C(18)-C(19)-C(20)  | 120.1(2)   | C(18)-C(19)-H(19)  | 119.9      |
| C(19)-C(18)-H(18)  | 120.2      | C(19)-C(18)-C(17)  | 119.7(2)   |
| C(17)-C(18)-H(18)  | 120.2      | C(18)-C(17)-H(17)  | 119.9      |
| C(18)-C(17)-C(16)  | 120.2(2)   | C(16)-C(17)-H(17)  | 119.9      |
| C(15)-C(16)-H(16)  | 119.6      | C(17)-C(16)-C(15)  | 120.8(2)   |
| C(17)-C(16)-H(16)  | 119.6      | C(28)-C(27)-N(2)   | 119.85(17) |
| C(32)-C(27)-N(2)   | 119.68(16) | C(32)-C(27)-C(28)  | 120.34(16) |
| C(27)-C(28)-C(33)  | 123.67(16) | C(29)-C(28)-C(27)  | 118.25(18) |
| C(29)-C(28)-C(33)  | 117.81(17) | C(28)-C(29)-H(29)  | 119.3      |
| C(30)-C(29)-C(28)  | 121.45(19) | C(30)-C(29)-H(29)  | 119.3      |
| C(29)-C(30)-H(30)  | 120.1      | C(29)-C(30)-C(31)  | 119.83(18) |
| C(31)-C(30)-H(30)  | 120.1      | C(30)-C(31)-H(31)  | 119.5      |
| C(30)-C(31)-C(32)  | 121.05(19) | C(32)-C(31)-H(31)  | 119.5      |
| C(34)-C(33)-C(28)  | 121.17(18) | C(38)-C(33)-C(28)  | 120.41(18) |
| C(38)-C(33)-C(34)  | 118.20(19) | C(33)-C(34)-H(34)  | 119.6      |
| C(35)-C(34)-C(33)  | 120.8(2)   | C(35)-C(34)-H(34)  | 119.6      |
| C(34)-C(35)-H(35)  | 119.8      | C(36)-C(35)-C(34)  | 120.3(2)   |
| C(36)-C(35)-H(35)  | 119.8      | C(35)-C(36)-H(36)  | 120.1      |
| C(37)-C(36)-C(35)  | 119.8(2)   | C(37)-C(36)-H(36)  | 120.1      |
| C(36)-C(37)-H(37)  | 119.9      | C(36)-C(37)-C(38)  | 120.3(2)   |
| C(38)-C(37)-H(37)  | 119.9      | C(33)-C(38)-C(37)  | 120.6(2)   |
| C(33)-C(38)-H(38)  | 119.7      | C(37)-C(38)-H(38)  | 119.7      |
| C(40)-C(39)-C(32)  | 118.93(18) | C(44)-C(39)-C(40)  | 118.06(19) |
| C(44)-C(39)-C(32)  | 122.92(19) | C(39)-C(40)-H(40)  | 119.6      |

|                      |            |                      |            |
|----------------------|------------|----------------------|------------|
| C(41)-C(40)-C(39)    | 120.8(2)   | C(41)-C(40)-H(40)    | 119.6      |
| C(40)-C(41)-H(41)    | 119.9      | C(42)-C(41)-C(40)    | 120.2(2)   |
| C(42)-C(41)-H(41)    | 119.9      | C(41)-C(42)-H(42)    | 120.3      |
| C(41)-C(42)-C(43)    | 119.4(2)   | C(43)-C(42)-H(42)    | 120.3      |
| C(42)-C(43)-H(43)    | 119.9      | C(44)-C(43)-C(42)    | 120.2(2)   |
| C(44)-C(43)-H(43)    | 119.9      | C(39)-C(44)-H(44)    | 119.4      |
| C(43)-C(44)-C(39)    | 121.2(2)   | C(43)-C(44)-H(44)    | 119.4      |
| C(27)-C(32)-C(39)    | 123.34(16) | C(31)-C(32)-C(27)    | 118.87(18) |
| C(31)-C(32)-C(39)    | 117.78(17) | C(22A)-C(21A)-C(14)  | 124.5(7)   |
| C(22A)-C(21A)-C(26A) | 119.0(7)   | C(26A)-C(21A)-C(14)  | 116.4(5)   |
| C(21A)-C(22A)-H(22A) | 119.7      | C(21A)-C(22A)-C(23A) | 120.7(6)   |
| C(23A)-C(22A)-H(22A) | 119.7      | C(22A)-C(23A)-H(23A) | 120.4      |
| C(24A)-C(23A)-C(22A) | 119.2(6)   | C(24A)-C(23A)-H(23A) | 120.4      |
| C(23A)-C(24A)-H(24A) | 119.5      | C(25A)-C(24A)-C(23A) | 121.0(6)   |
| C(25A)-C(24A)-H(24A) | 119.5      | C(24A)-C(25A)-H(25A) | 120.0      |
| C(24A)-C(25A)-C(26A) | 120.0(6)   | C(26A)-C(25A)-H(25A) | 120.0      |
| C(21A)-C(26A)-C(25A) | 120.0(6)   | C(21A)-C(26A)-H(26A) | 120.0      |
| C(25A)-C(26A)-H(26A) | 120.0      | C(14)-C(21B)-C(22B)  | 116.4(7)   |
| C(26B)-C(21B)-C(14)  | 126.1(5)   | C(26B)-C(21B)-C(22B) | 117.4(9)   |
| C(21B)-C(22B)-H(22B) | 118.6      | C(23B)-C(22B)-C(21B) | 122.8(7)   |
| C(23B)-C(22B)-H(22B) | 118.6      | C(22B)-C(23B)-H(23B) | 120.4      |
| C(22B)-C(23B)-C(24B) | 119.2(6)   | C(24B)-C(23B)-H(23B) | 120.4      |
| C(23B)-C(24B)-H(24B) | 120.5      | C(25B)-C(24B)-C(23B) | 118.9(7)   |
| C(25B)-C(24B)-H(24B) | 120.5      | C(24B)-C(25B)-H(25B) | 119.4      |
| C(24B)-C(25B)-C(26B) | 121.2(7)   | C(26B)-C(25B)-H(25B) | 119.4      |
| C(21B)-C(26B)-C(25B) | 120.4(6)   | C(21B)-C(26B)-H(26B) | 119.8      |
| C(25B)-C(26B)-H(26B) | 119.8      | H(48A)-C(48)-H(48B)  | 107.0      |
| C(49)-C(48)-H(48A)   | 107.6      | C(49)-C(48)-H(48B)   | 107.6      |
| C(47)-C(48)-H(48A)   | 107.6      | C(47)-C(48)-H(48B)   | 107.6      |
| C(47)-C(48)-C(49)    | 118.9(5)   | H(46A)-C(46)-H(46B)  | 107.2      |
| C(45)-C(46)-H(46A)   | 107.9      | C(45)-C(46)-H(46B)   | 107.9      |
| C(45)-C(46)-C(47)    | 117.5(5)   | C(47)-C(46)-H(46A)   | 107.9      |
| C(47)-C(46)-H(46B)   | 107.9      | C(46)-C(45)-H(45A)   | 109.5      |
| C(46)-C(45)-H(45B)   | 109.5      | C(46)-C(45)-H(45C)   | 109.5      |
| H(45A)-C(45)-H(45B)  | 109.5      | H(45A)-C(45)-H(45C)  | 109.5      |
| H(45B)-C(45)-H(45C)  | 109.5      | C(48)-C(49)-H(49A)   | 109.5      |
| C(48)-C(49)-H(49B)   | 109.5      | C(48)-C(49)-H(49C)   | 109.5      |
| H(49A)-C(49)-H(49B)  | 109.5      | H(49A)-C(49)-H(49C)  | 109.5      |

|                     |       |                    |          |
|---------------------|-------|--------------------|----------|
| H(49B)-C(49)-H(49C) | 109.5 | C(48)-C(47)-C(46)  | 120.3(5) |
| C(48)-C(47)-H(47A)  | 107.3 | C(48)-C(47)-H(47B) | 107.3    |
| C(46)-C(47)-H(47A)  | 107.3 | C(46)-C(47)-H(47B) | 107.3    |
| H(47A)-C(47)-H(47B) | 106.9 |                    |          |

---

## 8.4. Single Crystal Structure Analysis of **5**

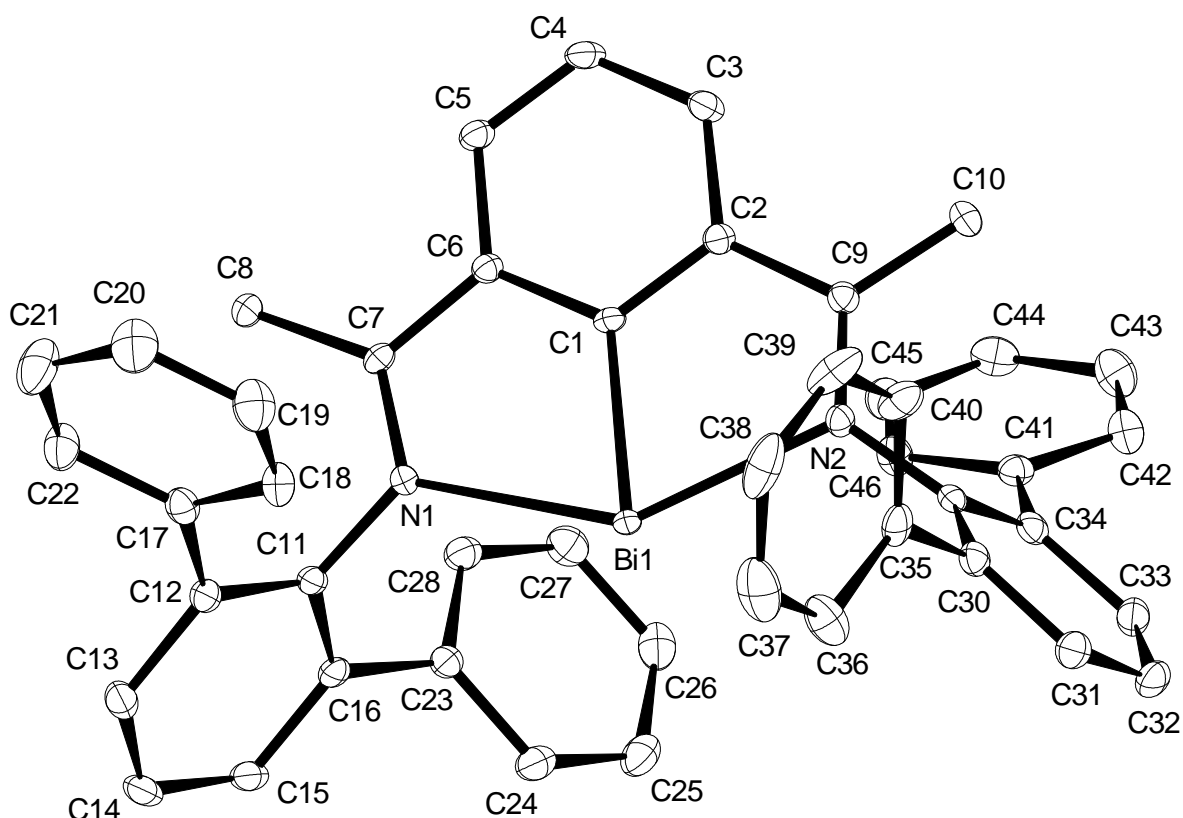

**Figure S4.** The molecular structure of complex **5**. H atoms have been removed for clarity.

**X-ray Crystal Structure Analysis of complex **5****  $C_{46}H_{35}BiN_2$ ,  $M_r = 824.74 \text{ g mol}^{-1}$ , dark brown prism, crystal size  $0.23 \times 0.17 \times 0.10 \text{ mm}^3$ , triclinic,  $P1 [2]$ ,  $a = 11.5135(13) \text{ \AA}$ ,  $b = 11.9576(6) \text{ \AA}$ ,  $c = 13.7914(16) \text{ \AA}$ ,  $\alpha = 88.445(7)^\circ$ ,  $\beta = 73.593(11)^\circ$ ,  $\gamma = 78.419(7)^\circ$ ,  $V = 1783.4(3) \text{ \AA}^3$ ,  $T = 100(2) \text{ K}$ ,  $Z = 2$ ,  $D_{calc} = 1.536 \text{ g cm}^{-3}$ ,  $\lambda = 0.71073 \text{ \AA}$ ,  $\mu(Mo-K\alpha) = 4.978 \text{ mm}^{-1}$ , analytical absorption correction ( $T_{min} = 0.35936$ ,  $T_{max} = 0.64959$ ), Bruker AXS Enraf-Nonius KappaCCD diffractometer with a FR591 rotating Mo-anode X-ray source,  $2.749 < \theta < 27.500^\circ$ , 37792 measured reflections, 8180 independent reflections, 7986 reflections with  $I > 2\sigma(I)$ ,  $R_{int} = 0.0374$ . The structure was solved by *SHELXS* and refined by full-matrix least-squares (*SHELXL*) against  $F^2$  to  $R_1 = 0.0177 [I > 2\sigma(I)]$ ,  $wR_2 = 0.0445$ , 444 parameters.

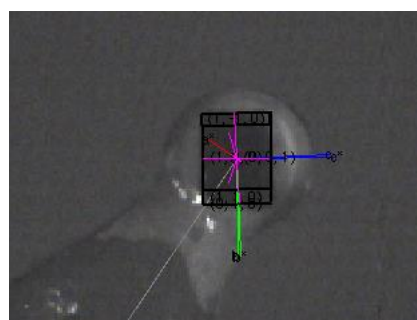

|    | h  | k  | l  | distance (mm) |
|----|----|----|----|---------------|
| 1. | 0  | 0  | -1 | 0.085         |
| 2. | 0  | 0  | 1  | 0.085         |
| 3. | 0  | -1 | 0  | 0.115         |
| 4. | 0  | 1  | 0  | 0.115         |
| 5. | -1 | 0  | 0  | 0.05          |
| 6. | 1  | 0  | 0  | 0.05          |
| 7. | 1  | -1 | 0  | 0.085         |
| 8. | 1  | 1  | 0  | 0.1           |

The automatic indexing gave these results:

```

[Input cell   : a=11.5181 b=11.9593 c=13.7966 alpha=88.389 beta=73.568 gamma=78.419 P
Reduced cell  : a=11.5181 b=11.9593 c=13.7966 alpha=88.389 beta=73.568 gamma=78.419
Conventional  : a=11.5181 b=11.9593 c=13.7966 alpha=88.389 beta=73.568 gamma=78.419 P
Volume        : 1784.89; System: triclinic; Point group: -1}
  
```

202 reflections from the peaklist fit this lattice, 0 do not

NDisplay: i07f0001.kcd

File Options Tools Imagefilters Help

Image max: 99048  
max: 1000  
Linear scale  
Logarithmic scale  
min: 0  
Image min: -1448  
Next file  
Previous file  
Next set  
Previous set  
Redisplay  
Quit

theta= 0.000  
dx= 40.000  
phi= 90.000  
omega= 171.931  
kappa= 24.860

## INTENSITY STATISTICS FOR DATASET

| Resolution  | #Data | #Theory | %Complete | Redundancy | Mean I | Mean I/s | Rmerge | Rsigma |
|-------------|-------|---------|-----------|------------|--------|----------|--------|--------|
| Inf - 2.22  | 333   | 343     | 97.1      | 4.47       | 202.93 | 43.10    | 0.0429 | 0.0238 |
| 2.22 - 1.49 | 783   | 783     | 100.0     | 5.09       | 149.07 | 44.48    | 0.0373 | 0.0208 |
| 1.49 - 1.19 | 1096  | 1096    | 100.0     | 5.15       | 100.69 | 41.53    | 0.0354 | 0.0212 |
| 1.19 - 1.03 | 1203  | 1203    | 100.0     | 4.97       | 78.22  | 38.55    | 0.0352 | 0.0224 |
| 1.03 - 0.94 | 1082  | 1082    | 100.0     | 4.69       | 63.43  | 35.28    | 0.0371 | 0.0240 |
| 0.94 - 0.87 | 1172  | 1172    | 100.0     | 4.45       | 50.21  | 31.60    | 0.0373 | 0.0261 |
| 0.87 - 0.82 | 1087  | 1087    | 100.0     | 4.25       | 43.70  | 30.11    | 0.0379 | 0.0281 |
| 0.82 - 0.78 | 1104  | 1104    | 100.0     | 4.05       | 36.74  | 27.20    | 0.0392 | 0.0308 |
| 0.78 - 0.75 | 969   | 969     | 100.0     | 3.87       | 34.78  | 25.55    | 0.0405 | 0.0326 |
| 0.75 - 0.72 | 1169  | 1169    | 100.0     | 3.67       | 30.47  | 22.95    | 0.0410 | 0.0356 |
| 0.72 - 0.69 | 1379  | 1379    | 100.0     | 3.54       | 26.00  | 20.92    | 0.0449 | 0.0393 |
| 0.69 - 0.67 | 1036  | 1036    | 100.0     | 3.40       | 23.63  | 19.54    | 0.0481 | 0.0429 |
| 0.67 - 0.65 | 1172  | 1172    | 100.0     | 3.22       | 21.03  | 17.77    | 0.0492 | 0.0472 |
| 0.65 - 0.63 | 1346  | 1346    | 100.0     | 3.08       | 18.45  | 16.24    | 0.0548 | 0.0525 |
| 0.63 - 0.62 | 728   | 729     | 99.9      | 2.95       | 17.40  | 14.83    | 0.0601 | 0.0575 |
| 0.62 - 0.60 | 1619  | 1623    | 99.8      | 2.84       | 16.12  | 13.77    | 0.0638 | 0.0617 |
| 0.60 - 0.59 | 919   | 922     | 99.7      | 2.72       | 13.83  | 12.36    | 0.0702 | 0.0698 |
| 0.59 - 0.58 | 912   | 914     | 99.8      | 2.59       | 12.58  | 11.23    | 0.0735 | 0.0777 |
| 0.58 - 0.57 | 1014  | 1016    | 99.8      | 2.60       | 12.11  | 10.97    | 0.0842 | 0.0805 |
| 0.57 - 0.56 | 1146  | 1149    | 99.7      | 2.41       | 11.16  | 9.83     | 0.0837 | 0.0921 |
| 0.56 - 0.55 | 810   | 837     | 96.8      | 2.29       | 9.73   | 8.70     | 0.0981 | 0.1073 |
| 0.65 - 0.55 | 8494  | 8536    | 99.5      | 2.71       | 14.21  | 12.48    | 0.0684 | 0.0698 |
| Inf - 0.55  | 22079 | 22131   | 99.8      | 3.61       | 39.83  | 22.94    | 0.0411 | 0.0326 |

Several low angle reflections were shadowed by beam stop and were removed from the data before the final refinement cycles.

Complete .cif-data of the compound are available under the CCDC number **CCDC-2031448**.

**Table S9. Crystal data and structure refinement.**

|                                   |                                                  |                          |
|-----------------------------------|--------------------------------------------------|--------------------------|
| Identification code               | 13192                                            |                          |
| Empirical formula                 | C <sub>46</sub> H <sub>35</sub> BiN <sub>2</sub> |                          |
| Color                             | dark brown                                       |                          |
| Formula weight                    | 824.74 g · mol <sup>-1</sup>                     |                          |
| Temperature                       | 100(2) K                                         |                          |
| Wavelength                        | 0.71073 Å                                        |                          |
| Crystal system                    | TRICLINIC                                        |                          |
| Space group                       | <i>P</i> 1, (No. 2)                              |                          |
| Unit cell dimensions              | a = 11.5135(13) Å                                | α = 88.445(7)°.          |
|                                   | b = 11.9576(6) Å                                 | β = 73.593(11)°.         |
|                                   | c = 13.7914(16) Å                                | γ = 78.419(7)°.          |
| Volume                            | 1783.4(3) Å <sup>3</sup>                         |                          |
| Z                                 | 2                                                |                          |
| Density (calculated)              | 1.536 Mg · m <sup>-3</sup>                       |                          |
| Absorption coefficient            | 4.978 mm <sup>-1</sup>                           |                          |
| F(000)                            | 816 e                                            |                          |
| Crystal size                      | 0.23 x 0.17 x 0.10 mm <sup>3</sup>               |                          |
| θ range for data collection       | 2.749 to 27.500°.                                |                          |
| Index ranges                      | -14 ≤ h ≤ 14, -15 ≤ k ≤ 15, -17 ≤ l ≤ 17         |                          |
| Reflections collected             | 37792                                            |                          |
| Independent reflections           | 8180 [R <sub>int</sub> = 0.0374]                 |                          |
| Reflections with I > 2σ(I)        | 7986                                             |                          |
| Completeness to θ = 25.242°       | 99.7 %                                           |                          |
| Absorption correction             | Gaussian                                         |                          |
| Max. and min. transmission        | 0.65 and 0.36                                    |                          |
| Refinement method                 | Full-matrix least-squares on F <sup>2</sup>      |                          |
| Data / restraints / parameters    | 8180 / 0 / 444                                   |                          |
| Goodness-of-fit on F <sup>2</sup> | 1.094                                            |                          |
| Final R indices [I > 2σ(I)]       | R <sub>1</sub> = 0.0177                          | wR <sup>2</sup> = 0.0445 |
| R indices (all data)              | R <sub>1</sub> = 0.0183                          | wR <sup>2</sup> = 0.0449 |
| Largest diff. peak and hole       | 1.3 and -1.5 e · Å <sup>-3</sup>                 |                          |

**Table S10. Bond lengths [Å] and angles [°].**

---

|                 |            |                  |            |
|-----------------|------------|------------------|------------|
| Bi(1)-N(1)      | 2.4621(15) | Bi(1)-N(2)       | 2.4552(16) |
| Bi(1)-C(1)      | 2.1503(18) | N(1)-C(7)        | 1.301(2)   |
| N(1)-C(11)      | 1.422(2)   | N(2)-C(9)        | 1.305(2)   |
| N(2)-C(29)      | 1.423(2)   | C(1)-C(2)        | 1.412(3)   |
| C(1)-C(6)       | 1.418(2)   | C(2)-C(3)        | 1.403(3)   |
| C(2)-C(9)       | 1.461(3)   | C(3)-C(4)        | 1.393(3)   |
| C(4)-C(5)       | 1.394(3)   | C(5)-C(6)        | 1.400(3)   |
| C(6)-C(7)       | 1.461(3)   | C(7)-C(8)        | 1.515(2)   |
| C(9)-C(10)      | 1.506(3)   | C(11)-C(12)      | 1.413(3)   |
| C(11)-C(16)     | 1.412(3)   | C(12)-C(13)      | 1.399(3)   |
| C(12)-C(17)     | 1.491(3)   | C(13)-C(14)      | 1.388(3)   |
| C(14)-C(15)     | 1.386(3)   | C(15)-C(16)      | 1.394(3)   |
| C(16)-C(23)     | 1.494(3)   | C(17)-C(18)      | 1.396(3)   |
| C(17)-C(22)     | 1.397(3)   | C(18)-C(19)      | 1.388(3)   |
| C(19)-C(20)     | 1.386(3)   | C(20)-C(21)      | 1.399(3)   |
| C(21)-C(22)     | 1.390(3)   | C(23)-C(24)      | 1.400(3)   |
| C(23)-C(28)     | 1.396(3)   | C(24)-C(25)      | 1.388(3)   |
| C(25)-C(26)     | 1.392(3)   | C(26)-C(27)      | 1.392(3)   |
| C(27)-C(28)     | 1.390(3)   | C(29)-C(30)      | 1.412(3)   |
| C(29)-C(34)     | 1.412(3)   | C(30)-C(31)      | 1.395(3)   |
| C(30)-C(35)     | 1.496(3)   | C(31)-C(32)      | 1.386(3)   |
| C(32)-C(33)     | 1.385(3)   | C(33)-C(34)      | 1.402(3)   |
| C(34)-C(41)     | 1.491(3)   | C(35)-C(36)      | 1.397(3)   |
| C(35)-C(40)     | 1.392(3)   | C(36)-C(37)      | 1.395(3)   |
| C(37)-C(38)     | 1.380(4)   | C(38)-C(39)      | 1.387(4)   |
| C(39)-C(40)     | 1.395(3)   | C(41)-C(42)      | 1.400(3)   |
| C(41)-C(46)     | 1.400(3)   | C(42)-C(43)      | 1.392(3)   |
| C(43)-C(44)     | 1.387(3)   | C(44)-C(45)      | 1.386(3)   |
| C(45)-C(46)     | 1.390(3)   |                  |            |
|                 |            |                  |            |
| N(2)-Bi(1)-N(1) | 142.37(5)  | C(1)-Bi(1)-N(1)  | 71.47(6)   |
| C(1)-Bi(1)-N(2) | 71.19(6)   | C(7)-N(1)-Bi(1)  | 114.06(12) |
| C(7)-N(1)-C(11) | 123.61(16) | C(11)-N(1)-Bi(1) | 122.33(11) |
| C(9)-N(2)-Bi(1) | 114.65(12) | C(9)-N(2)-C(29)  | 124.03(16) |

|                   |            |                   |            |
|-------------------|------------|-------------------|------------|
| C(29)-N(2)-Bi(1)  | 119.68(12) | C(2)-C(1)-Bi(1)   | 120.28(13) |
| C(2)-C(1)-C(6)    | 119.96(16) | C(6)-C(1)-Bi(1)   | 119.76(13) |
| C(1)-C(2)-C(9)    | 117.69(16) | C(3)-C(2)-C(1)    | 119.65(17) |
| C(3)-C(2)-C(9)    | 122.66(17) | C(4)-C(3)-C(2)    | 120.28(18) |
| C(3)-C(4)-C(5)    | 120.18(17) | C(4)-C(5)-C(6)    | 120.97(17) |
| C(1)-C(6)-C(7)    | 117.73(16) | C(5)-C(6)-C(1)    | 118.92(17) |
| C(5)-C(6)-C(7)    | 123.30(17) | N(1)-C(7)-C(6)    | 116.61(16) |
| N(1)-C(7)-C(8)    | 122.86(17) | C(6)-C(7)-C(8)    | 120.46(16) |
| N(2)-C(9)-C(2)    | 116.03(17) | N(2)-C(9)-C(10)   | 123.47(17) |
| C(2)-C(9)-C(10)   | 120.50(17) | C(12)-C(11)-N(1)  | 121.76(17) |
| C(16)-C(11)-N(1)  | 118.21(17) | C(16)-C(11)-C(12) | 119.87(17) |
| C(11)-C(12)-C(17) | 122.03(17) | C(13)-C(12)-C(11) | 118.96(18) |
| C(13)-C(12)-C(17) | 118.99(17) | C(14)-C(13)-C(12) | 121.26(18) |
| C(15)-C(14)-C(13) | 119.34(18) | C(14)-C(15)-C(16) | 121.47(19) |
| C(11)-C(16)-C(23) | 121.92(17) | C(15)-C(16)-C(11) | 119.06(18) |
| C(15)-C(16)-C(23) | 119.01(17) | C(18)-C(17)-C(12) | 120.73(18) |
| C(18)-C(17)-C(22) | 119.24(19) | C(22)-C(17)-C(12) | 119.98(18) |
| C(19)-C(18)-C(17) | 120.39(19) | C(20)-C(19)-C(18) | 120.2(2)   |
| C(19)-C(20)-C(21) | 119.9(2)   | C(22)-C(21)-C(20) | 119.9(2)   |
| C(21)-C(22)-C(17) | 120.4(2)   | C(24)-C(23)-C(16) | 119.82(18) |
| C(28)-C(23)-C(16) | 121.49(17) | C(28)-C(23)-C(24) | 118.66(18) |
| C(25)-C(24)-C(23) | 120.68(19) | C(24)-C(25)-C(26) | 120.24(19) |
| C(27)-C(26)-C(25) | 119.5(2)   | C(28)-C(27)-C(26) | 120.24(19) |
| C(27)-C(28)-C(23) | 120.66(18) | C(30)-C(29)-N(2)  | 118.49(17) |
| C(30)-C(29)-C(34) | 120.06(17) | C(34)-C(29)-N(2)  | 121.10(16) |
| C(29)-C(30)-C(35) | 121.91(17) | C(31)-C(30)-C(29) | 119.60(18) |
| C(31)-C(30)-C(35) | 118.46(17) | C(32)-C(31)-C(30) | 120.76(18) |
| C(33)-C(32)-C(31) | 119.45(18) | C(32)-C(33)-C(34) | 121.94(18) |
| C(29)-C(34)-C(41) | 123.90(17) | C(33)-C(34)-C(29) | 118.12(17) |
| C(33)-C(34)-C(41) | 117.98(17) | C(36)-C(35)-C(30) | 120.48(19) |
| C(40)-C(35)-C(30) | 120.79(18) | C(40)-C(35)-C(36) | 118.6(2)   |
| C(37)-C(36)-C(35) | 120.4(2)   | C(38)-C(37)-C(36) | 120.4(2)   |
| C(37)-C(38)-C(39) | 119.9(2)   | C(38)-C(39)-C(40) | 119.9(2)   |
| C(35)-C(40)-C(39) | 120.8(2)   | C(42)-C(41)-C(34) | 118.75(17) |
| C(46)-C(41)-C(34) | 123.07(18) | C(46)-C(41)-C(42) | 118.17(18) |
| C(43)-C(42)-C(41) | 121.12(19) | C(44)-C(43)-C(42) | 119.96(19) |
| C(45)-C(44)-C(43) | 119.42(19) | C(44)-C(45)-C(46) | 120.91(19) |
| C(45)-C(46)-C(41) | 120.34(19) |                   |            |



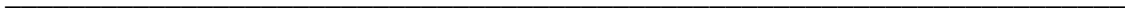

## 8.5. Single Crystal Structure Analysis of **6**, **3**·toluene

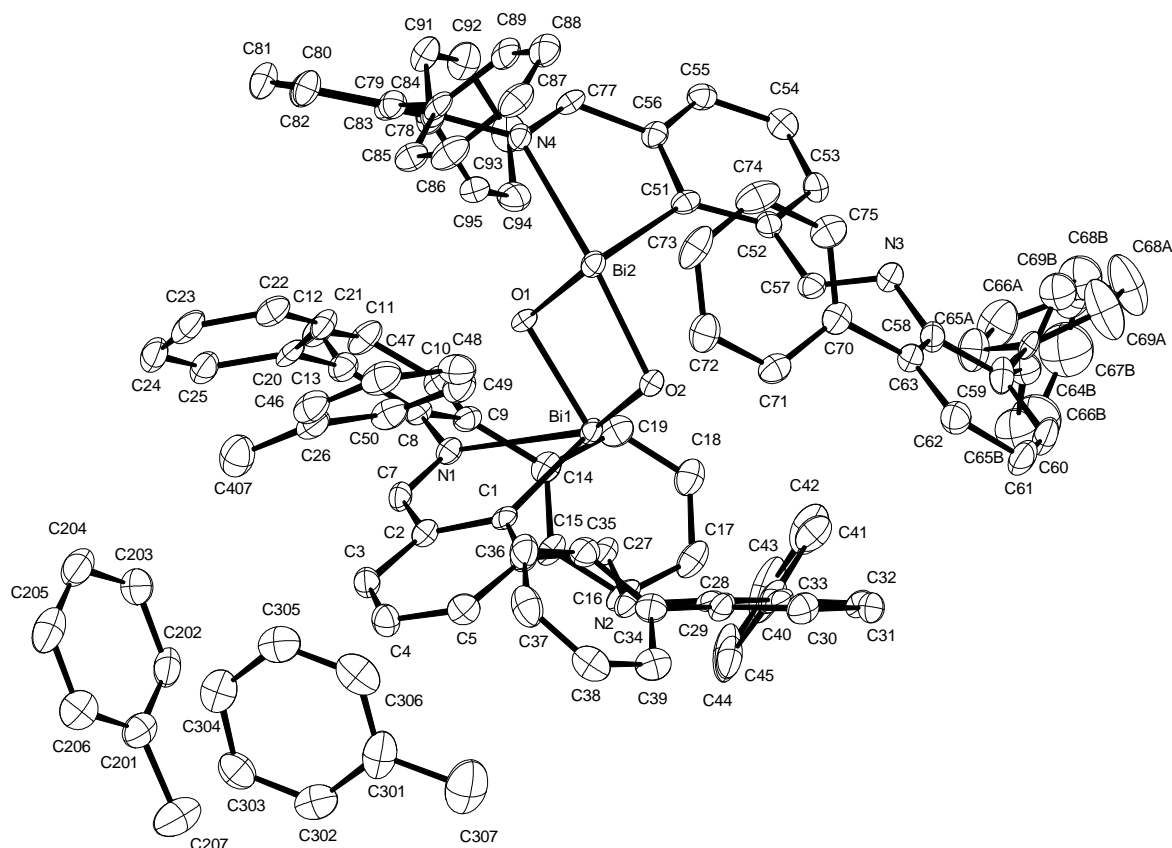

**Figure S5.** The molecular structure of complex **6 3**·toluene. H atoms have been removed for clarity.

**X-ray Crystal Structure Analysis of complex 6 3·Toluene:**  $C_{109}H_{86}Bi_2N_4O_2$ ,  $M_r = 1901.77$  g mol<sup>-1</sup>, yellow plate, crystal size 0.10 x 0.08 x 0.04 mm<sup>3</sup>, triclinic,  $P\bar{1}$  [2],  $a = 15.364(2)$  Å,  $b = 16.4700(12)$  Å,  $c = 19.869(2)$  Å,  $\alpha = 86.379(7)^\circ$ ,  $\beta = 67.786(8)^\circ$ ,  $\gamma = 84.375(8)^\circ$ ,  $V = 4630.2(9)$  Å<sup>3</sup>,  $T = 100(2)$  K,  $Z = 2$ ,  $D_{calc} = 1.364$  g·cm<sup>-3</sup>,  $\lambda = 0.71073$  Å,  $\mu(Mo-K\alpha) = 3.846$  mm<sup>-1</sup>, analytical absorption correction ( $T_{min} = 0.69230$ ,  $T_{max} = 0.86804$ ), Bruker AXS Enraf-Nonius KappaCCD diffractometer with a FR591 rotating Mo-anode X-ray source,  $2.664 < \theta < 27.499^\circ$ , 94882 measured reflections, 21180 independent reflections, 16659 reflections with  $I > 2\sigma(I)$ ,  $R_{int} = 0.0689$ . The structure was solved by *SHELXS* and refined by full-matrix least-squares (*SHELXL*) against  $F^2$  to  $R_1 = 0.0437$  [ $I > 2\sigma(I)$ ],  $wR_2 = 0.1012$ , 1081 parameters.

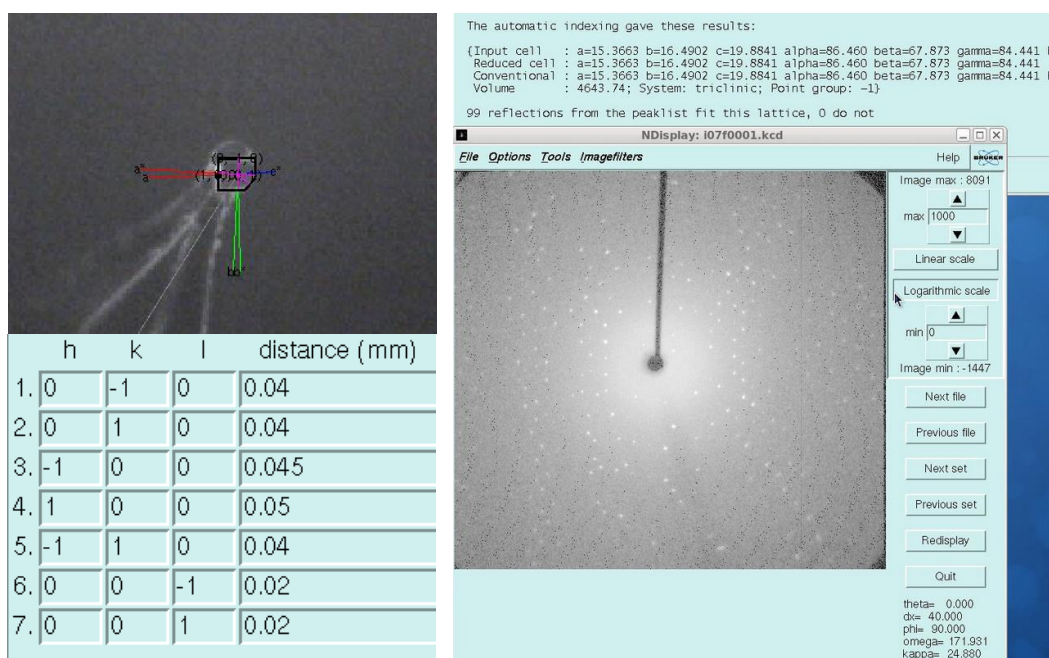

## INTENSITY STATISTICS FOR DATASET

| Resolution  | #Data | #Theory | %Complete | Redundancy | Mean I | Mean I/s | Rmerge | Rsigma |
|-------------|-------|---------|-----------|------------|--------|----------|--------|--------|
| Inf - 2.60  | 531   | 551     | 96.4      | 8.40       | 100.68 | 39.88    | 0.0560 | 0.0207 |
| 2.60 - 1.75 | 1256  | 1262    | 99.5      | 6.03       | 64.41  | 27.99    | 0.0535 | 0.0278 |
| 1.75 - 1.39 | 1774  | 1788    | 99.2      | 5.35       | 46.44  | 23.31    | 0.0562 | 0.0324 |
| 1.39 - 1.22 | 1751  | 1761    | 99.4      | 5.02       | 32.30  | 19.45    | 0.0563 | 0.0373 |
| 1.22 - 1.10 | 1903  | 1906    | 99.8      | 4.82       | 26.00  | 16.76    | 0.0609 | 0.0430 |
| 1.10 - 1.03 | 1596  | 1599    | 99.8      | 4.64       | 22.77  | 15.19    | 0.0656 | 0.0484 |
| 1.03 - 0.96 | 2076  | 2084    | 99.6      | 4.36       | 19.55  | 13.20    | 0.0755 | 0.0583 |
| 0.96 - 0.92 | 1491  | 1495    | 99.7      | 4.10       | 17.18  | 11.54    | 0.0850 | 0.0654 |
| 0.92 - 0.88 | 1802  | 1803    | 99.9      | 3.99       | 13.89  | 9.76     | 0.0957 | 0.0777 |
| 0.88 - 0.84 | 2127  | 2127    | 100.0     | 3.83       | 12.26  | 8.54     | 0.1067 | 0.0904 |
| 0.84 - 0.81 | 1865  | 1867    | 99.9      | 3.65       | 10.85  | 7.53     | 0.1242 | 0.1056 |
| 0.81 - 0.79 | 1436  | 1436    | 100.0     | 3.50       | 9.59   | 6.67     | 0.1373 | 0.1210 |
| 0.79 - 0.77 | 1547  | 1551    | 99.7      | 3.33       | 9.80   | 6.51     | 0.1379 | 0.1264 |
| 0.77 - 0.75 | 1771  | 1771    | 100.0     | 3.24       | 8.19   | 5.41     | 0.1717 | 0.1549 |
| 0.75 - 0.73 | 1955  | 1956    | 99.9      | 3.11       | 7.66   | 4.93     | 0.1814 | 0.1719 |
| 0.73 - 0.71 | 2147  | 2147    | 100.0     | 2.96       | 6.68   | 4.27     | 0.2027 | 0.2023 |
| 0.71 - 0.70 | 1167  | 1168    | 99.9      | 2.92       | 6.09   | 3.84     | 0.2194 | 0.2254 |
| 0.70 - 0.68 | 2583  | 2584    | 100.0     | 2.79       | 5.43   | 3.39     | 0.2414 | 0.2594 |
| 0.68 - 0.67 | 1375  | 1377    | 99.9      | 2.67       | 4.63   | 2.81     | 0.2894 | 0.3188 |
| 0.67 - 0.66 | 1481  | 1483    | 99.9      | 2.65       | 4.52   | 2.68     | 0.3009 | 0.3373 |
| 0.66 - 0.65 | 1585  | 1673    | 94.7      | 2.40       | 4.21   | 2.38     | 0.3134 | 0.3861 |
| 0.75 - 0.65 | 12293 | 12388   | 99.2      | 2.80       | 5.71   | 3.55     | 0.2327 | 0.2505 |
| Inf - 0.65  | 35219 | 35389   | 99.5      | 3.82       | 17.33  | 10.08    | 0.0802 | 0.0752 |

Several low-order reflections were shadowed by the beamstop and removed from the least-squares refinement. A resolution cut off (0.77 Å) was applied. The relatively poor crystal quality is reflected in the diffraction data, which do not allow an exact description of the disordered solute. To improve signal-to-noise ratio quality the SQUEEZE routine in PLATON was applied to dataset. This results in a residual electron density of 3.48 and -3.99 eÅ<sup>-3</sup> as well as a void volume of 506.21 Å<sup>3</sup> (10.9% of unit cell volume) using 1.2 Å probe radius and a 0.7 Å grid size (CCDC Mercury) after final refinement. The residual electron density of 3.48 and

-3.99 e·Å<sup>-3</sup> close to the Bi atom may be a result of anharmonic displacement of the heavy atom.  
Complete .cif-data of the compound are available under the CCDC number **CCDC-2031449**.

**Table S11. Crystal data and structure refinement.**

|                                   |                                                                                |                          |
|-----------------------------------|--------------------------------------------------------------------------------|--------------------------|
| Identification code               | 13008                                                                          |                          |
| Empirical formula                 | C <sub>109</sub> H <sub>86</sub> Bi <sub>2</sub> N <sub>4</sub> O <sub>2</sub> |                          |
| Color                             | yellow                                                                         |                          |
| Formula weight                    | 1901.77 g · mol <sup>-1</sup>                                                  |                          |
| Temperature                       | 100(2) K                                                                       |                          |
| Wavelength                        | 0.71073 Å                                                                      |                          |
| Crystal system                    | TRICLINIC                                                                      |                          |
| Space group                       | <i>P</i> 1, (No. 2)                                                            |                          |
| Unit cell dimensions              | a = 15.364(2) Å                                                                | α = 86.379(7)°.          |
|                                   | b = 16.4700(12) Å                                                              | β = 67.786(8)°.          |
|                                   | c = 19.869(2) Å                                                                | γ = 84.375(8)°.          |
| Volume                            | 4630.2(9) Å <sup>3</sup>                                                       |                          |
| Z                                 | 2                                                                              |                          |
| Density (calculated)              | 1.364 Mg · m <sup>-3</sup>                                                     |                          |
| Absorption coefficient            | 3.846 mm <sup>-1</sup>                                                         |                          |
| F(000)                            | 1900 e                                                                         |                          |
| Crystal size                      | 0.10 x 0.08 x 0.04 mm <sup>3</sup>                                             |                          |
| θ range for data collection       | 2.664 to 27.499°.                                                              |                          |
| Index ranges                      | -19 ≤ h ≤ 19, -21 ≤ k ≤ 21, -25 ≤ l ≤ 25                                       |                          |
| Reflections collected             | 94882                                                                          |                          |
| Independent reflections           | 21180 [R <sub>int</sub> = 0.0689]                                              |                          |
| Reflections with I > 2σ(I)        | 16659                                                                          |                          |
| Completeness to θ = 25.242°       | 99.6 %                                                                         |                          |
| Absorption correction             | Gaussian                                                                       |                          |
| Max. and min. transmission        | 0.87 and 0.69                                                                  |                          |
| Refinement method                 | Full-matrix least-squares on F <sup>2</sup>                                    |                          |
| Data / restraints / parameters    | 21180 / 0 / 1081                                                               |                          |
| Goodness-of-fit on F <sup>2</sup> | 1.049                                                                          |                          |
| Final R indices [I > 2σ(I)]       | R <sub>1</sub> = 0.0437                                                        | wR <sup>2</sup> = 0.1012 |
| R indices (all data)              | R <sub>1</sub> = 0.0609                                                        | wR <sup>2</sup> = 0.1104 |
| Remarks                           | Solvent accessible void with two disordered toluene was suppressed             |                          |
| Largest diff. peak and hole       | 2.8 and -2.6 e · Å <sup>-3</sup>                                               |                          |

**Table S12. Bond lengths [Å] and angles [°].**

---

|             |           |             |           |
|-------------|-----------|-------------|-----------|
| Bi(1)-Bi(2) | 3.2380(5) | Bi(1)-O(1)  | 2.103(3)  |
| Bi(1)-O(2)  | 2.120(3)  | Bi(1)-N(1)  | 2.672(4)  |
| Bi(1)-C(1)  | 2.300(5)  | Bi(2)-O(1)  | 2.104(3)  |
| Bi(2)-O(2)  | 2.129(3)  | Bi(2)-N(4)  | 2.648(4)  |
| Bi(2)-C(51) | 2.297(5)  | N(1)-C(7)   | 1.276(6)  |
| N(1)-C(8)   | 1.436(6)  | N(2)-C(27)  | 1.270(6)  |
| N(2)-C(28)  | 1.422(6)  | N(3)-C(57)  | 1.276(6)  |
| N(3)-C(58)  | 1.421(6)  | N(4)-C(77)  | 1.269(6)  |
| N(4)-C(78)  | 1.434(6)  | C(1)-C(2)   | 1.415(7)  |
| C(1)-C(6)   | 1.412(7)  | C(2)-C(3)   | 1.383(7)  |
| C(2)-C(7)   | 1.460(7)  | C(3)-C(4)   | 1.395(7)  |
| C(4)-C(5)   | 1.376(7)  | C(5)-C(6)   | 1.412(7)  |
| C(6)-C(27)  | 1.474(7)  | C(8)-C(9)   | 1.407(7)  |
| C(8)-C(13)  | 1.415(7)  | C(9)-C(10)  | 1.408(7)  |
| C(9)-C(14)  | 1.486(7)  | C(10)-C(11) | 1.386(7)  |
| C(11)-C(12) | 1.383(8)  | C(12)-C(13) | 1.393(7)  |
| C(13)-C(20) | 1.495(7)  | C(14)-C(15) | 1.396(7)  |
| C(14)-C(19) | 1.400(7)  | C(15)-C(16) | 1.384(7)  |
| C(16)-C(17) | 1.371(8)  | C(17)-C(18) | 1.384(8)  |
| C(18)-C(19) | 1.392(8)  | C(20)-C(21) | 1.390(7)  |
| C(20)-C(25) | 1.403(7)  | C(21)-C(22) | 1.385(7)  |
| C(22)-C(23) | 1.386(8)  | C(23)-C(24) | 1.377(9)  |
| C(24)-C(25) | 1.389(8)  | C(28)-C(29) | 1.401(7)  |
| C(28)-C(33) | 1.408(7)  | C(29)-C(30) | 1.404(7)  |
| C(29)-C(34) | 1.498(7)  | C(30)-C(31) | 1.384(8)  |
| C(31)-C(32) | 1.381(7)  | C(32)-C(33) | 1.399(7)  |
| C(33)-C(40) | 1.496(7)  | C(34)-C(35) | 1.403(7)  |
| C(34)-C(39) | 1.396(7)  | C(35)-C(36) | 1.393(8)  |
| C(36)-C(37) | 1.376(8)  | C(37)-C(38) | 1.383(9)  |
| C(38)-C(39) | 1.395(8)  | C(40)-C(41) | 1.391(8)  |
| C(40)-C(45) | 1.400(8)  | C(41)-C(42) | 1.387(9)  |
| C(42)-C(43) | 1.373(12) | C(43)-C(44) | 1.374(12) |
| C(44)-C(45) | 1.383(9)  | C(51)-C(52) | 1.396(7)  |
| C(51)-C(56) | 1.416(6)  | C(52)-C(53) | 1.409(7)  |
| C(52)-C(57) | 1.484(7)  | C(53)-C(54) | 1.384(7)  |

|               |           |               |           |
|---------------|-----------|---------------|-----------|
| C(54)-C(55)   | 1.390(7)  | C(55)-C(56)   | 1.384(7)  |
| C(56)-C(77)   | 1.470(7)  | C(58)-C(59)   | 1.414(7)  |
| C(58)-C(63)   | 1.402(7)  | C(59)-C(60)   | 1.396(8)  |
| C(59)-C(64A)  | 1.527(16) | C(59)-C(64B)  | 1.48(3)   |
| C(60)-C(61)   | 1.373(9)  | C(61)-C(62)   | 1.395(8)  |
| C(62)-C(63)   | 1.390(7)  | C(63)-C(70)   | 1.501(7)  |
| C(64A)-C(65A) | 1.446(18) | C(64A)-C(69A) | 1.363(18) |
| C(64B)-C(65B) | 1.31(3)   | C(64B)-C(69B) | 1.40(3)   |
| C(65A)-C(66A) | 1.378(15) | C(65B)-C(66B) | 1.41(3)   |
| C(66A)-C(67A) | 1.314(17) | C(66B)-C(67B) | 1.30(3)   |
| C(67A)-C(68A) | 1.371(19) | C(67B)-C(68B) | 1.48(4)   |
| C(68A)-C(69A) | 1.385(18) | C(68B)-C(69B) | 1.41(3)   |
| C(70)-C(71)   | 1.395(8)  | C(70)-C(75)   | 1.400(8)  |
| C(71)-C(72)   | 1.394(8)  | C(72)-C(73)   | 1.376(9)  |
| C(73)-C(74)   | 1.381(9)  | C(74)-C(75)   | 1.395(8)  |
| C(78)-C(79)   | 1.404(7)  | C(78)-C(83)   | 1.405(7)  |
| C(79)-C(80)   | 1.403(7)  | C(79)-C(84)   | 1.504(7)  |
| C(80)-C(81)   | 1.384(8)  | C(81)-C(82)   | 1.382(8)  |
| C(82)-C(83)   | 1.395(7)  | C(83)-C(90)   | 1.502(7)  |
| C(84)-C(85)   | 1.389(7)  | C(84)-C(89)   | 1.387(7)  |
| C(85)-C(86)   | 1.393(8)  | C(86)-C(87)   | 1.370(9)  |
| C(87)-C(88)   | 1.394(8)  | C(88)-C(89)   | 1.386(8)  |
| C(90)-C(91)   | 1.404(7)  | C(90)-C(95)   | 1.390(7)  |
| C(91)-C(92)   | 1.377(8)  | C(92)-C(93)   | 1.390(8)  |
| C(93)-C(94)   | 1.379(8)  | C(94)-C(95)   | 1.400(8)  |
| C(26)-C(46)   | 1.390(8)  | C(26)-C(50)   | 1.415(8)  |
| C(26)-C(407)  | 1.500(8)  | C(46)-C(47)   | 1.378(9)  |
| C(47)-C(48)   | 1.403(9)  | C(48)-C(49)   | 1.372(8)  |
| C(49)-C(50)   | 1.380(8)  | C(201)-C(202) | 1.390(9)  |
| C(201)-C(206) | 1.397(9)  | C(201)-C(207) | 1.517(8)  |
| C(202)-C(203) | 1.390(8)  | C(203)-C(204) | 1.381(9)  |
| C(204)-C(205) | 1.375(10) | C(205)-C(206) | 1.371(9)  |
| C(301)-C(302) | 1.395(10) | C(301)-C(306) | 1.405(10) |
| C(301)-C(307) | 1.488(9)  | C(302)-C(303) | 1.374(9)  |
| C(303)-C(304) | 1.374(9)  | C(304)-C(305) | 1.357(9)  |
| C(305)-C(306) | 1.357(10) |               |           |

|                   |            |                   |            |
|-------------------|------------|-------------------|------------|
| O(1)-Bi(1)-Bi(2)  | 39.67(9)   | O(1)-Bi(1)-O(2)   | 79.70(13)  |
| O(1)-Bi(1)-N(1)   | 73.95(12)  | O(1)-Bi(1)-C(1)   | 97.84(15)  |
| O(2)-Bi(1)-Bi(2)  | 40.45(9)   | O(2)-Bi(1)-N(1)   | 147.42(13) |
| O(2)-Bi(1)-C(1)   | 94.87(15)  | N(1)-Bi(1)-Bi(2)  | 112.75(9)  |
| C(1)-Bi(1)-Bi(2)  | 102.83(11) | C(1)-Bi(1)-N(1)   | 70.55(14)  |
| O(1)-Bi(2)-Bi(1)  | 39.65(9)   | O(1)-Bi(2)-O(2)   | 79.48(13)  |
| O(1)-Bi(2)-N(4)   | 76.11(12)  | O(1)-Bi(2)-C(51)  | 93.95(15)  |
| O(2)-Bi(2)-Bi(1)  | 40.26(9)   | O(2)-Bi(2)-N(4)   | 150.24(13) |
| O(2)-Bi(2)-C(51)  | 94.38(15)  | N(4)-Bi(2)-Bi(1)  | 112.33(9)  |
| C(51)-Bi(2)-Bi(1) | 90.90(12)  | C(51)-Bi(2)-N(4)  | 70.79(15)  |
| Bi(1)-O(1)-Bi(2)  | 100.68(13) | Bi(1)-O(2)-Bi(2)  | 99.29(13)  |
| C(7)-N(1)-Bi(1)   | 108.7(3)   | C(7)-N(1)-C(8)    | 119.4(4)   |
| C(8)-N(1)-Bi(1)   | 131.4(3)   | C(27)-N(2)-C(28)  | 119.6(4)   |
| C(57)-N(3)-C(58)  | 119.1(4)   | C(77)-N(4)-Bi(2)  | 109.5(3)   |
| C(77)-N(4)-C(78)  | 120.2(4)   | C(78)-N(4)-Bi(2)  | 129.7(3)   |
| C(2)-C(1)-Bi(1)   | 116.7(3)   | C(6)-C(1)-Bi(1)   | 126.2(3)   |
| C(6)-C(1)-C(2)    | 117.1(4)   | C(1)-C(2)-C(7)    | 121.4(4)   |
| C(3)-C(2)-C(1)    | 121.6(4)   | C(3)-C(2)-C(7)    | 117.0(4)   |
| C(2)-C(3)-C(4)    | 120.6(5)   | C(5)-C(4)-C(3)    | 119.3(5)   |
| C(4)-C(5)-C(6)    | 120.9(5)   | C(1)-C(6)-C(27)   | 122.1(4)   |
| C(5)-C(6)-C(1)    | 120.5(4)   | C(5)-C(6)-C(27)   | 117.4(4)   |
| N(1)-C(7)-C(2)    | 122.6(4)   | C(9)-C(8)-N(1)    | 118.0(4)   |
| C(9)-C(8)-C(13)   | 120.5(4)   | C(13)-C(8)-N(1)   | 121.5(4)   |
| C(8)-C(9)-C(10)   | 119.2(4)   | C(8)-C(9)-C(14)   | 122.4(4)   |
| C(10)-C(9)-C(14)  | 118.4(5)   | C(11)-C(10)-C(9)  | 120.3(5)   |
| C(12)-C(11)-C(10) | 119.8(5)   | C(11)-C(12)-C(13) | 122.0(5)   |
| C(8)-C(13)-C(20)  | 123.8(4)   | C(12)-C(13)-C(8)  | 118.1(5)   |
| C(12)-C(13)-C(20) | 118.0(5)   | C(15)-C(14)-C(9)  | 122.3(5)   |
| C(15)-C(14)-C(19) | 118.4(5)   | C(19)-C(14)-C(9)  | 119.1(5)   |
| C(16)-C(15)-C(14) | 120.8(5)   | C(17)-C(16)-C(15) | 120.5(5)   |
| C(16)-C(17)-C(18) | 119.8(5)   | C(17)-C(18)-C(19) | 120.5(5)   |
| C(18)-C(19)-C(14) | 120.0(5)   | C(21)-C(20)-C(13) | 121.9(5)   |
| C(21)-C(20)-C(25) | 119.0(5)   | C(25)-C(20)-C(13) | 119.2(5)   |
| C(22)-C(21)-C(20) | 120.6(5)   | C(21)-C(22)-C(23) | 120.0(5)   |
| C(24)-C(23)-C(22) | 120.1(5)   | C(23)-C(24)-C(25) | 120.4(5)   |
| C(24)-C(25)-C(20) | 119.9(5)   | N(2)-C(27)-C(6)   | 120.1(5)   |
| C(29)-C(28)-N(2)  | 118.9(5)   | C(29)-C(28)-C(33) | 119.9(4)   |
| C(33)-C(28)-N(2)  | 121.0(4)   | C(28)-C(29)-C(30) | 119.5(5)   |



|                      |           |                      |           |
|----------------------|-----------|----------------------|-----------|
| C(28)-C(29)-C(34)    | 123.1(4)  | C(30)-C(29)-C(34)    | 117.4(5)  |
| C(31)-C(30)-C(29)    | 120.6(5)  | C(32)-C(31)-C(30)    | 119.7(5)  |
| C(31)-C(32)-C(33)    | 121.3(5)  | C(28)-C(33)-C(40)    | 123.4(4)  |
| C(32)-C(33)-C(28)    | 118.9(5)  | C(32)-C(33)-C(40)    | 117.6(5)  |
| C(35)-C(34)-C(29)    | 122.2(5)  | C(39)-C(34)-C(29)    | 119.4(5)  |
| C(39)-C(34)-C(35)    | 118.4(5)  | C(36)-C(35)-C(34)    | 119.9(5)  |
| C(37)-C(36)-C(35)    | 121.3(5)  | C(36)-C(37)-C(38)    | 119.4(5)  |
| C(37)-C(38)-C(39)    | 120.3(5)  | C(38)-C(39)-C(34)    | 120.8(5)  |
| C(41)-C(40)-C(33)    | 118.8(5)  | C(41)-C(40)-C(45)    | 119.0(5)  |
| C(45)-C(40)-C(33)    | 122.1(5)  | C(42)-C(41)-C(40)    | 120.4(6)  |
| C(43)-C(42)-C(41)    | 119.9(7)  | C(42)-C(43)-C(44)    | 120.3(6)  |
| C(43)-C(44)-C(45)    | 120.7(7)  | C(44)-C(45)-C(40)    | 119.6(7)  |
| C(52)-C(51)-Bi(2)    | 126.9(3)  | C(52)-C(51)-C(56)    | 116.7(4)  |
| C(56)-C(51)-Bi(2)    | 116.4(3)  | C(51)-C(52)-C(53)    | 120.9(5)  |
| C(51)-C(52)-C(57)    | 122.0(4)  | C(53)-C(52)-C(57)    | 117.1(4)  |
| C(54)-C(53)-C(52)    | 120.8(5)  | C(53)-C(54)-C(55)    | 119.2(5)  |
| C(56)-C(55)-C(54)    | 120.1(5)  | C(51)-C(56)-C(77)    | 121.0(4)  |
| C(55)-C(56)-C(51)    | 122.1(5)  | C(55)-C(56)-C(77)    | 116.9(4)  |
| N(3)-C(57)-C(52)     | 118.6(4)  | C(59)-C(58)-N(3)     | 115.8(5)  |
| C(63)-C(58)-N(3)     | 124.3(5)  | C(63)-C(58)-C(59)    | 119.9(5)  |
| C(58)-C(59)-C(64A)   | 118.3(6)  | C(58)-C(59)-C(64B)   | 125.3(11) |
| C(60)-C(59)-C(58)    | 118.8(5)  | C(60)-C(59)-C(64A)   | 122.9(7)  |
| C(60)-C(59)-C(64B)   | 115.0(11) | C(61)-C(60)-C(59)    | 121.3(5)  |
| C(60)-C(61)-C(62)    | 119.9(5)  | C(63)-C(62)-C(61)    | 120.5(5)  |
| C(58)-C(63)-C(70)    | 121.3(4)  | C(62)-C(63)-C(58)    | 119.6(5)  |
| C(62)-C(63)-C(70)    | 119.0(5)  | C(65A)-C(64A)-C(59)  | 121.1(10) |
| C(69A)-C(64A)-C(59)  | 123.2(12) | C(69A)-C(64A)-C(65A) | 115.6(13) |
| C(65B)-C(64B)-C(59)  | 123(2)    | C(65B)-C(64B)-C(69B) | 122(2)    |
| C(69B)-C(64B)-C(59)  | 114.6(18) | C(66A)-C(65A)-C(64A) | 121.7(11) |
| C(64B)-C(65B)-C(66B) | 122(2)    | C(67A)-C(66A)-C(65A) | 119.0(12) |
| C(67B)-C(66B)-C(65B) | 119(2)    | C(66A)-C(67A)-C(68A) | 122.1(13) |
| C(66B)-C(67B)-C(68B) | 123(3)    | C(67A)-C(68A)-C(69A) | 119.8(12) |
| C(69B)-C(68B)-C(67B) | 115(2)    | C(64A)-C(69A)-C(68A) | 121.4(13) |
| C(64B)-C(69B)-C(68B) | 119(2)    | C(71)-C(70)-C(63)    | 119.8(5)  |
| C(71)-C(70)-C(75)    | 118.7(5)  | C(75)-C(70)-C(63)    | 121.4(5)  |
| C(72)-C(71)-C(70)    | 120.4(5)  | C(73)-C(72)-C(71)    | 120.6(6)  |
| C(72)-C(73)-C(74)    | 119.5(6)  | C(73)-C(74)-C(75)    | 120.8(6)  |
| C(74)-C(75)-C(70)    | 119.9(6)  | N(4)-C(77)-C(56)     | 122.1(4)  |

|                      |          |                      |          |
|----------------------|----------|----------------------|----------|
| C(79)-C(78)-N(4)     | 118.1(4) | C(79)-C(78)-C(83)    | 120.5(5) |
| C(83)-C(78)-N(4)     | 121.1(4) | C(78)-C(79)-C(84)    | 122.4(4) |
| C(80)-C(79)-C(78)    | 118.8(5) | C(80)-C(79)-C(84)    | 118.7(5) |
| C(81)-C(80)-C(79)    | 120.6(5) | C(82)-C(81)-C(80)    | 120.3(5) |
| C(81)-C(82)-C(83)    | 120.7(5) | C(78)-C(83)-C(90)    | 122.2(4) |
| C(82)-C(83)-C(78)    | 119.0(5) | C(82)-C(83)-C(90)    | 118.8(5) |
| C(85)-C(84)-C(79)    | 120.4(5) | C(89)-C(84)-C(79)    | 120.3(5) |
| C(89)-C(84)-C(85)    | 119.3(5) | C(84)-C(85)-C(86)    | 119.9(5) |
| C(87)-C(86)-C(85)    | 120.7(5) | C(86)-C(87)-C(88)    | 119.6(5) |
| C(89)-C(88)-C(87)    | 119.9(5) | C(88)-C(89)-C(84)    | 120.5(5) |
| C(91)-C(90)-C(83)    | 119.6(5) | C(95)-C(90)-C(83)    | 121.6(5) |
| C(95)-C(90)-C(91)    | 118.8(5) | C(92)-C(91)-C(90)    | 121.2(5) |
| C(91)-C(92)-C(93)    | 119.6(5) | C(94)-C(93)-C(92)    | 120.3(5) |
| C(93)-C(94)-C(95)    | 120.3(5) | C(90)-C(95)-C(94)    | 120.0(5) |
| C(46)-C(26)-C(50)    | 117.8(5) | C(46)-C(26)-C(407)   | 121.1(5) |
| C(50)-C(26)-C(407)   | 121.0(5) | C(47)-C(46)-C(26)    | 121.0(6) |
| C(46)-C(47)-C(48)    | 120.7(6) | C(49)-C(48)-C(47)    | 118.6(6) |
| C(48)-C(49)-C(50)    | 121.4(5) | C(49)-C(50)-C(26)    | 120.4(5) |
| C(202)-C(201)-C(206) | 117.7(6) | C(202)-C(201)-C(207) | 120.0(6) |
| C(206)-C(201)-C(207) | 122.3(6) | C(201)-C(202)-C(203) | 120.5(6) |
| C(204)-C(203)-C(202) | 121.0(6) | C(205)-C(204)-C(203) | 118.4(6) |
| C(206)-C(205)-C(204) | 121.4(6) | C(205)-C(206)-C(201) | 121.1(6) |
| C(302)-C(301)-C(306) | 116.4(6) | C(302)-C(301)-C(307) | 122.2(7) |
| C(306)-C(301)-C(307) | 121.4(7) | C(303)-C(302)-C(301) | 121.0(6) |
| C(302)-C(303)-C(304) | 120.7(6) | C(305)-C(304)-C(303) | 119.1(6) |
| C(306)-C(305)-C(304) | 121.2(6) | C(305)-C(306)-C(301) | 121.5(6) |

---

## 8.6. Single Crystal Structure Analysis of **7**

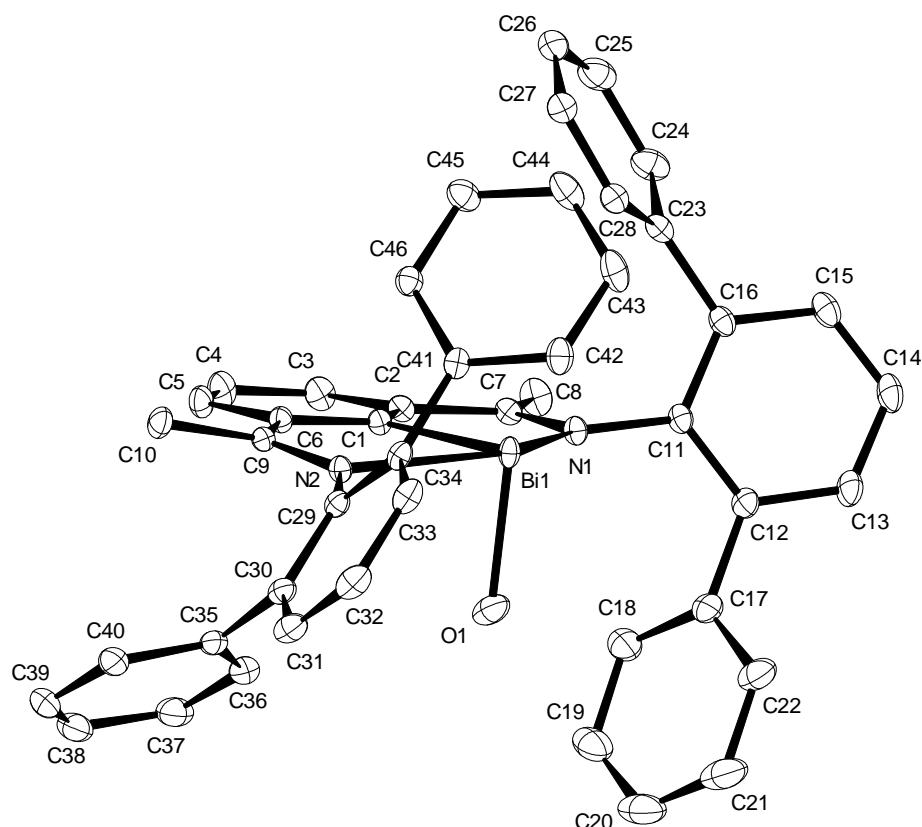

**Figure S6.** The molecular structure of complex **7**. H atoms have been removed for clarity.

**X-ray Crystal Structure Analysis of complex 7:**  $C_{46}H_{35}BiN_2O$ ,  $M_r = 840.74 \text{ g mol}^{-1}$ , orange prism, crystal size  $0.134 \times 0.047 \times 0.021 \text{ mm}^3$ , triclinic,  $P1$  [2],  $a = 11.9494(7) \text{ \AA}$ ,  $b = 12.1997(7) \text{ \AA}$ ,  $c = 14.6767(8) \text{ \AA}$ ,  $\alpha = 101.774(2)^\circ$ ,  $\beta = 94.585(2)^\circ$ ,  $\gamma = 113.825(2)^\circ$ ,  $V = 1884.29(19) \text{ \AA}^3$ ,  $T = 100(2) \text{ K}$ ,  $Z = 2$ ,  $D_{calc} = 1.482 \text{ g cm}^{-3}$ ,  $\lambda = 0.71073 \text{ \AA}$ ,  $\mu(Mo-K\alpha) = 4.715 \text{ mm}^{-1}$ , analytical absorption correction ( $T_{min} = 0.64576$ ,  $T_{max} = 0.91743$ ), Bruker-AXS Kappa Mach3 with APEX-II detector and  $\text{I}\mu\text{S}$  micro focus source,  $1.889 < \theta < 36.318^\circ$ , 147263 measured reflections, 18168 independent reflections, 17403 reflections with  $I > 2\sigma(I)$ ,  $R_{int} = 0.0248$ . The structure was solved by *SHELXT* and refined by full-matrix least-squares (*SHELXL*) against  $F^2$  to  $R_1 = 0.0180$  [ $I > 2\sigma(I)$ ],  $wR_2 = 0.0431$ , 475 parameters.

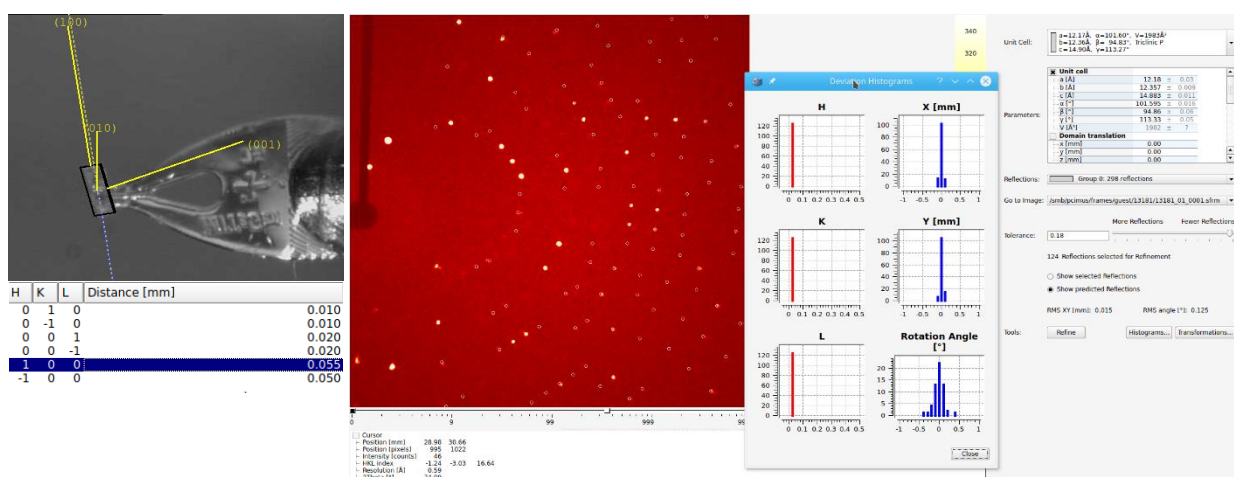

## INTENSITY STATISTICS FOR DATASET

| Resolution  | #Data | #Theory | %Complete | Redundancy | Mean I | Mean I/s | Rmerge | Rsigma |
|-------------|-------|---------|-----------|------------|--------|----------|--------|--------|
| Inf - 2.41  | 275   | 275     | 100.0     | 12.79      | 148.61 | 131.83   | 0.0201 | 0.0068 |
| 2.41 - 1.63 | 639   | 639     | 100.0     | 14.56      | 98.94  | 131.99   | 0.0188 | 0.0066 |
| 1.63 - 1.29 | 926   | 926     | 100.0     | 14.49      | 65.94  | 119.52   | 0.0191 | 0.0071 |
| 1.29 - 1.13 | 890   | 890     | 100.0     | 14.00      | 52.74  | 106.31   | 0.0204 | 0.0077 |
| 1.13 - 1.02 | 992   | 992     | 100.0     | 11.60      | 43.60  | 92.22    | 0.0226 | 0.0091 |
| 1.02 - 0.95 | 880   | 880     | 100.0     | 9.75       | 35.44  | 77.54    | 0.0237 | 0.0106 |
| 0.95 - 0.89 | 989   | 989     | 100.0     | 8.55       | 31.14  | 69.63    | 0.0254 | 0.0121 |
| 0.89 - 0.85 | 832   | 832     | 100.0     | 8.00       | 25.98  | 61.24    | 0.0270 | 0.0135 |
| 0.85 - 0.81 | 998   | 998     | 100.0     | 7.65       | 23.03  | 55.51    | 0.0286 | 0.0150 |
| 0.81 - 0.78 | 896   | 896     | 100.0     | 7.32       | 21.24  | 51.75    | 0.0302 | 0.0164 |
| 0.78 - 0.75 | 1034  | 1034    | 100.0     | 6.98       | 18.88  | 45.19    | 0.0327 | 0.0185 |
| 0.75 - 0.73 | 788   | 788     | 100.0     | 6.77       | 18.09  | 43.15    | 0.0348 | 0.0199 |
| 0.73 - 0.71 | 884   | 884     | 100.0     | 6.54       | 16.64  | 39.22    | 0.0372 | 0.0218 |
| 0.71 - 0.69 | 998   | 999     | 99.9      | 6.30       | 14.16  | 34.72    | 0.0418 | 0.0249 |
| 0.69 - 0.67 | 1103  | 1103    | 100.0     | 6.12       | 13.69  | 32.28    | 0.0433 | 0.0267 |
| 0.67 - 0.66 | 599   | 602     | 99.5      | 5.89       | 13.19  | 31.18    | 0.0461 | 0.0284 |
| 0.66 - 0.64 | 1331  | 1337    | 99.6      | 5.75       | 11.36  | 27.34    | 0.0511 | 0.0324 |
| 0.64 - 0.63 | 679   | 689     | 98.5      | 5.46       | 10.74  | 25.61    | 0.0544 | 0.0348 |
| 0.63 - 0.62 | 820   | 830     | 98.8      | 5.37       | 10.01  | 23.17    | 0.0548 | 0.0376 |
| 0.62 - 0.61 | 781   | 794     | 98.4      | 5.27       | 10.10  | 23.32    | 0.0600 | 0.0383 |
| 0.61 - 0.60 | 863   | 888     | 97.2      | 5.02       | 8.72   | 20.32    | 0.0673 | 0.0441 |
| 0.70 - 0.60 | 6708  | 6776    | 99.0      | 5.63       | 11.40  | 26.97    | 0.0510 | 0.0327 |
| Inf - 0.60  | 18197 | 18265   | 99.6      | 8.08       | 28.17  | 56.06    | 0.0248 | 0.0140 |

Several low angle reflections were shadowed by the beam stop and removed from the data before the final refinement cycles. The H atom of the -OH group appeared as a residual electron density peak and refined satisfactorily in this position. There are no suitable acceptors around this H atom, though we note that there is a possible interaction of the (O)-H atom with the neighbouring phenyl group: O1---centroid(C17-C22) = 3.35 Å; O-H---centroid(C17-C22) = 159°.

The structure contains a disordered *n*-hexane molecule which could not be described in satisfactory way. To improve signal-to-noise ratio quality the SQUEEZE routine in PLATON was applied to the dataset and led to solvent accessible void of 211.03 Å<sup>3</sup> (11.2% of unit cell volume) using a 1.2 Å probe radius and a grid size of 0.7 Å (CCDC Mercury).

Complete .cif-data of the compound are available under the CCDC number **CCDC-2031450**.

**Table S13. Crystal data and structure refinement.**

|                                                     |                                                                               |                                                                             |
|-----------------------------------------------------|-------------------------------------------------------------------------------|-----------------------------------------------------------------------------|
| Identification code                                 | 13181                                                                         |                                                                             |
| Empirical formula                                   | C <sub>46</sub> H <sub>35</sub> Bi N <sub>2</sub> O                           |                                                                             |
| Color                                               | orange                                                                        |                                                                             |
| Formula weight                                      | 840.74 g·mol <sup>-1</sup>                                                    |                                                                             |
| Temperature                                         | 100(2) K                                                                      |                                                                             |
| Wavelength                                          | 0.71073 Å                                                                     |                                                                             |
| Crystal system                                      | Triclinic                                                                     |                                                                             |
| Space group                                         | <i>P</i> $\bar{1}$ , (no. 2)                                                  |                                                                             |
| Unit cell dimensions                                | <i>a</i> = 11.9494(7) Å<br><i>b</i> = 12.1997(7) Å<br><i>c</i> = 14.6767(8) Å | $\alpha$ = 101.774(2)°.<br>$\beta$ = 94.585(2)°.<br>$\gamma$ = 113.825(2)°. |
| Volume                                              | 1884.29(19) Å <sup>3</sup>                                                    |                                                                             |
| Z                                                   | 2                                                                             |                                                                             |
| Density (calculated)                                | 1.482 Mg·m <sup>-3</sup>                                                      |                                                                             |
| Absorption coefficient                              | 4.715 mm <sup>-1</sup>                                                        |                                                                             |
| F(000)                                              | 832 e                                                                         |                                                                             |
| Crystal size                                        | 0.134 x 0.047 x 0.021 mm <sup>3</sup>                                         |                                                                             |
| $\theta$ range for data collection                  | 1.889 to 36.318°.                                                             |                                                                             |
| Index ranges                                        | -19 ≤ <i>h</i> ≤ 19, -20 ≤ <i>k</i> ≤ 20, -24 ≤ <i>l</i> ≤ 24                 |                                                                             |
| Reflections collected                               | 147263                                                                        |                                                                             |
| Independent reflections                             | 18168 [ <i>R</i> <sub>int</sub> = 0.0248]                                     |                                                                             |
| Reflections with <i>I</i> > 2σ( <i>I</i> )          | 17403                                                                         |                                                                             |
| Completeness to $\theta = 25.242^\circ$             | 99.6 %                                                                        |                                                                             |
| Absorption correction                               | Gaussian                                                                      |                                                                             |
| Max. and min. transmission                          | 0.91743 and 0.64576                                                           |                                                                             |
| Refinement method                                   | Full-matrix least-squares on <i>F</i> <sup>2</sup>                            |                                                                             |
| Data / restraints / parameters                      | 18168 / 0 / 475                                                               |                                                                             |
| Goodness-of-fit on <i>F</i> <sup>2</sup>            | 1.102                                                                         |                                                                             |
| Final <i>R</i> indices [ <i>I</i> > 2σ( <i>I</i> )] | <i>R</i> <sub>1</sub> = 0.0180                                                | <i>wR</i> <sup>2</sup> = 0.0431                                             |
| <i>R</i> indices (all data)                         | <i>R</i> <sub>1</sub> = 0.0193                                                | <i>wR</i> <sup>2</sup> = 0.0435                                             |
| Extinction coefficient                              | n/a                                                                           |                                                                             |
| Largest diff. peak and hole                         | 3.472 and -1.491 e·Å <sup>-3</sup>                                            |                                                                             |

**Table S14. Bond lengths [Å] and angles [°].**

|              |            |              |            |
|--------------|------------|--------------|------------|
| Bi(1)-O(1)   | 2.0984(10) | Bi(1)-N(1)   | 2.2319(9)  |
| Bi(1)-N(2)   | 2.6117(9)  | Bi(1)-C(1)   | 2.1869(11) |
| O(1)-H(1)    | 0.77(3)    | N(1)-C(11)   | 1.4170(15) |
| N(1)-C(7)    | 1.3832(15) | N(2)-C(29)   | 1.4158(14) |
| N(2)-C(9)    | 1.2848(14) | C(1)-C(2)    | 1.3902(15) |
| C(1)-C(6)    | 1.3969(15) | C(29)-C(34)  | 1.4051(17) |
| C(29)-C(30)  | 1.4107(16) | C(11)-C(12)  | 1.4107(16) |
| C(11)-C(16)  | 1.4109(17) | C(8)-C(7)    | 1.3552(16) |
| C(8)-H(8A)   | 0.90(2)    | C(8)-H(8B)   | 0.91(2)    |
| C(35)-C(36)  | 1.3981(18) | C(35)-C(30)  | 1.4829(18) |
| C(35)-C(40)  | 1.4007(18) | C(2)-C(3)    | 1.4026(16) |
| C(2)-C(7)    | 1.4891(16) | C(23)-C(28)  | 1.3959(18) |
| C(23)-C(16)  | 1.4875(17) | C(23)-C(24)  | 1.3970(18) |
| C(46)-H(46)  | 0.9500     | C(46)-C(45)  | 1.3872(18) |
| C(46)-C(41)  | 1.4006(16) | C(5)-H(5)    | 0.9500     |
| C(5)-C(4)    | 1.3926(18) | C(5)-C(6)    | 1.3934(16) |
| C(15)-H(15)  | 0.9500     | C(15)-C(16)  | 1.3981(17) |
| C(15)-C(14)  | 1.387(2)   | C(4)-H(4)    | 0.9500     |
| C(4)-C(3)    | 1.3878(18) | C(9)-C(6)    | 1.4826(16) |
| C(9)-C(10)   | 1.4969(16) | C(36)-H(36)  | 0.9500     |
| C(36)-C(37)  | 1.394(2)   | C(12)-C(13)  | 1.4016(17) |
| C(12)-C(17)  | 1.4862(18) | C(33)-H(33)  | 0.9500     |
| C(33)-C(34)  | 1.3987(16) | C(33)-C(32)  | 1.387(2)   |
| C(28)-H(28)  | 0.9500     | C(28)-C(27)  | 1.3903(18) |
| C(10)-H(10A) | 0.96(2)    | C(10)-H(10B) | 0.94(2)    |
| C(10)-H(10C) | 0.90(2)    | C(34)-C(41)  | 1.4805(17) |
| C(13)-H(13)  | 0.9500     | C(13)-C(14)  | 1.385(2)   |
| C(30)-C(31)  | 1.3978(17) | C(45)-H(45)  | 0.9500     |
| C(45)-C(44)  | 1.390(2)   | C(3)-H(3)    | 0.9500     |
| C(32)-H(32)  | 0.9500     | C(32)-C(31)  | 1.387(2)   |
| C(41)-C(42)  | 1.3969(17) | C(14)-H(14)  | 0.9500     |
| C(40)-H(40)  | 0.9500     | C(40)-C(39)  | 1.388(2)   |
| C(42)-H(42)  | 0.9500     | C(42)-C(43)  | 1.391(2)   |
| C(25)-H(25)  | 0.9500     | C(25)-C(24)  | 1.393(2)   |
| C(25)-C(26)  | 1.380(2)   | C(18)-H(18)  | 0.9500     |
| C(18)-C(17)  | 1.398(2)   | C(18)-C(19)  | 1.393(2)   |

|                   |            |                   |            |
|-------------------|------------|-------------------|------------|
| C(17)-C(22)       | 1.398(2)   | C(39)-H(39)       | 0.9500     |
| C(39)-C(38)       | 1.383(3)   | C(24)-H(24)       | 0.9500     |
| C(22)-H(22)       | 0.9500     | C(22)-C(21)       | 1.395(2)   |
| C(37)-H(37)       | 0.9500     | C(37)-C(38)       | 1.388(2)   |
| C(38)-H(38)       | 0.9500     | C(44)-H(44)       | 0.9500     |
| C(44)-C(43)       | 1.384(2)   | C(27)-H(27)       | 0.9500     |
| C(27)-C(26)       | 1.386(2)   | C(31)-H(31)       | 0.9500     |
| C(43)-H(43)       | 0.9500     | C(26)-H(26)       | 0.9500     |
| C(19)-H(19)       | 0.9500     | C(19)-C(20)       | 1.385(3)   |
| C(20)-H(20)       | 0.9500     | C(20)-C(21)       | 1.377(3)   |
| C(21)-H(21)       | 0.9500     |                   |            |
| O(1)-Bi(1)-N(1)   | 98.95(4)   | O(1)-Bi(1)-N(2)   | 79.95(4)   |
| O(1)-Bi(1)-C(1)   | 94.68(4)   | N(1)-Bi(1)-N(2)   | 143.98(3)  |
| C(1)-Bi(1)-N(1)   | 75.49(4)   | C(1)-Bi(1)-N(2)   | 68.78(3)   |
| Bi(1)-O(1)-H(1)   | 108(2)     | C(11)-N(1)-Bi(1)  | 123.03(7)  |
| C(7)-N(1)-Bi(1)   | 116.90(7)  | C(7)-N(1)-C(11)   | 119.18(9)  |
| C(29)-N(2)-Bi(1)  | 122.21(7)  | C(9)-N(2)-Bi(1)   | 112.90(7)  |
| C(9)-N(2)-C(29)   | 124.81(9)  | C(2)-C(1)-Bi(1)   | 115.54(8)  |
| C(2)-C(1)-C(6)    | 122.33(10) | C(6)-C(1)-Bi(1)   | 122.09(8)  |
| C(34)-C(29)-N(2)  | 117.84(10) | C(34)-C(29)-C(30) | 120.82(10) |
| C(30)-C(29)-N(2)  | 120.90(10) | C(12)-C(11)-N(1)  | 120.52(10) |
| C(12)-C(11)-C(16) | 119.22(10) | C(16)-C(11)-N(1)  | 120.20(10) |
| C(7)-C(8)-H(8A)   | 120.1(14)  | C(7)-C(8)-H(8B)   | 120.4(14)  |
| H(8A)-C(8)-H(8B)  | 119.5(19)  | C(36)-C(35)-C(30) | 122.42(11) |
| C(36)-C(35)-C(40) | 118.86(13) | C(40)-C(35)-C(30) | 118.69(12) |
| C(1)-C(2)-C(3)    | 117.85(10) | C(1)-C(2)-C(7)    | 118.35(10) |
| C(3)-C(2)-C(7)    | 123.79(10) | C(28)-C(23)-C(16) | 120.80(11) |
| C(28)-C(23)-C(24) | 118.56(12) | C(24)-C(23)-C(16) | 120.48(11) |
| C(45)-C(46)-H(46) | 119.7      | C(45)-C(46)-C(41) | 120.61(11) |
| C(41)-C(46)-H(46) | 119.7      | C(4)-C(5)-H(5)    | 120.4      |
| C(4)-C(5)-C(6)    | 119.18(11) | C(6)-C(5)-H(5)    | 120.4      |
| C(16)-C(15)-H(15) | 119.6      | C(14)-C(15)-H(15) | 119.6      |
| C(14)-C(15)-C(16) | 120.75(12) | C(5)-C(4)-H(4)    | 119.3      |
| C(3)-C(4)-C(5)    | 121.30(11) | C(3)-C(4)-H(4)    | 119.3      |
| N(2)-C(9)-C(6)    | 115.97(9)  | N(2)-C(9)-C(10)   | 124.80(10) |
| C(6)-C(9)-C(10)   | 119.23(10) | C(35)-C(36)-H(36) | 120.0      |
| C(37)-C(36)-C(35) | 119.98(12) | C(37)-C(36)-H(36) | 120.0      |



|                     |            |                     |            |
|---------------------|------------|---------------------|------------|
| C(11)-C(12)-C(17)   | 122.51(11) | C(13)-C(12)-C(11)   | 119.26(11) |
| C(13)-C(12)-C(17)   | 118.23(11) | C(1)-C(6)-C(9)      | 119.20(9)  |
| C(5)-C(6)-C(1)      | 119.06(10) | C(5)-C(6)-C(9)      | 121.72(10) |
| C(34)-C(33)-H(33)   | 119.5      | C(32)-C(33)-H(33)   | 119.5      |
| C(32)-C(33)-C(34)   | 120.92(12) | C(23)-C(28)-H(28)   | 119.7      |
| C(27)-C(28)-C(23)   | 120.61(12) | C(27)-C(28)-H(28)   | 119.7      |
| C(9)-C(10)-H(10A)   | 109.5(13)  | C(9)-C(10)-H(10B)   | 109.0(14)  |
| C(9)-C(10)-H(10C)   | 112.7(15)  | H(10A)-C(10)-H(10B) | 107.3(19)  |
| H(10A)-C(10)-H(10C) | 110(2)     | H(10B)-C(10)-H(10C) | 108(2)     |
| C(29)-C(34)-C(41)   | 121.05(10) | C(33)-C(34)-C(29)   | 118.82(11) |
| C(33)-C(34)-C(41)   | 120.13(11) | C(11)-C(16)-C(23)   | 122.18(10) |
| C(15)-C(16)-C(11)   | 119.90(11) | C(15)-C(16)-C(23)   | 117.88(11) |
| C(12)-C(13)-H(13)   | 119.4      | C(14)-C(13)-C(12)   | 121.29(12) |
| C(14)-C(13)-H(13)   | 119.4      | C(29)-C(30)-C(35)   | 122.26(10) |
| C(31)-C(30)-C(29)   | 118.36(12) | C(31)-C(30)-C(35)   | 119.36(11) |
| C(46)-C(45)-H(45)   | 119.9      | C(46)-C(45)-C(44)   | 120.24(12) |
| C(44)-C(45)-H(45)   | 119.9      | C(2)-C(3)-H(3)      | 119.9      |
| C(4)-C(3)-C(2)      | 120.23(11) | C(4)-C(3)-H(3)      | 119.9      |
| C(33)-C(32)-H(32)   | 120.1      | C(31)-C(32)-C(33)   | 119.76(11) |
| C(31)-C(32)-H(32)   | 120.1      | C(46)-C(41)-C(34)   | 121.24(10) |
| C(42)-C(41)-C(46)   | 118.33(11) | C(42)-C(41)-C(34)   | 120.43(11) |
| C(15)-C(14)-H(14)   | 120.2      | C(13)-C(14)-C(15)   | 119.53(11) |
| C(13)-C(14)-H(14)   | 120.2      | C(35)-C(40)-H(40)   | 119.8      |
| C(39)-C(40)-C(35)   | 120.49(14) | C(39)-C(40)-H(40)   | 119.8      |
| N(1)-C(7)-C(2)      | 113.67(9)  | C(8)-C(7)-N(1)      | 124.50(11) |
| C(8)-C(7)-C(2)      | 121.83(11) | C(41)-C(42)-H(42)   | 119.5      |
| C(43)-C(42)-C(41)   | 121.01(12) | C(43)-C(42)-H(42)   | 119.5      |
| C(24)-C(25)-H(25)   | 119.9      | C(26)-C(25)-H(25)   | 119.9      |
| C(26)-C(25)-C(24)   | 120.20(13) | C(17)-C(18)-H(18)   | 119.8      |
| C(19)-C(18)-H(18)   | 119.8      | C(19)-C(18)-C(17)   | 120.41(15) |
| C(18)-C(17)-C(12)   | 121.93(12) | C(22)-C(17)-C(12)   | 119.77(13) |
| C(22)-C(17)-C(18)   | 118.28(13) | C(40)-C(39)-H(39)   | 119.8      |
| C(38)-C(39)-C(40)   | 120.43(13) | C(38)-C(39)-H(39)   | 119.8      |
| C(23)-C(24)-H(24)   | 119.7      | C(25)-C(24)-C(23)   | 120.54(13) |
| C(25)-C(24)-H(24)   | 119.7      | C(17)-C(22)-H(22)   | 119.7      |
| C(21)-C(22)-C(17)   | 120.56(16) | C(21)-C(22)-H(22)   | 119.7      |
| C(36)-C(37)-H(37)   | 119.7      | C(38)-C(37)-C(36)   | 120.59(14) |
| C(38)-C(37)-H(37)   | 119.7      | C(39)-C(38)-C(37)   | 119.58(14) |

|                   |            |                   |            |
|-------------------|------------|-------------------|------------|
| C(39)-C(38)-H(38) | 120.2      | C(37)-C(38)-H(38) | 120.2      |
| C(45)-C(44)-H(44) | 120.1      | C(43)-C(44)-C(45) | 119.86(13) |
| C(43)-C(44)-H(44) | 120.1      | C(28)-C(27)-H(27) | 119.9      |
| C(26)-C(27)-C(28) | 120.15(13) | C(26)-C(27)-H(27) | 119.9      |
| C(30)-C(31)-H(31) | 119.4      | C(32)-C(31)-C(30) | 121.29(12) |
| C(32)-C(31)-H(31) | 119.4      | C(42)-C(43)-H(43) | 120.0      |
| C(44)-C(43)-C(42) | 119.91(12) | C(44)-C(43)-H(43) | 120.0      |
| C(25)-C(26)-C(27) | 119.93(13) | C(25)-C(26)-H(26) | 120.0      |
| C(27)-C(26)-H(26) | 120.0      | C(18)-C(19)-H(19) | 119.6      |
| C(20)-C(19)-C(18) | 120.81(17) | C(20)-C(19)-H(19) | 119.6      |
| C(19)-C(20)-H(20) | 120.4      | C(21)-C(20)-C(19) | 119.18(15) |
| C(21)-C(20)-H(20) | 120.4      | C(22)-C(21)-H(21) | 119.6      |
| C(20)-C(21)-C(22) | 120.75(17) | C(20)-C(21)-H(21) | 119.6      |

---

## 9. GC Analysis of N<sub>2</sub> Formation

Although N<sub>2</sub>O provided by Air Liquide contains less than 1 ppm air and O<sub>2</sub>, qualitative GC-TCD analysis of the headspace after the catalytic reactions was performed to provide additional proofs of the activation of N<sub>2</sub>O.

The samples were measured on an Agilent Technologies GC 7890B.

The parameters:

Column: 30 m HP-Plot 5 Å Molsieve, inner diameter: 0,32 mm, film thickness: 10 µm

Temperature: injector: 220°C (split injection, Split 40:1), detector: 250°C (TCD)

Program: 30°C, 10 min isotherm 6°C/min 250°C, 12°C/min 320 °C, 5 min isotherm

Gas: 0.5 bar helium

The spectrum of 1:1 mixture of N<sub>2</sub>O and N<sub>2</sub>:

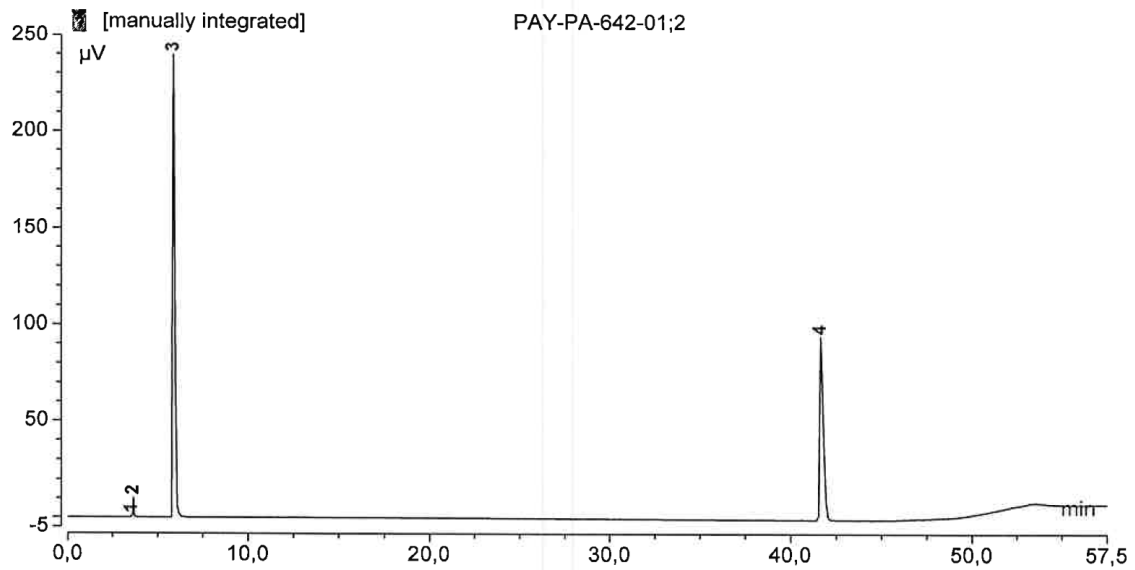

Sample: **PAY-PA-642-01;2**  
 Sequenz: **7477 PAY-PA VD**  
 Sequenz date: **30.06.20**

Instrument: **GC\_113**  
 Measured: **30.06.20 13:42**  
 Processing M.: **PAY-PA**  
 Report-File: **PAY-PA**

Testmessung: N<sub>2</sub> und N<sub>2</sub>O  
 Zuordnung mit Vergleichssubstanzen

| No. | Ret.Time<br>min | area-%<br>% | Peak Name        |
|-----|-----------------|-------------|------------------|
| 1   | 3,58            | 0,04        | Argon            |
| 2   | 3,66            | 1,04        | O <sub>2</sub>   |
| 3   | 5,88            | 56,87       | N <sub>2</sub>   |
| 4   | 41,67           | 42,05       | N <sub>2</sub> O |

Instrument parameters:

Column: 30,0 m HP-Plot 5A Molsieve 0,32/10,0df G/764  
 Temperature: 220/ 30, 10 min iso 6/min 250 12/min 320, 5 min iso/ 250  
 Gas: 0,50 bar He  
 Sample size: 250,0 µL

*v. Dieck*

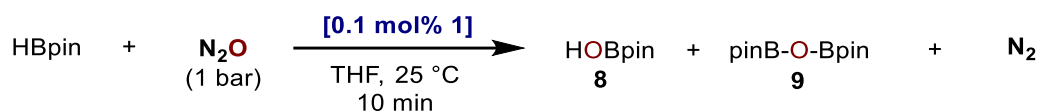

The stock solution of bismuthinidene (**1**) was prepared by dissolving 2.3 mg bismuthinidene (**1**) in 1.0 mL anhydrous and degassed THF in the glove box.

In the glove box, bismuthinidene (0.5  $\mu\text{mol}$ , 100  $\mu\text{L}$  stock solution, 0.1 mol%), 0.9 mL THF and HBpin (0.5 mmol, 72.5  $\mu\text{L}$ ) were added to a 15 mL oven-dried Schlenk tube. The Schlenk tube was sealed by a rubber septum and parafilm. And then it was taken out of the glove box and connected to a Schlenk line and a  $\text{N}_2\text{O}$  bottle via a three-way tubing system. The system was degassed by freeze-pump-thaw, backfilled with  $\text{N}_2\text{O}$  (1.0 bar) and rapidly stirred (750 rpm) for reaction. Violent release of  $\text{N}_2$  was observed and the color of the solution remained green. As the consumption of  $\text{N}_2\text{O}$  in the headspace, the  $\text{N}_2$  generation rate slowed down gradually. The ending point of the reaction was judged by the disappearance of green color of Bi(I) catalyst and the formation of black precipitate. The reaction time was about 10 min.

In the department of chromatography and electrophoresis, the headspace of the reaction was analyzed by GC-TCD.

The GC spectrum of catalytic N<sub>2</sub>O activation by bismuthinidene (1):

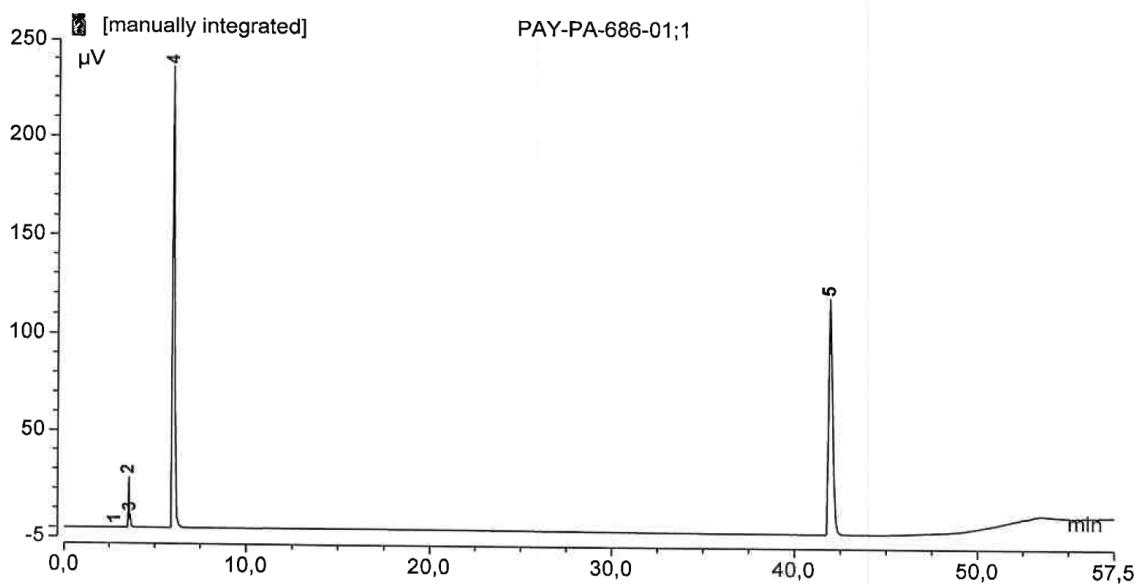

Sample: **PAY-PA-686-01;1**  
 Sequenz: **7587 PAY-PA VD**  
 Sequenz date: **18.08.20**

Instrument: **GC\_113**  
 Measured: **18.08.20 14:11**  
 Processing M.: **PAY-PA**  
 Report-File: **PAY-PA-686-01**

Zuordnung mit Vergleichssubstanzen

| No. | Ret.Time<br>min | area-%<br>% | Peak Name        |
|-----|-----------------|-------------|------------------|
| 1   | 2,84            | 0,02        |                  |
| 2   | 3,58            | 1,98        | Argon            |
| 3   | 3,66            | 0,61        | O <sub>2</sub>   |
| 4   | 5,95            | 50,27       | N <sub>2</sub>   |
| 5   | 41,91           | 47,12       | N <sub>2</sub> O |

Instrument parameters:

Column: 30,0 m HP-Plot 5A Molsieve 0,32/10,0df G/764  
 Temperature: 220/ 30, 10 min iso 6/min 250 12/min 320, 5 min iso/ 250  
 Gas: 0,50 bar He  
 Sample size: 250,0  $\mu\text{L}$

*V. Diethl*



The GC spectrum of catalytic N<sub>2</sub>O activation by bismuthinidene (4):

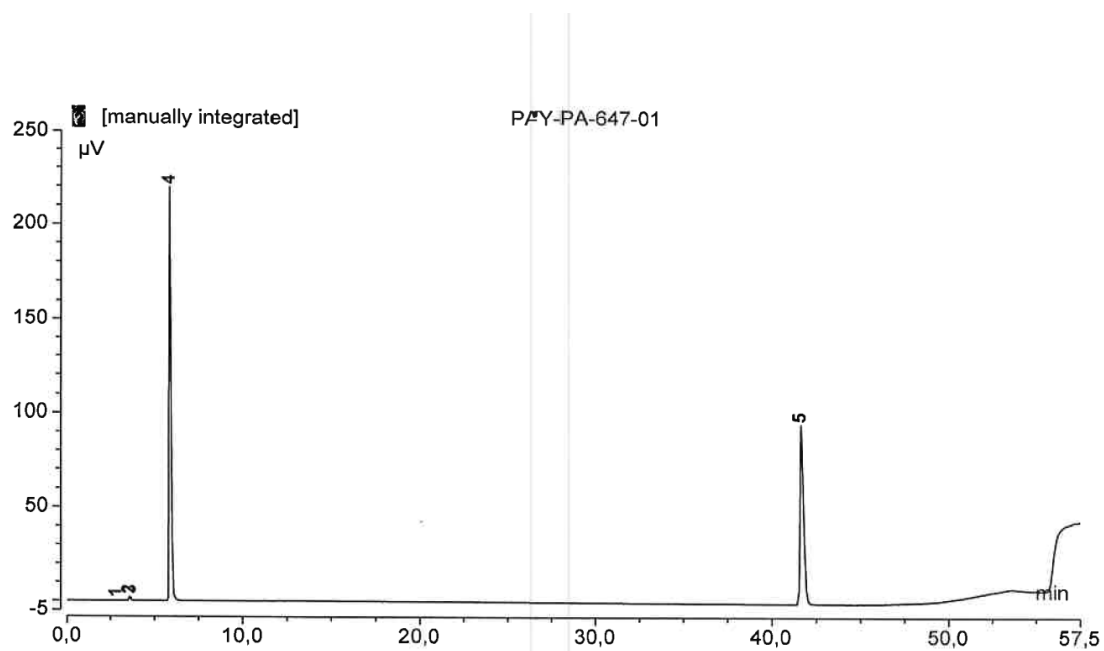

Sample: **PAY-PA-647-01**  
 Sequenz: **7484 PAY-PA VD**  
 Sequenz date: **02.07.20**

Instrument: **GC\_113**  
 Measured: **02.07.20 15:35**  
 Processing M.: **PAY-PA**  
 Report-File: **PAY-PA-647-01**

Zuordnung mit Vergleichssubstanzen

| No. | Ret. Time<br>min | area-%<br>% | Peak Name        |
|-----|------------------|-------------|------------------|
| 1   | 2,84             | 0,01        |                  |
| 2   | 3,57             | 0,19        | Argon            |
| 3   | 3,64             | 0,18        | O <sub>2</sub>   |
| 4   | 5,84             | 55,82       | N <sub>2</sub>   |
| 5   | 41,66            | 43,80       | N <sub>2</sub> O |

Instrument parameters:

Column: 30,0 m HP-Plot 5A Molsieve 0,32/10,0df G/764  
 Temperature: 220/ 30, 10 min iso 6/min 250 12/min 320, 5 min iso/ 250  
 Gas: 0 50 bar He  
 Sample size: 350,0 µL

*V. Ditzel*



## 10. References

- (1) (a) Vránová, I.; Alonso, M.; Lo, R.; Sedlák, R.; Jambor, R.; Růžička, A.; Proft, F. D.; Hobza, P.; Dostál, L., From Dibismuthenes to Three- and Two-Coordinated Bismuthinidenes by Fine Ligand Tuning: Evidence for Aromatic BiC<sub>3</sub>N Rings through a Combined Experimental and Theoretical Study. *Chem. Eur. J.* **2015**, *21*, 16917-16928; (b) Wang, F.; Planas, O.; Cornella, J., Bi(I)-Catalyzed Transfer-Hydrogenation with Ammonia-Borane. *J. Am. Chem. Soc.* **2019**, *141*, 4235-4240.
- (2) Hashimoto, T.; Shimazaki, Y.; Omatsu, Y.; Maruoka, K., Indanol-Based Chiral Organoiodine Catalysts for Enantioselective Hydrative Dearomatization. *Angew. Chem., Int. Ed.* **2018**, *57*, 7200-7204.
- (3) Courchay, F. C.; Sworen, J. C.; Ghiviriga, I.; Abboud, K. A.; Wagener, K. B., Understanding Structural Isomerization during Ruthenium-Catalyzed Olefin Metathesis: A Deuterium Labeling Study. *Organometallics* **2006**, *25*, 6074-6086.
- (4) Déziel, R.; Malenfant, E.; Bélanger, G., Practical Synthesis of (*R,R*)- and (*S,S*)-Bis[2,6-bis(1-ethoxyethyl)phenyl] Diselenide. *J. Org. Chem.* **1996**, *61*, 1875-1876.
- (5) Hyvl, J.; Yoshida, W. Y.; Rheingold, A. L.; Hughes, R. P.; Cain, M. F., A Masked Phosphinidene Trapped in a Fluxional NCN Pincer. *Chem. Eur. J.* **2016**, *22*, 17562-17565.
- (6) Šimon, P.; de Proft, F.; Jambor, R.; Růžička, A.; Dostál, L., Monomeric Organoantimony(I) and Organobismuth(I) Compounds Stabilized by an NCN Chelating Ligand: Syntheses and Structures. *Angew. Chem., Int. Ed.* **2010**, *49*, 5468-5471.
- (7) Vránová, I.; Jambor, R.; Růžička, A.; Jirásko, R.; Dostál, L., Reactivity of N,C,N-Chelated Antimony(III) and Bismuth(III) Chlorides with Lithium Reagents: Addition vs Substitution. *Organometallics* **2015**, *34*, 534-541.
- (8) Evans, R.; Dal Poggetto, G.; Nilsson, M.; Morris, G. A., Improving the Interpretation of Small Molecule Diffusion Coefficients. *Anal. Chem.* **2018**, *90*, 3987-3994.
- (9) Bagherzadeh, S.; Mankad, N. P., Catalyst Control of Selectivity in CO<sub>2</sub> Reduction Using a Tunable Heterobimetallic Effect. *J. Am. Chem. Soc.* **2015**, *137*, 10898-10901.
- (10) Hawkeswood, S.; Stephan, D. W., Syntheses and Reactions of the Bis-boryloxo O(Bpin)<sub>2</sub> (pin = O<sub>2</sub>C<sub>2</sub>Me<sub>4</sub>). *Dalton Trans.* **2005**, 2182-2187.
- (11) (a) Tskhovrebov, A. G.; Solari, E.; Wodrich, M. D.; Scopelliti, R.; Severin, K., Covalent Capture of Nitrous Oxide by *N*-Heterocyclic Carbenes. *Angew. Chem., Int. Ed.* **2012**, *51*, 232-234; (b) Tskhovrebov, A. G.; Vuichoud, B.; Solari, E.; Scopelliti, R.; Severin, K., Adducts of Nitrous Oxide and *N*-Heterocyclic Carbenes: Syntheses, Structures, and Reactivity. *J. Am. Chem. Soc.* **2013**, *135*, 9486-9492.
- (12) (a) Matano, Y.; Nomura, H., Dimeric Triarylbiomuthane Oxide: A Novel Efficient Oxidant for the Conversion of Alcohols to Carbonyl Compounds. *J. Am. Chem. Soc.* **2001**, *123*, 6443-6444; (b) Matano, Y.; Nomura, H.; Hisanaga, T.; Nakano, H.; Shiro, M.; Imahori, H., Diverse Structures and Remarkable Oxidizing Ability of Triarylbiomuthane Oxides. Comparative Study on the Structure and Reactivity of a Series of Triarylpnictogen Oxides. *Organometallics* **2004**, *23*, 5471-5480.
- (13) (a) Sasamori, T.; Arai, Y.; Takeda, N.; Okazaki, R.; Furukawa, Y.; Kimura, M.; Nagase, S.; Tokitoh, N., Syntheses, Structures and Properties of Kinetically Stabilized Distibenes and Dibismuthenes, Novel Doubly Bonded Systems between Heavier Group 15 Elements. *Bull. Chem. Soc. Jpn.* **2002**, *75*, 661-675; (b) Tokitoh, N.; Arai, Y.; Okazaki, R.; Nagase, S., Synthesis and Characterization of a Stable Dibismuthene: Evidence for a Bi-Bi Double Bond. *Science* **1997**, *277*, 78-80.
- (14) Strímb, G.; Pöllnitz, A.; Raț, C. I.; Silvestru, C., A General Route to Monoorganopnicogen(III) (M = Sb, Bi) Compounds with a Pincer (N,C,N) Group and Oxo Ligands. *Dalton Trans.* **2015**, *44*, 9927-9942.

- (15) (a) Breunig, H. J.; Königsman, L.; Lork, E.; Nema, M.; Philipp, N.; Silvestru, C.; Soran, A.; Varga, R. A.; Wagner, R., Hypervalent Organobismuth(III) Carbonate, Chalcogenides and Halides with the Pendant Arm Ligands 2-(Me<sub>2</sub>NCH<sub>2</sub>)C<sub>6</sub>H<sub>4</sub> and 2,6-(Me<sub>2</sub>NCH<sub>2</sub>)<sub>2</sub>C<sub>6</sub>H<sub>3</sub>. *Dalton Trans.* **2008**, 1831-1842; (b) Chovancová, M.; Jambor, R.; Růžička, A.; Jirásko, R.; Císařová, I.; Dostál, L., Synthesis, Structure, and Reactivity of Intramolecularly Coordinated Organoantimony and Organobismuth Sulfides. *Organometallics* **2009**, *28*, 1934-1941.
- (16) Kather, R.; Svoboda, T.; Wehrhahn, M.; Rychagova, E.; Lork, E.; Dostál, L.; Ketkov, S.; Beckmann, J., Lewis-acid Induced Disaggregation of Dimeric Arylantimony Oxides. *Chem. Commun.* **2015**, *51*, 5932-5935.
- (17) Wang, Y.; Hu, H.; Zhang, J.; Cui, C., Comparison of Anionic and Lewis Acid Stabilized *N*-Heterocyclic Oxoboranes: Their Facile Synthesis from a Borinic Acid. *Angew. Chem., Int. Ed.* **2011**, *50*, 2816-2819.
- (18) (a) Hardman, N. J.; Twamley, B.; Power, P. P., (2,6-Mes<sub>2</sub>H<sub>3</sub>C<sub>6</sub>)<sub>2</sub>BiH, a Stable, Molecular Hydride of a Main Group Element of the Sixth Period, and Its Conversion to the Dibismuthene (2,6-Mes<sub>2</sub>H<sub>3</sub>C<sub>6</sub>)BiBi(2,6-Mes<sub>2</sub>C<sub>6</sub>H<sub>3</sub>). *Angew. Chem., Int. Ed.* **2000**, *39*, 2771-2773; (b) Balázs, G.; Breunig, H. J.; Lork, E., Synthesis and Characterization of R<sub>2</sub>SbH, R<sub>2</sub>BiH, and R<sub>2</sub>Bi–BiR<sub>2</sub> [R = (Me<sub>3</sub>Si)<sub>2</sub>CH]. *Organometallics* **2002**, *21*, 2584-2586.

# 11. NMR Spectra

<sup>1</sup>H NMR (CDCl<sub>3</sub>, 400 MHz)

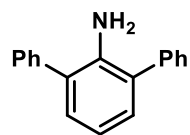

2,6-diphenylaniline

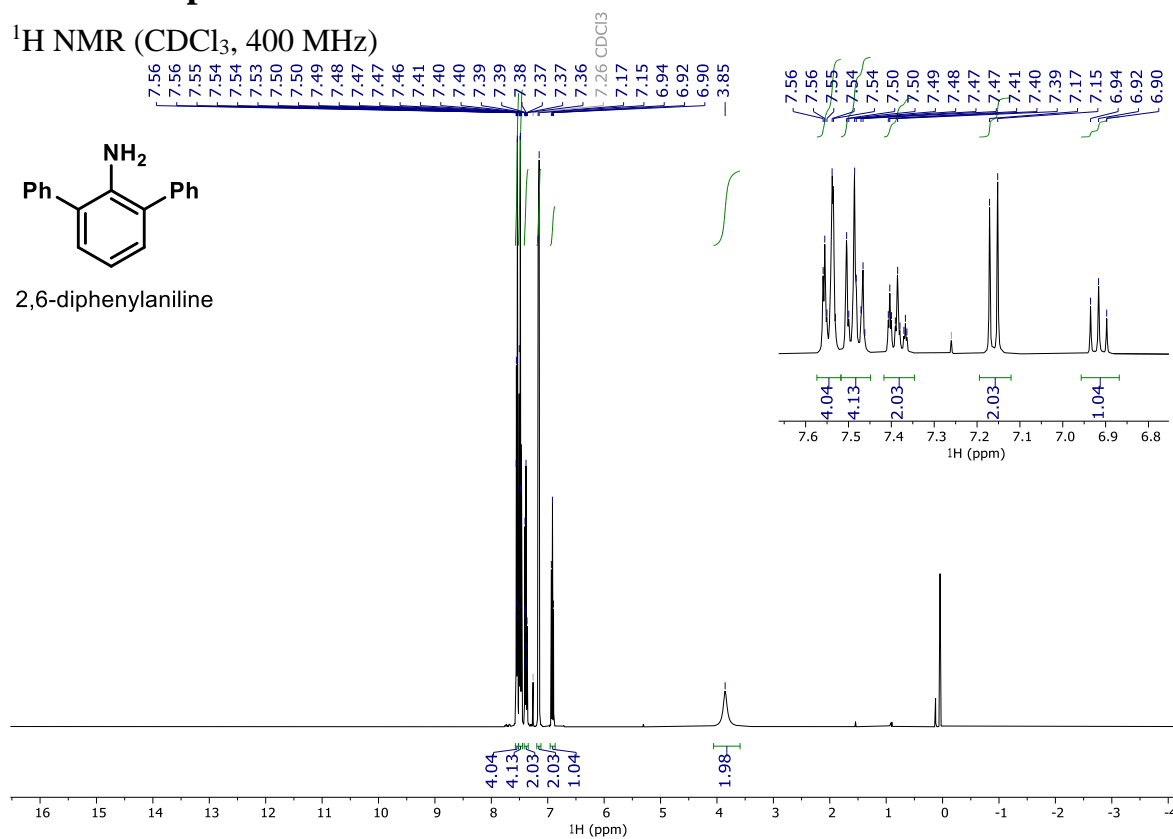

<sup>13</sup>C NMR (CDCl<sub>3</sub>, 101 MHz)

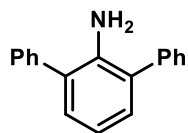

2,6-diphenylaniline

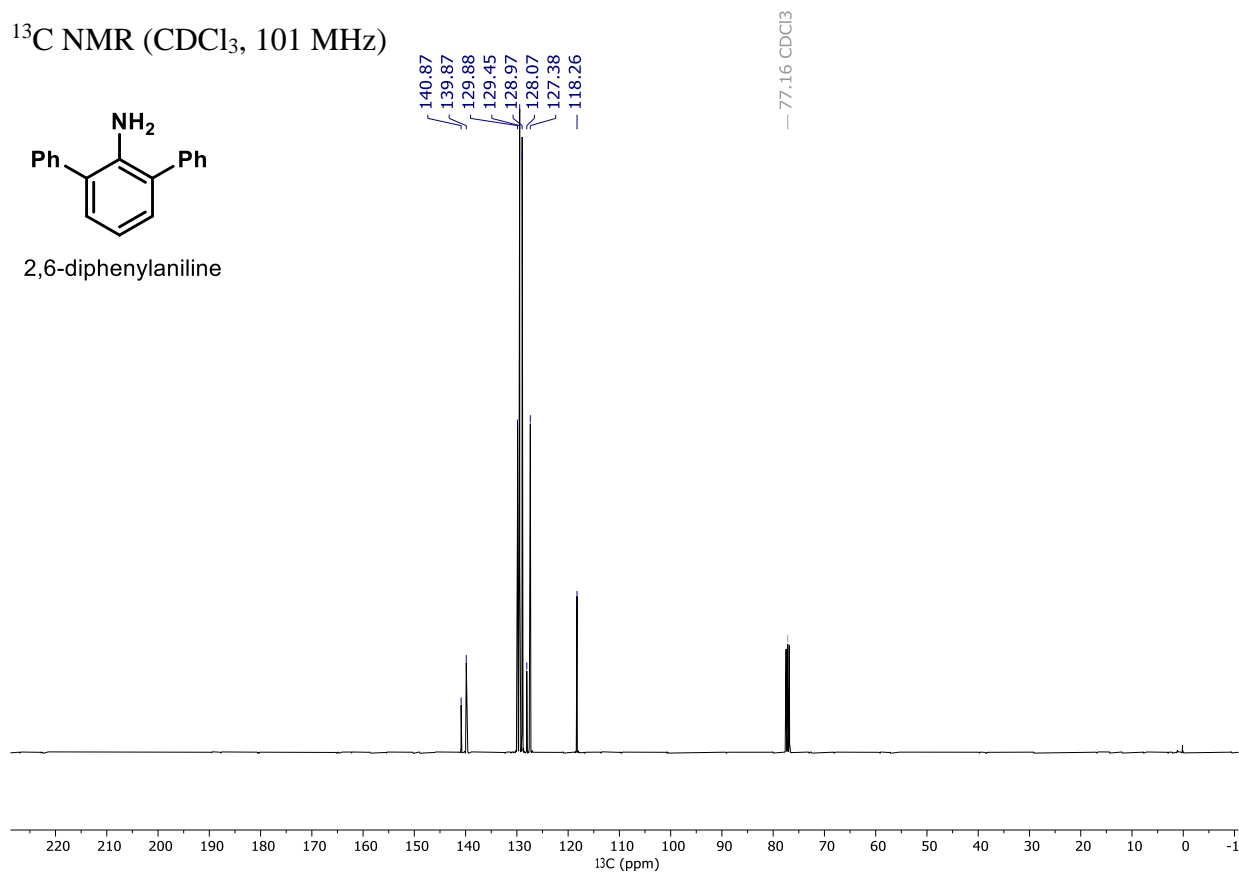

$^1\text{H}$  NMR ( $\text{CDCl}_3$ , 400 MHz)

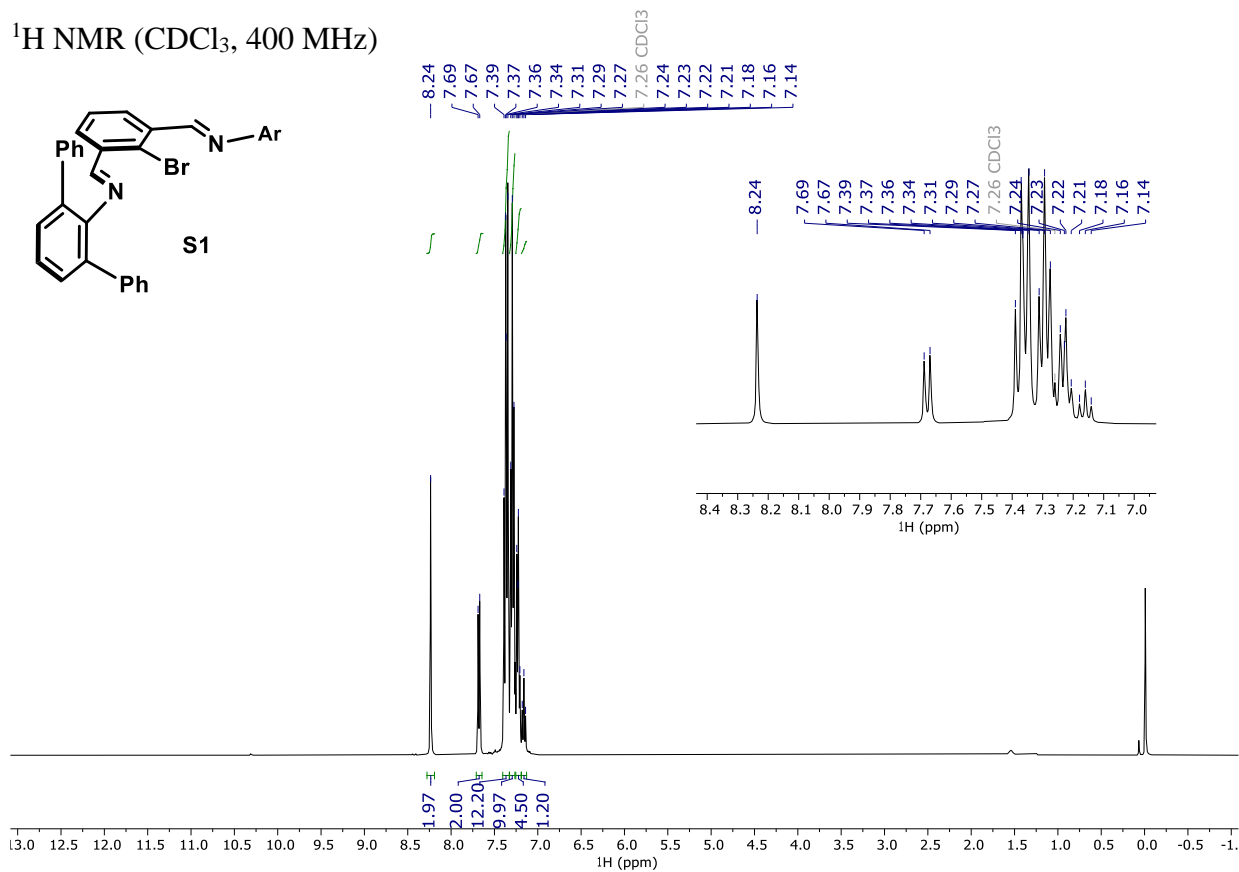

$^{13}\text{C}$  NMR ( $\text{CDCl}_3$ , 101 MHz)

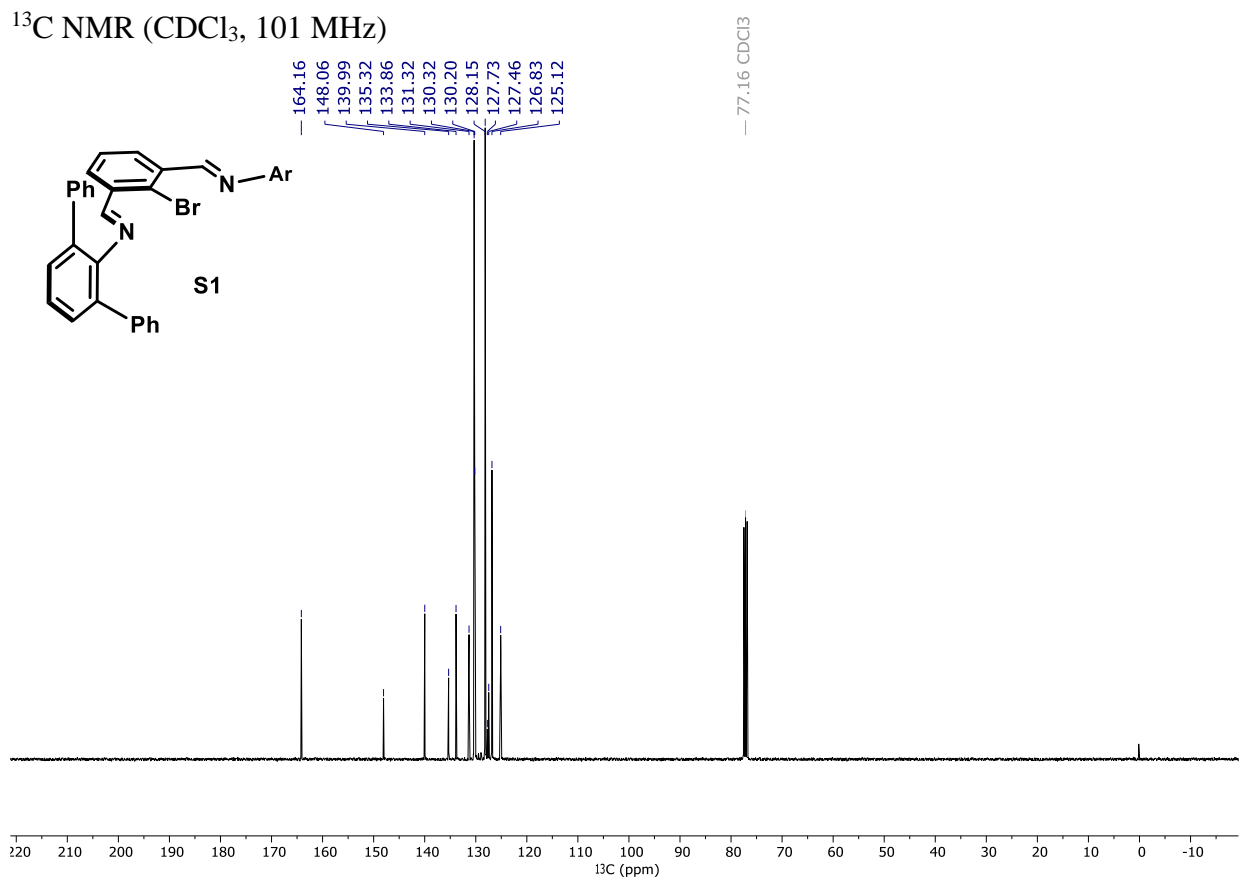

$^1\text{H}$  NMR ( $\text{CD}_3\text{OD}$ , 400 MHz)

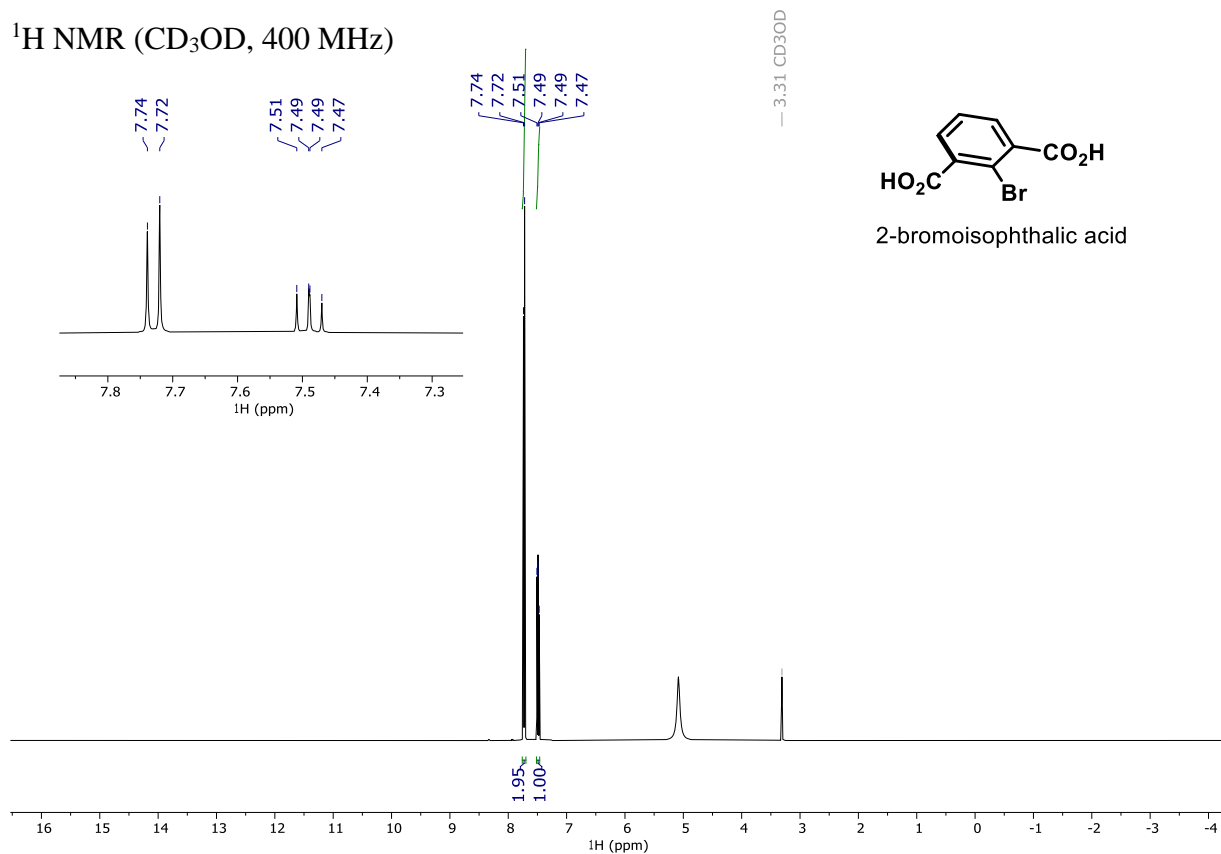

$^{13}\text{C}$  NMR ( $\text{CD}_3\text{OD}$ , 101 MHz)

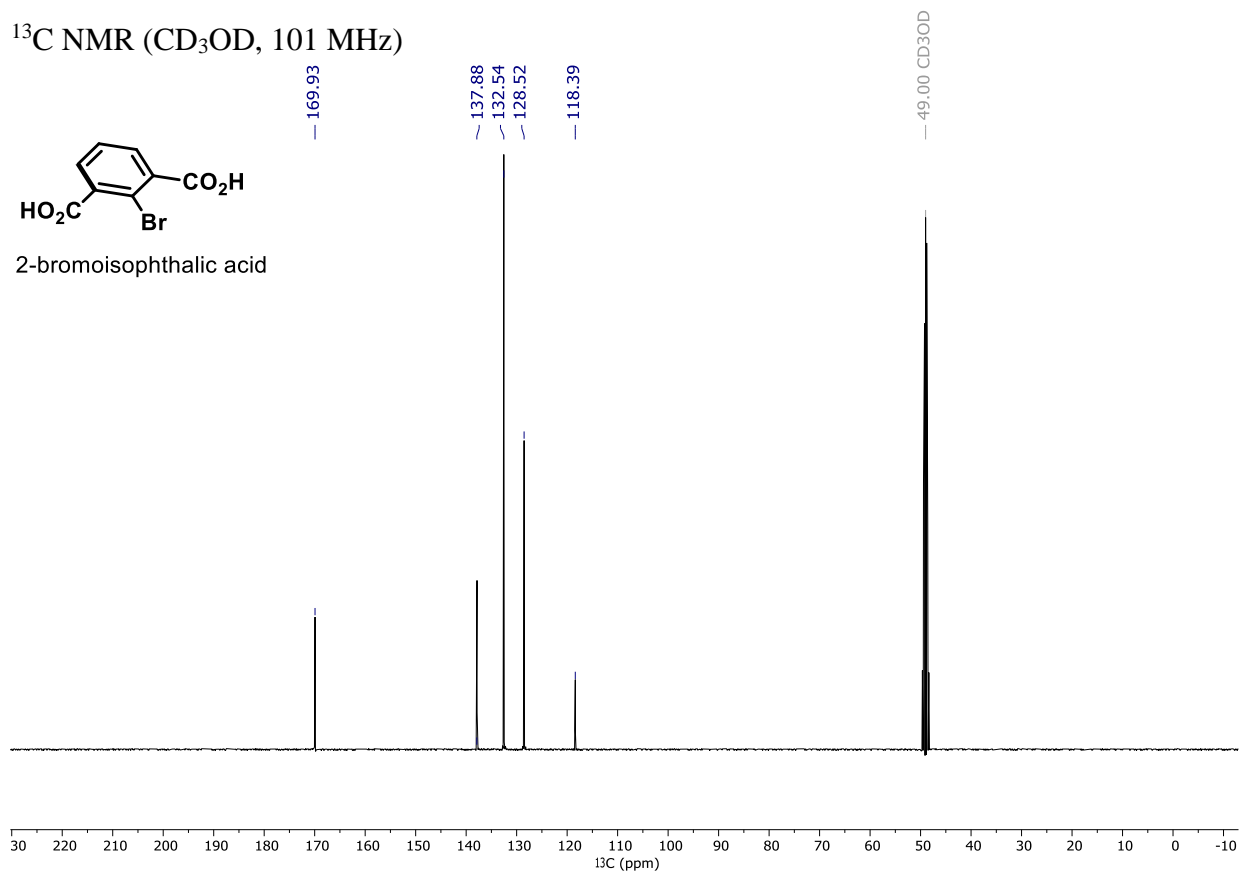

$^1\text{H}$  NMR ( $\text{CDCl}_3$ , 400 MHz)

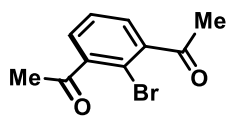

2,6-Diacetylbromobenzene

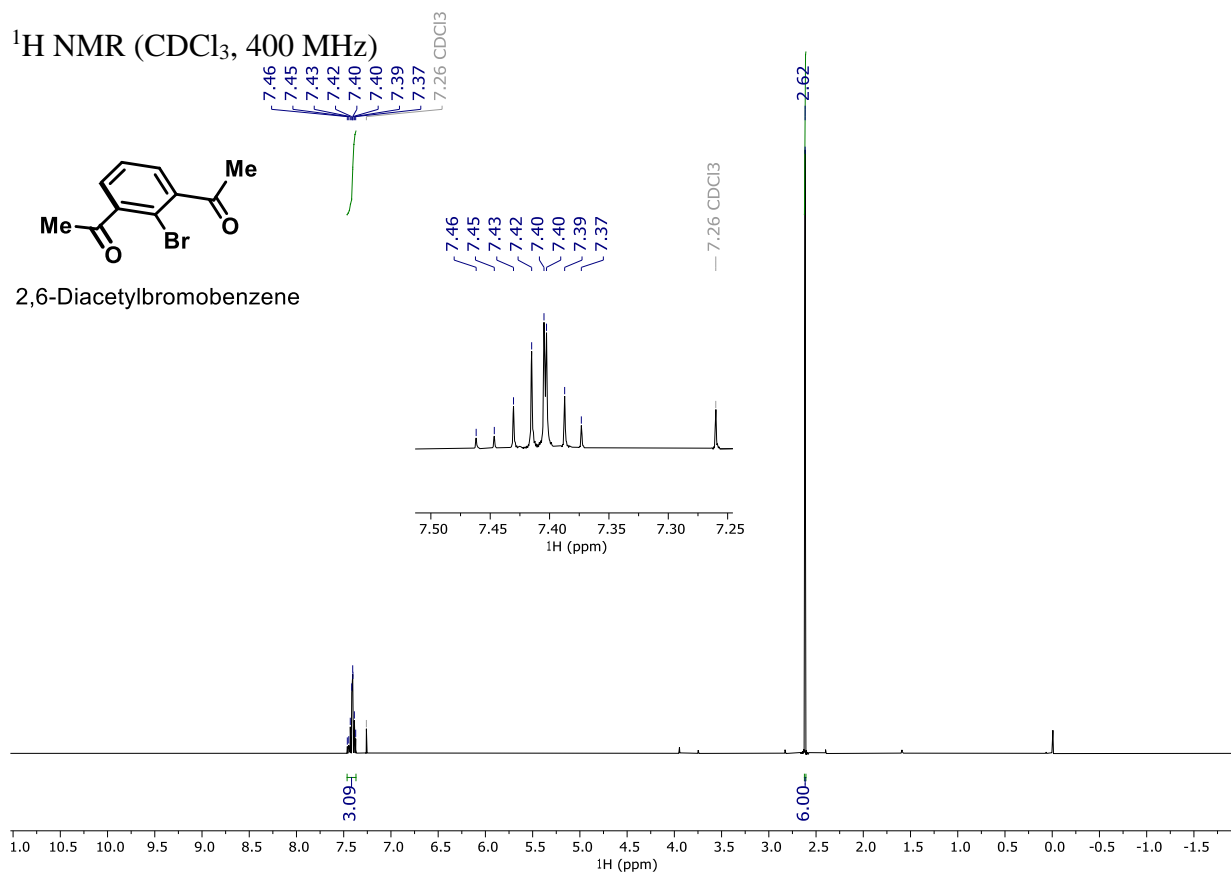

$^{13}\text{C}$  NMR ( $\text{CDCl}_3$ , 101 MHz)

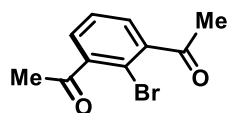

2,6-Diacetylbromobenzene

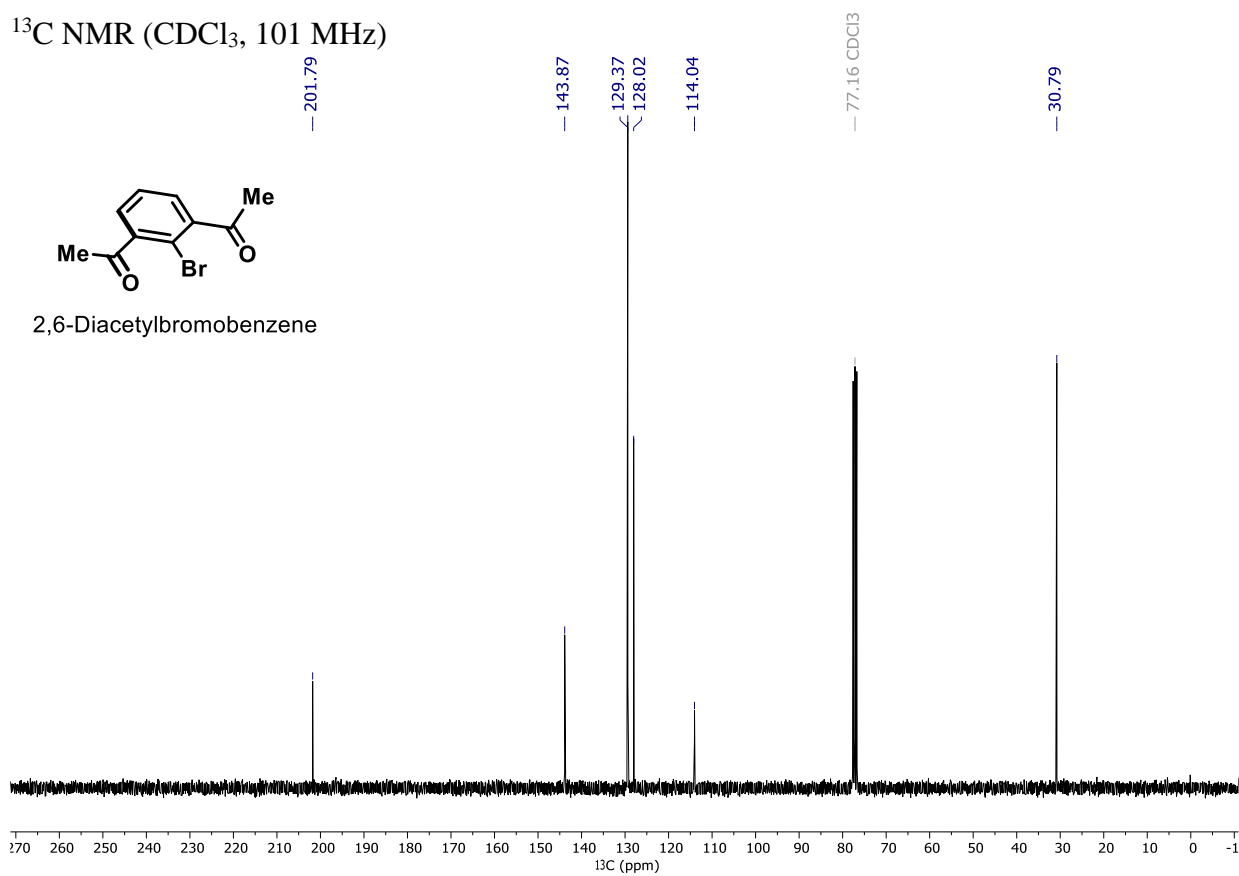

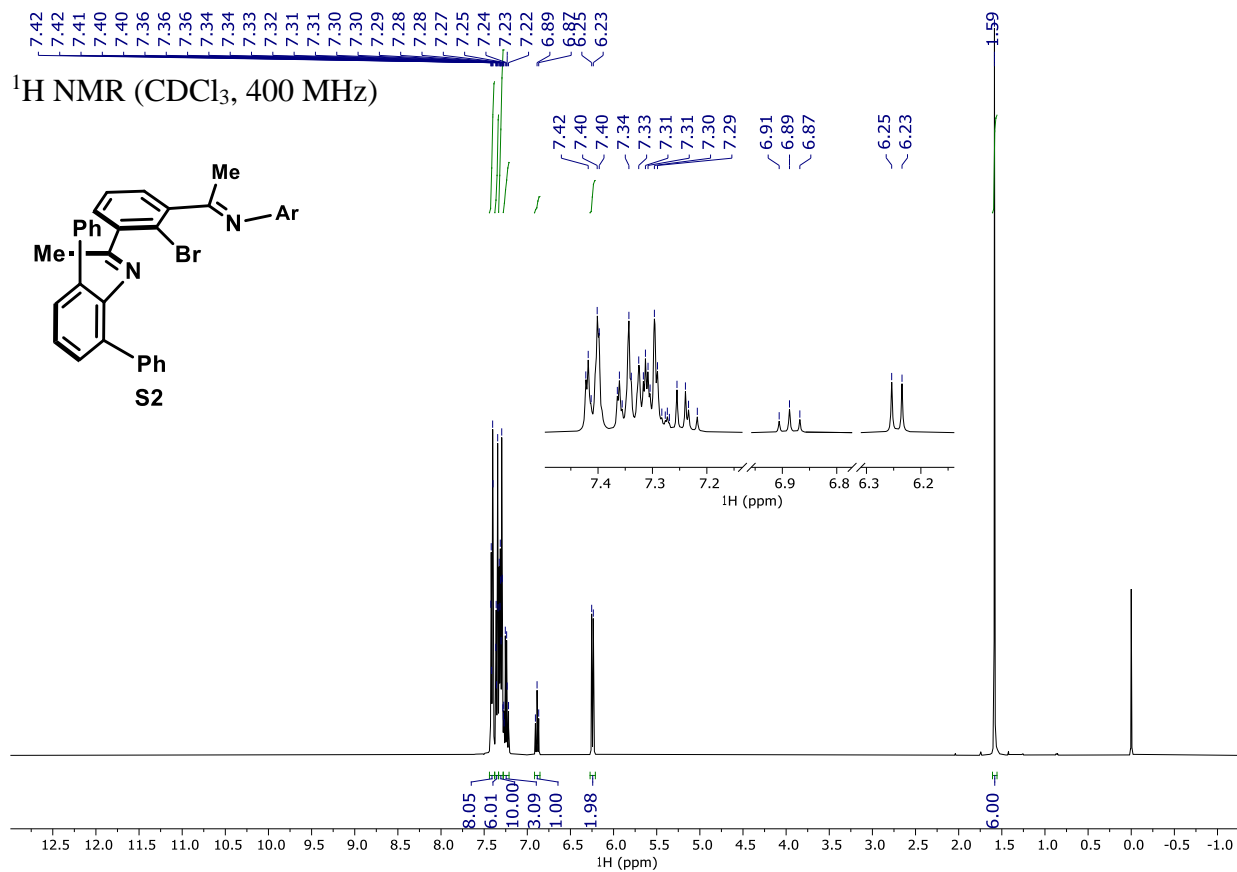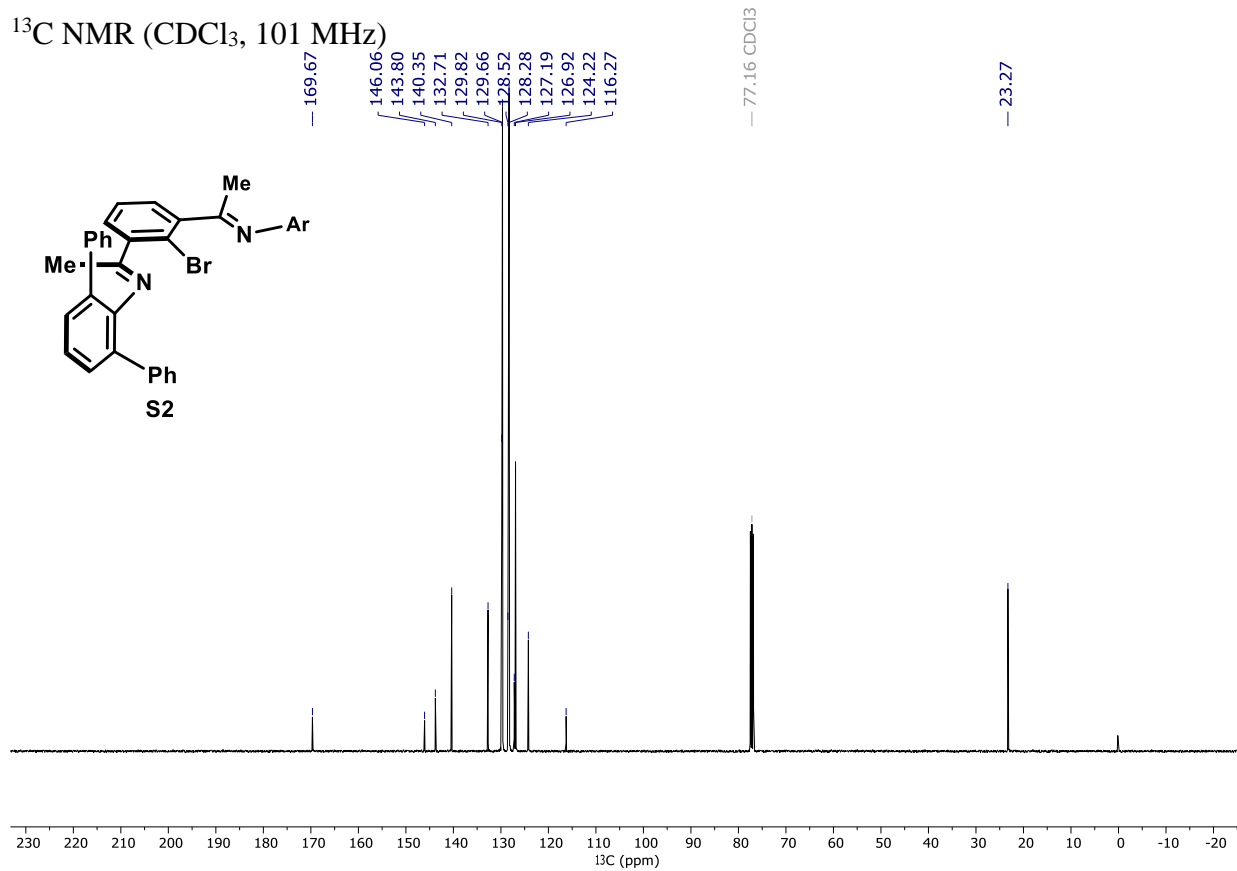

$^1\text{H}$  NMR ( $\text{CDCl}_3$ , 400 MHz)

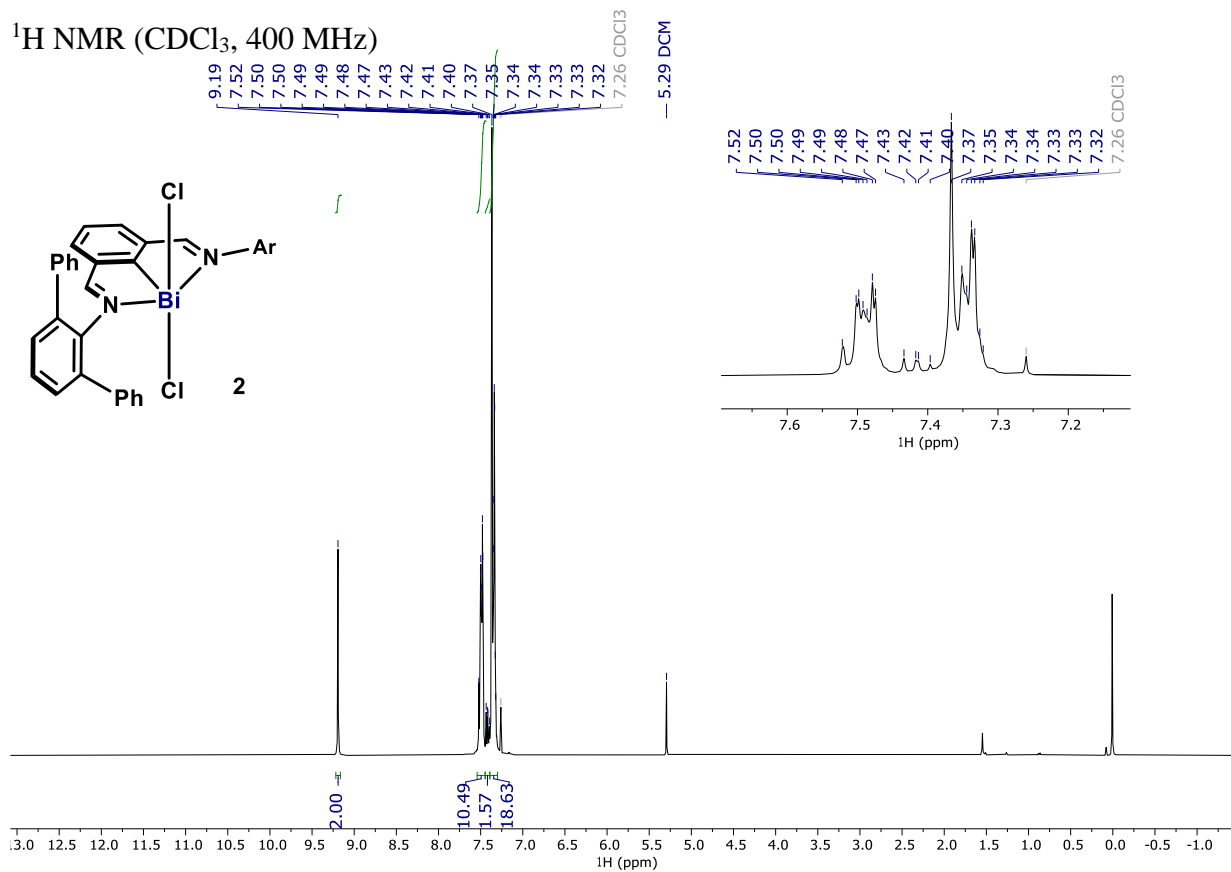

$^{13}\text{C}$  NMR ( $\text{CDCl}_3$ , 101 MHz)

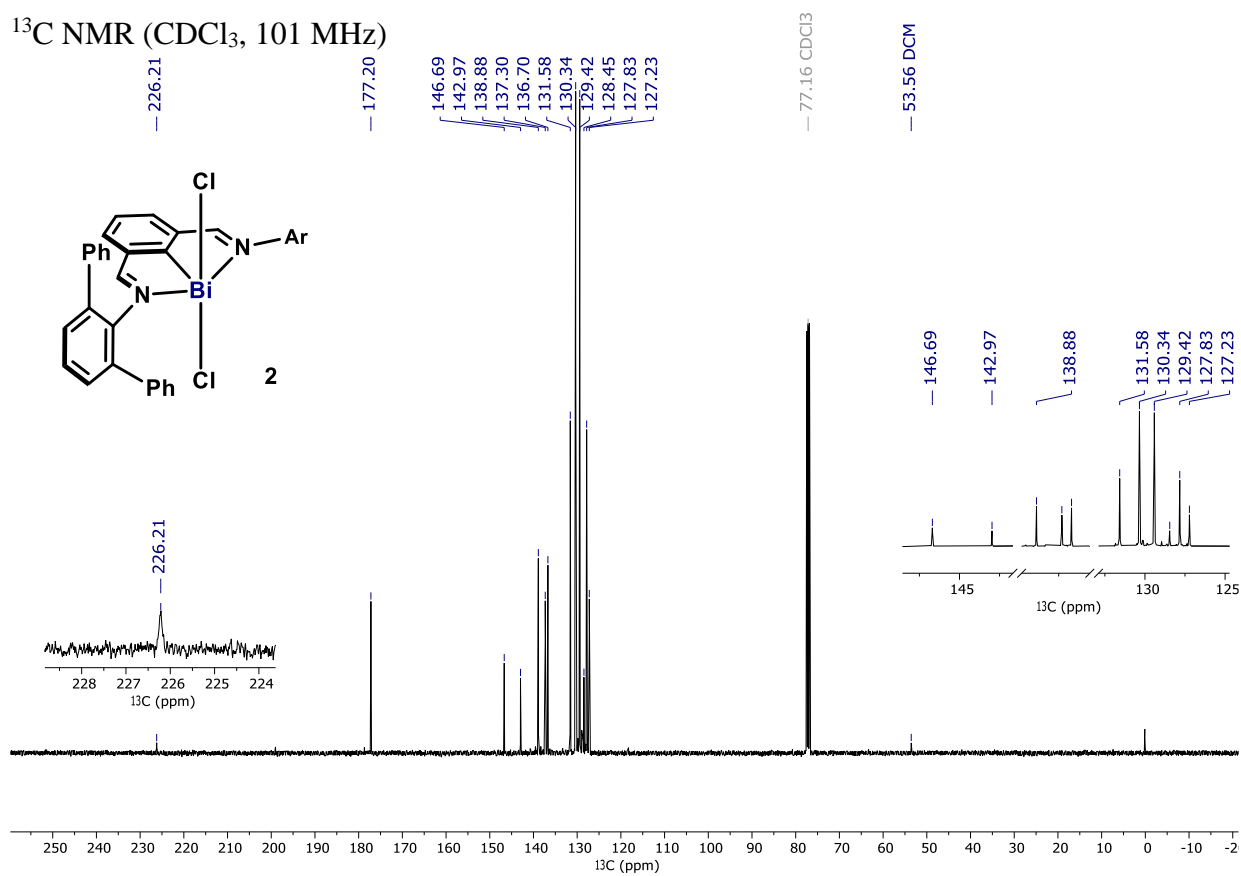



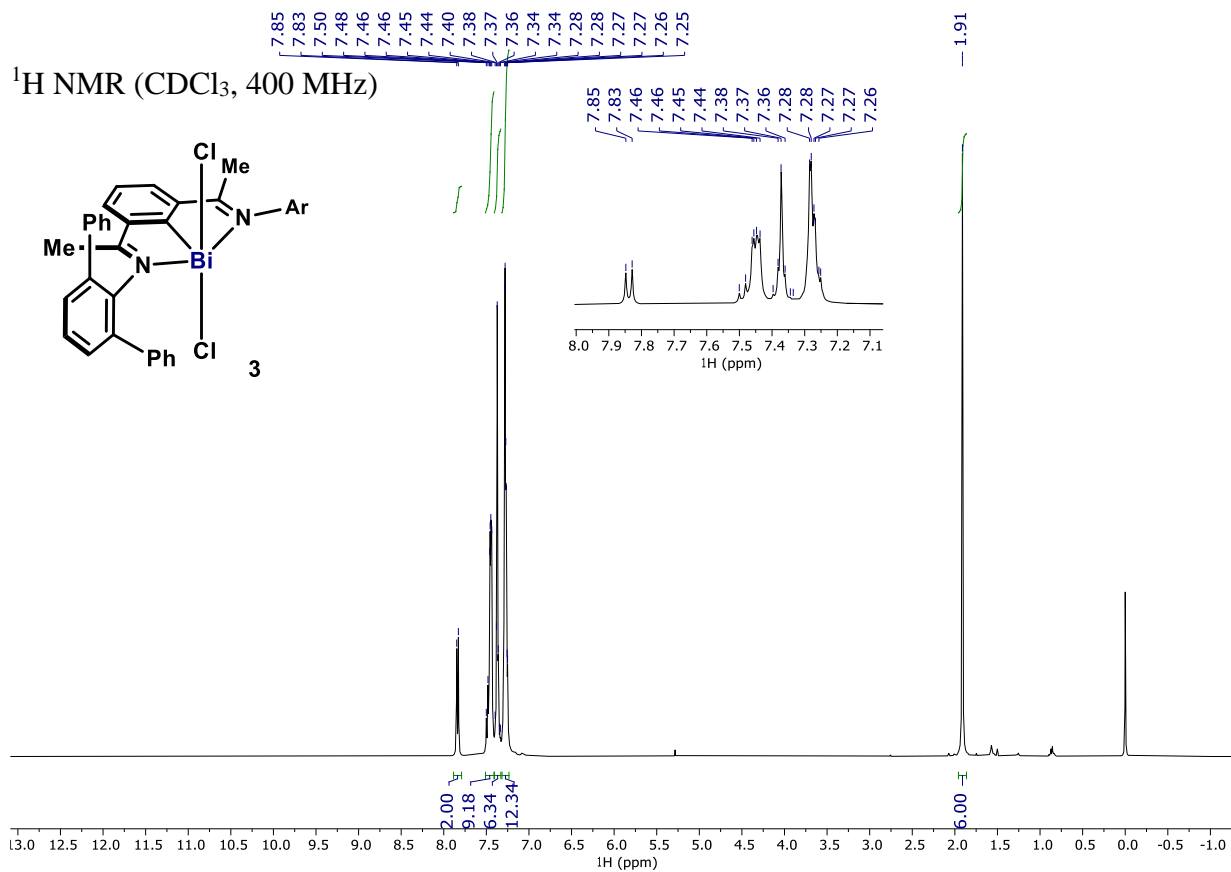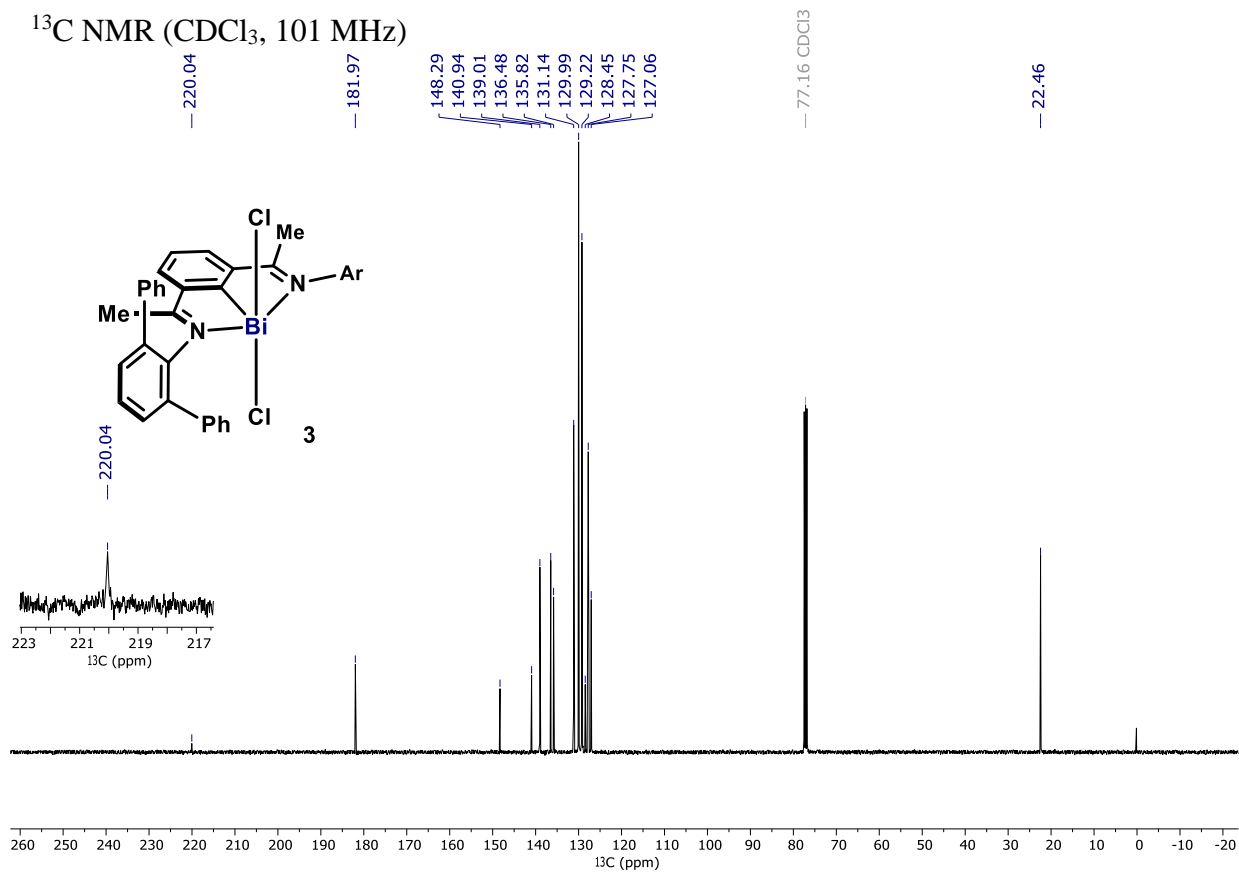

<sup>1</sup>H NMR (500 MHz, THF-d<sub>8</sub>)

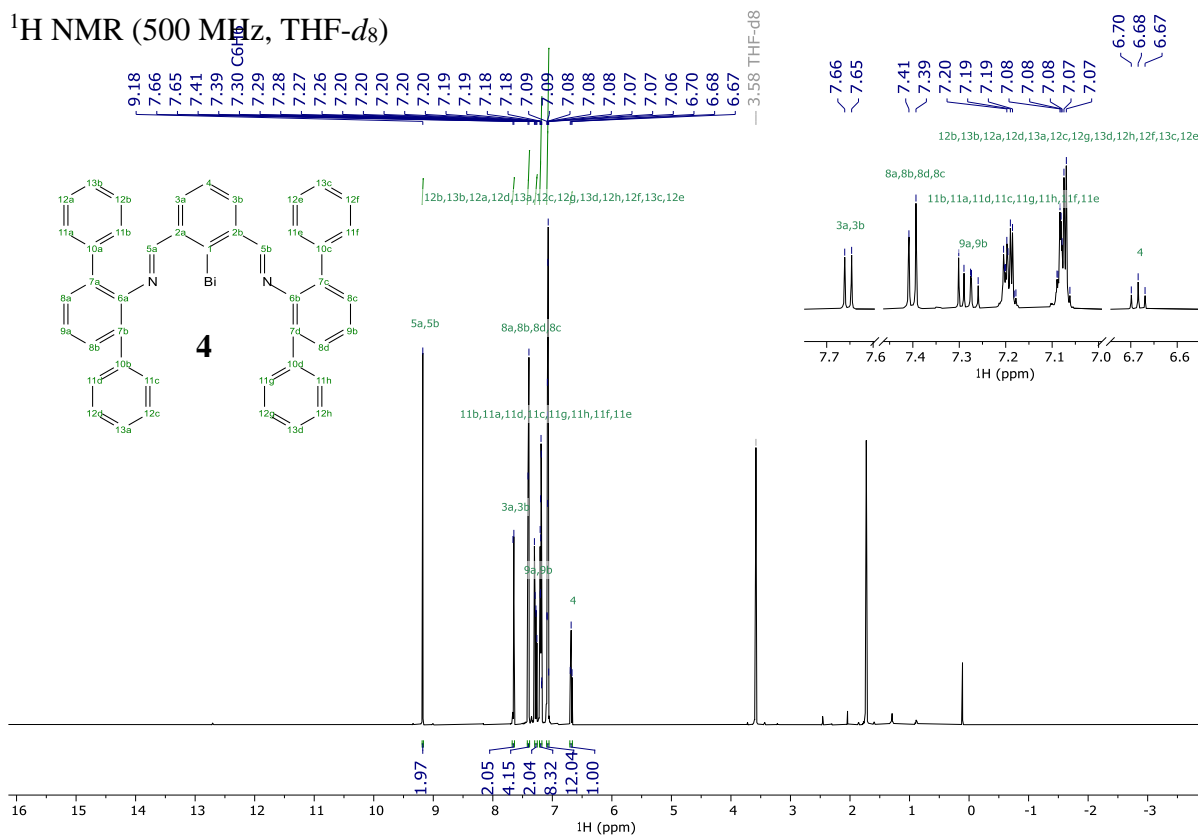

<sup>13</sup>C NMR (126 MHz, THF-d<sub>8</sub>)

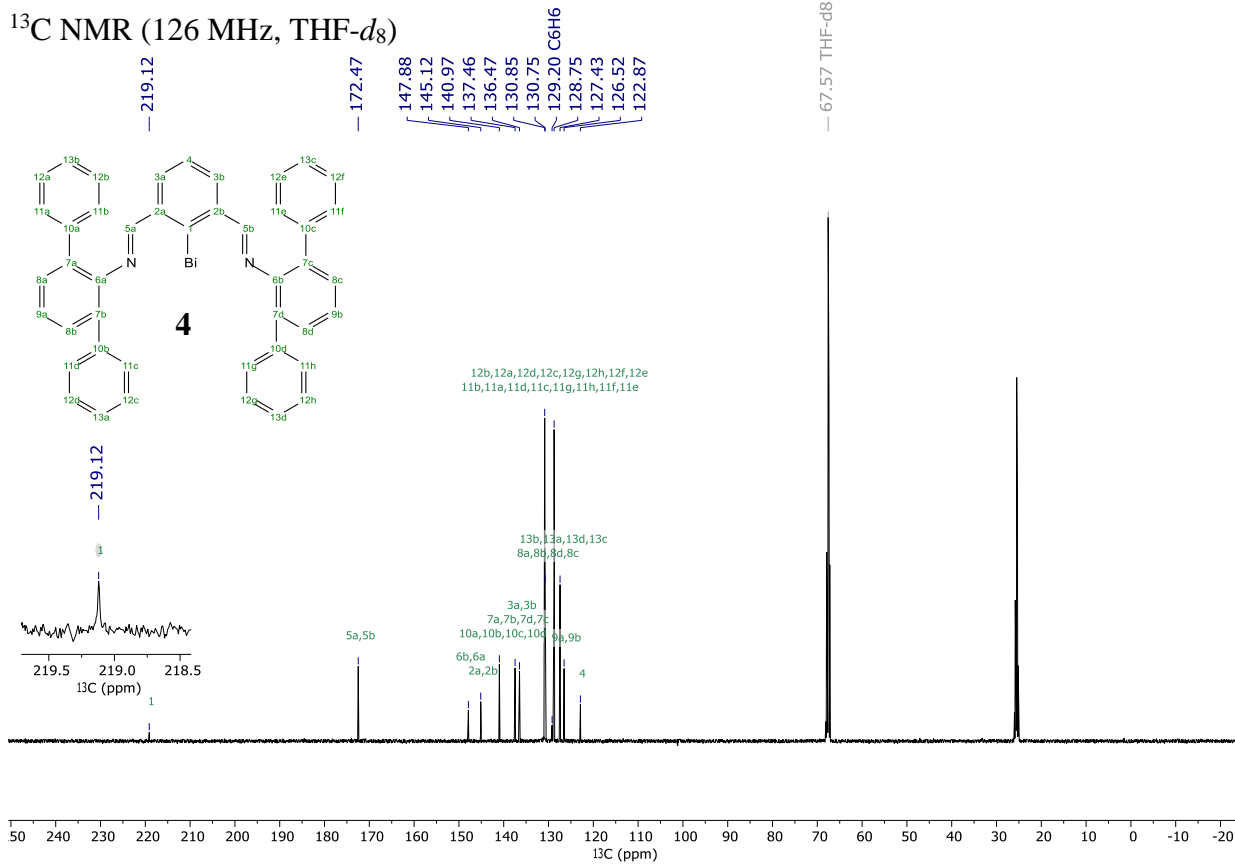

<sup>1</sup>H NMR (400 MHz, THF-d<sub>8</sub>)

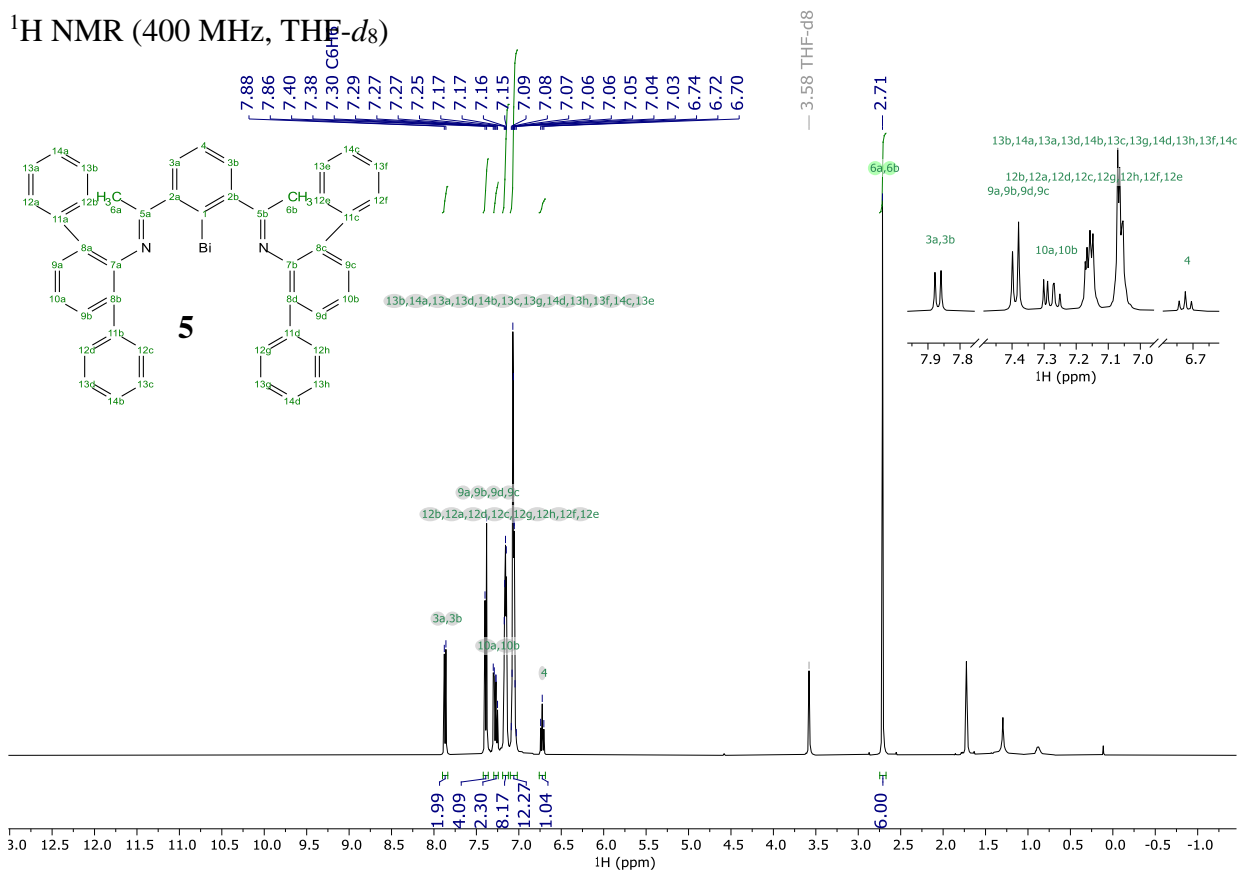

<sup>13</sup>C NMR (101 MHz, THF-d<sub>8</sub>)

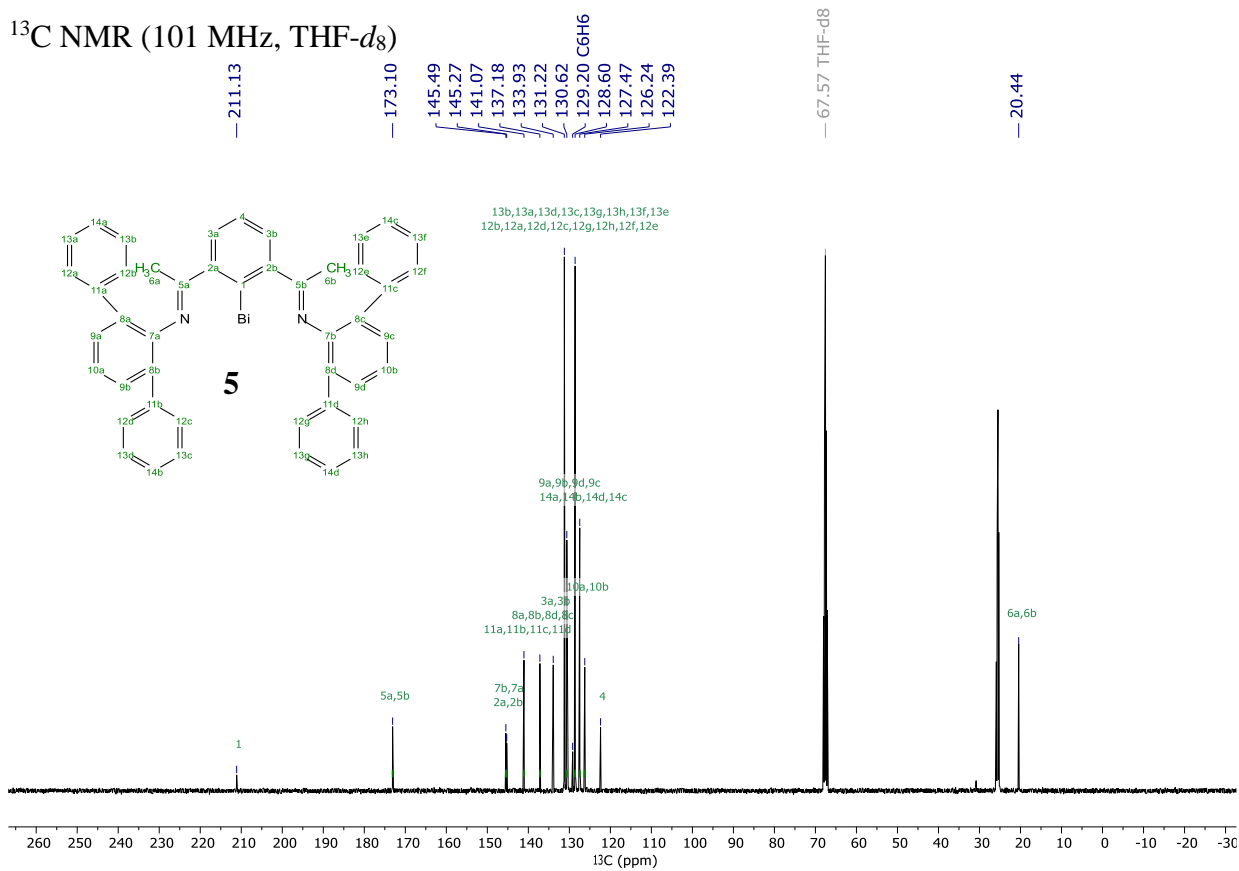



$^{13}\text{C}$  NMR (101 MHz, THF- $d_8$ ,  $-50\text{ }^\circ\text{C}$ )

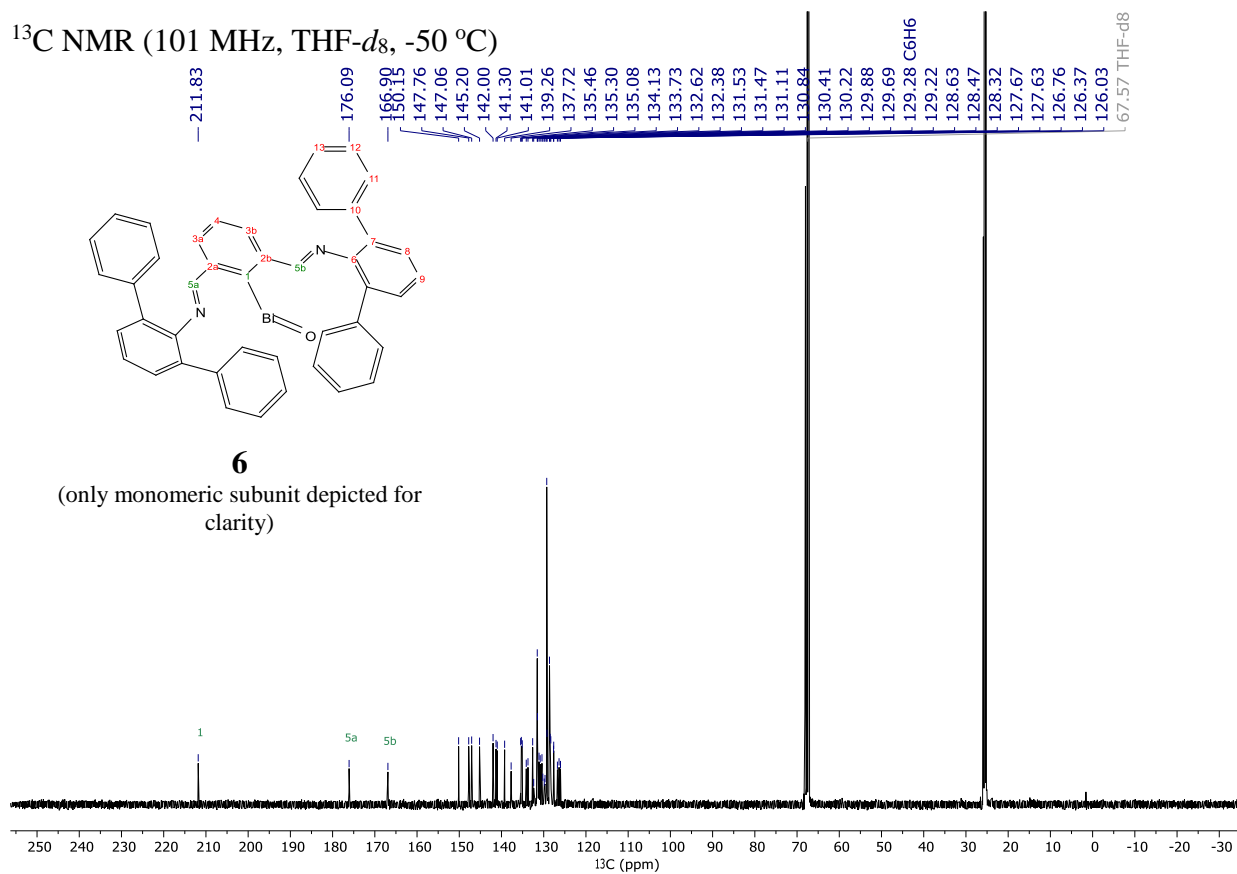

$^1\text{H}$  NMR (400 MHz,  $\text{THF-d}_8$ , 60 °C)

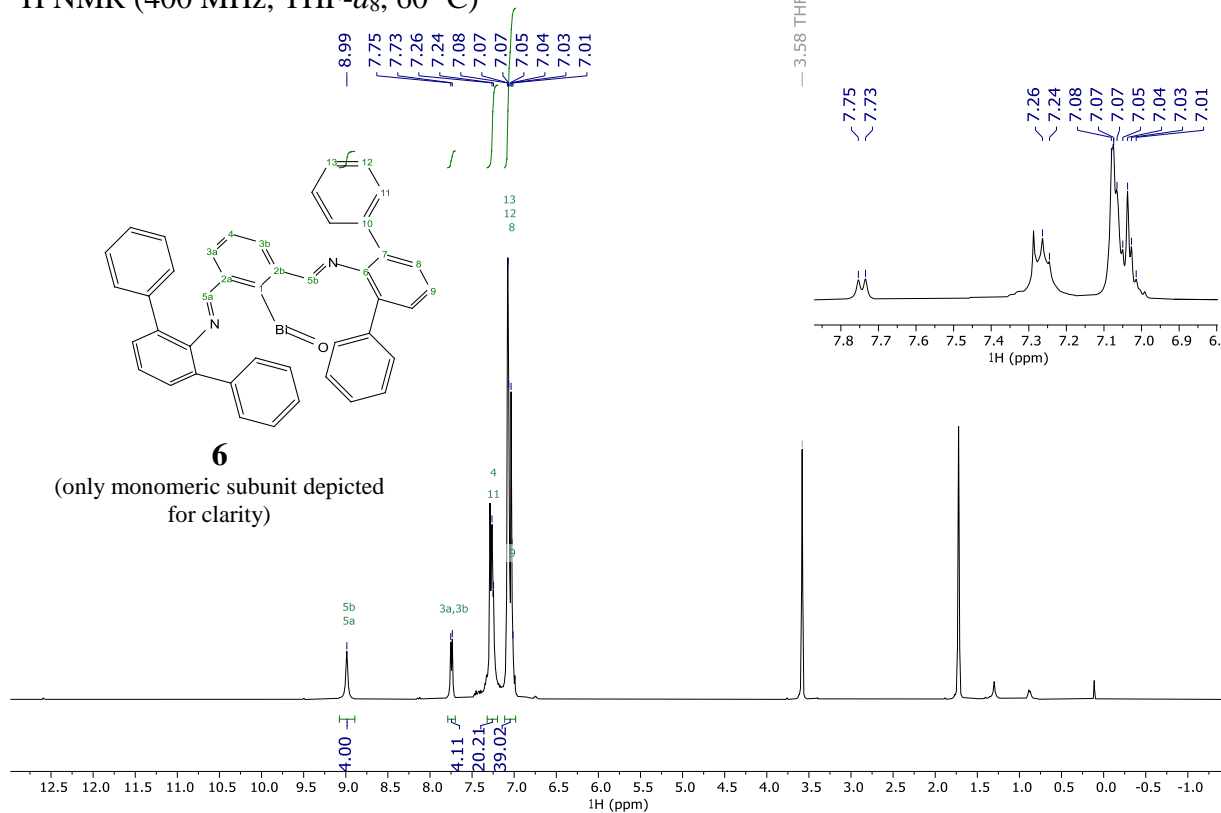

$^{13}\text{C}$  NMR (101 MHz,  $\text{THF-d}_8$ , 60 °C)

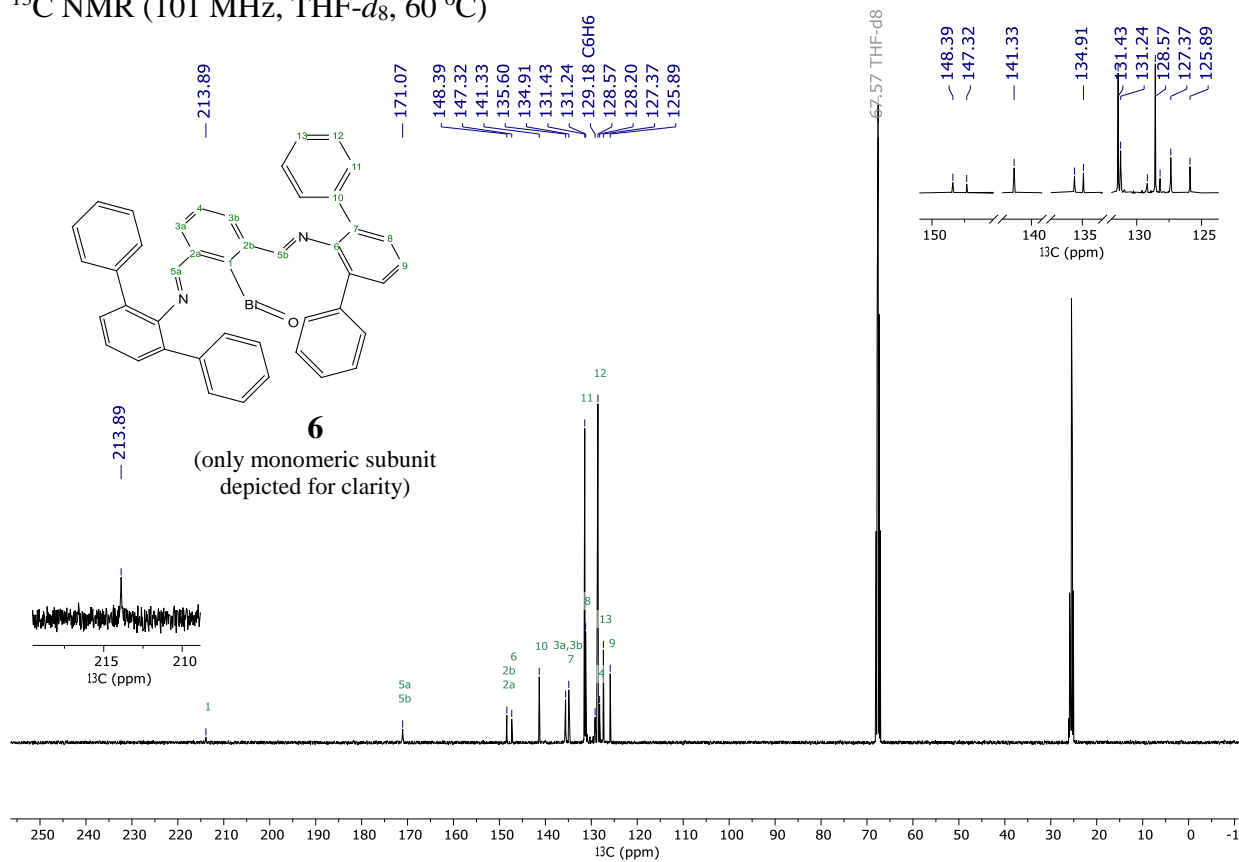

HSQC (-50 °C)

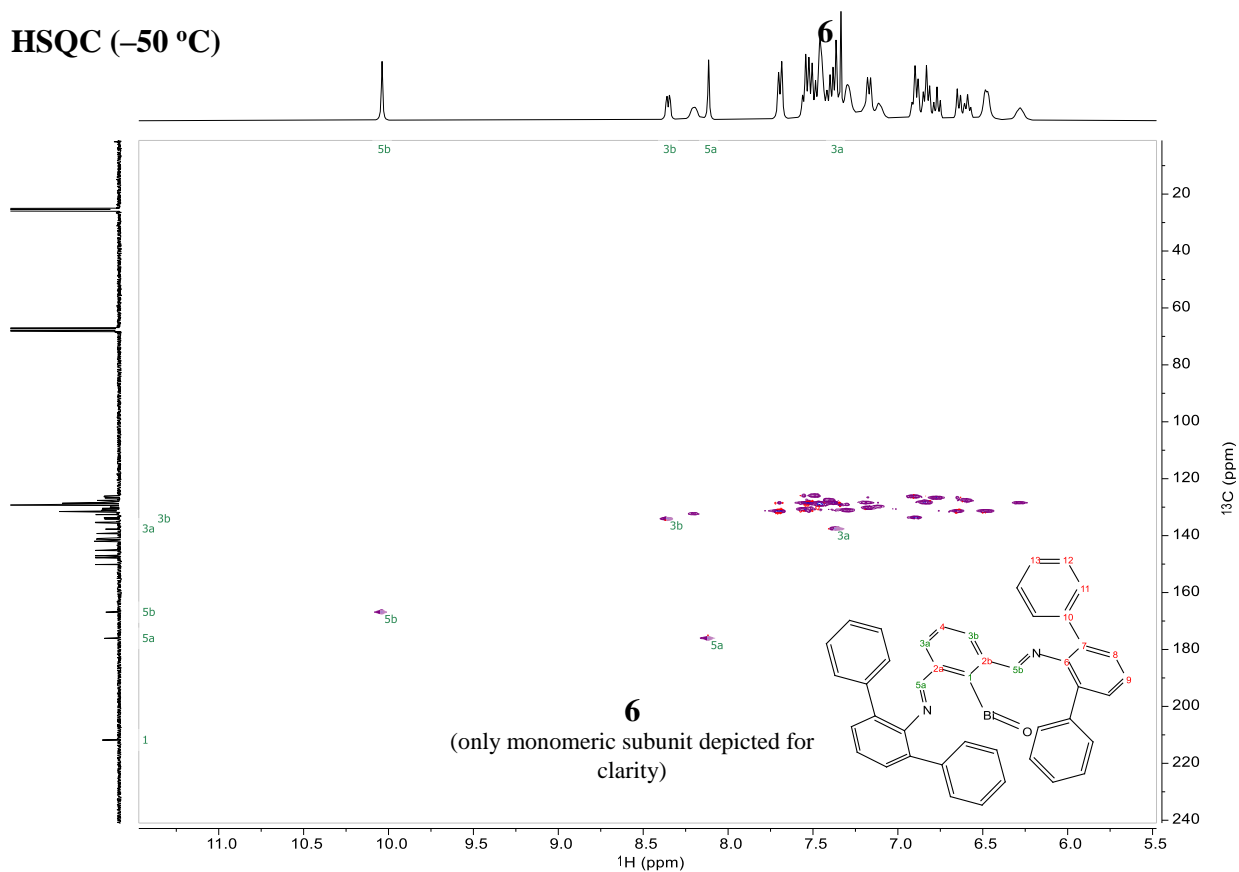

HMBC (-50 °C)

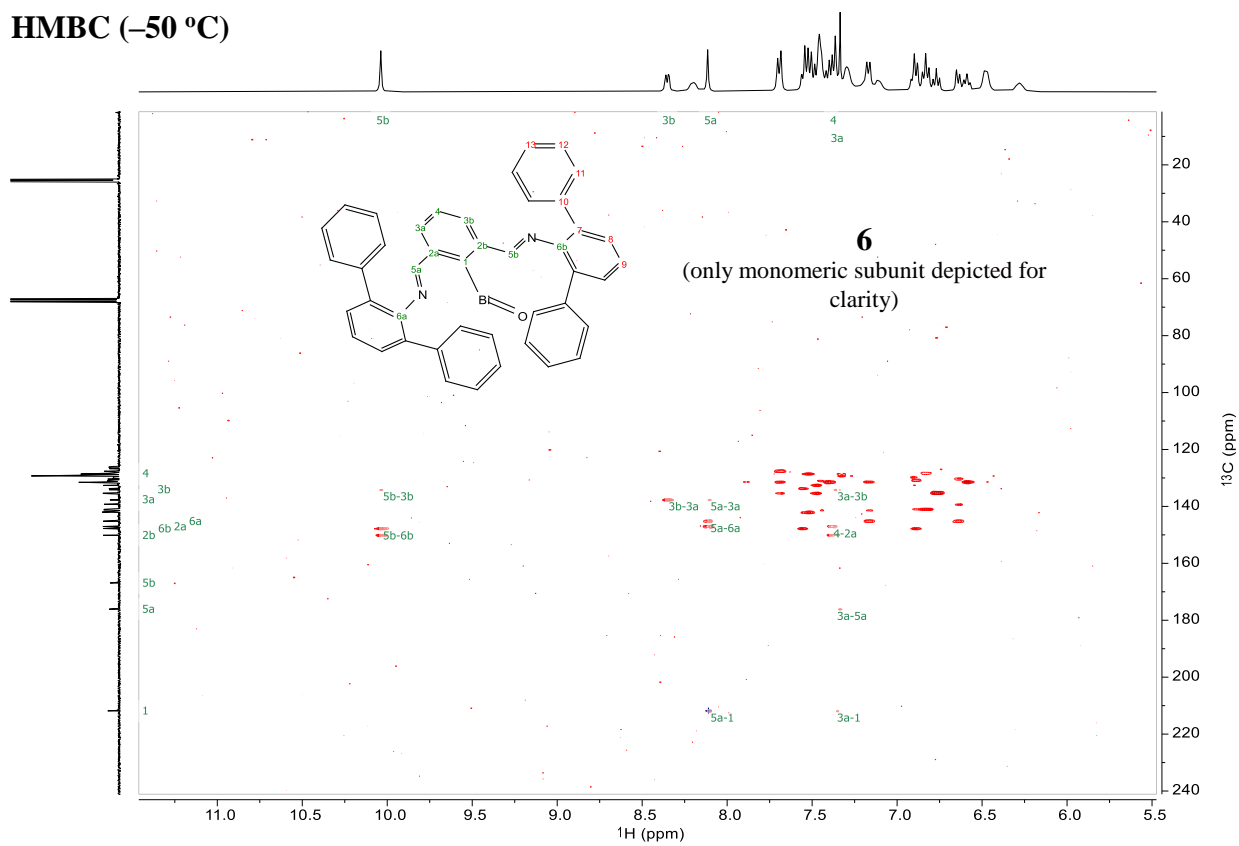

# ROESY (-50 °C)

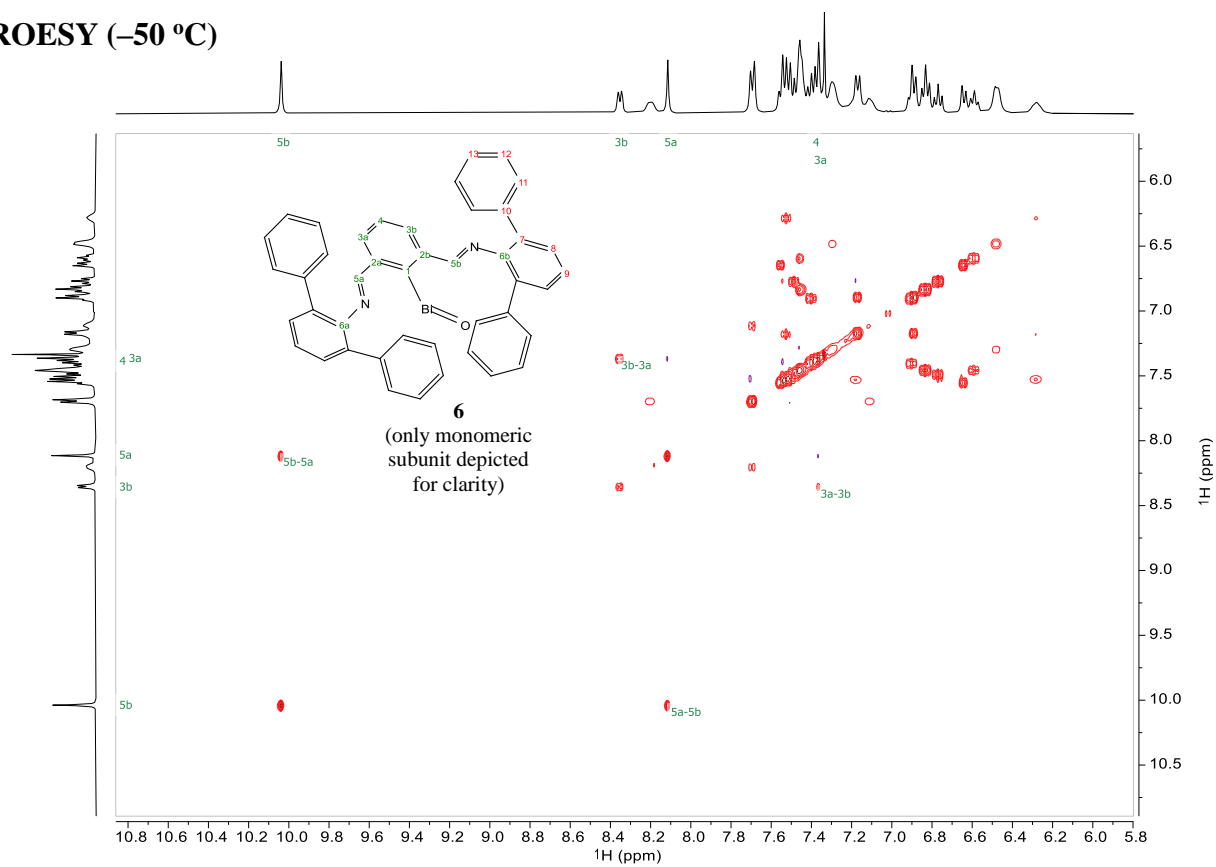



<sup>1</sup>H NMR (400 MHz, THF-d<sub>8</sub>, 25 °C)

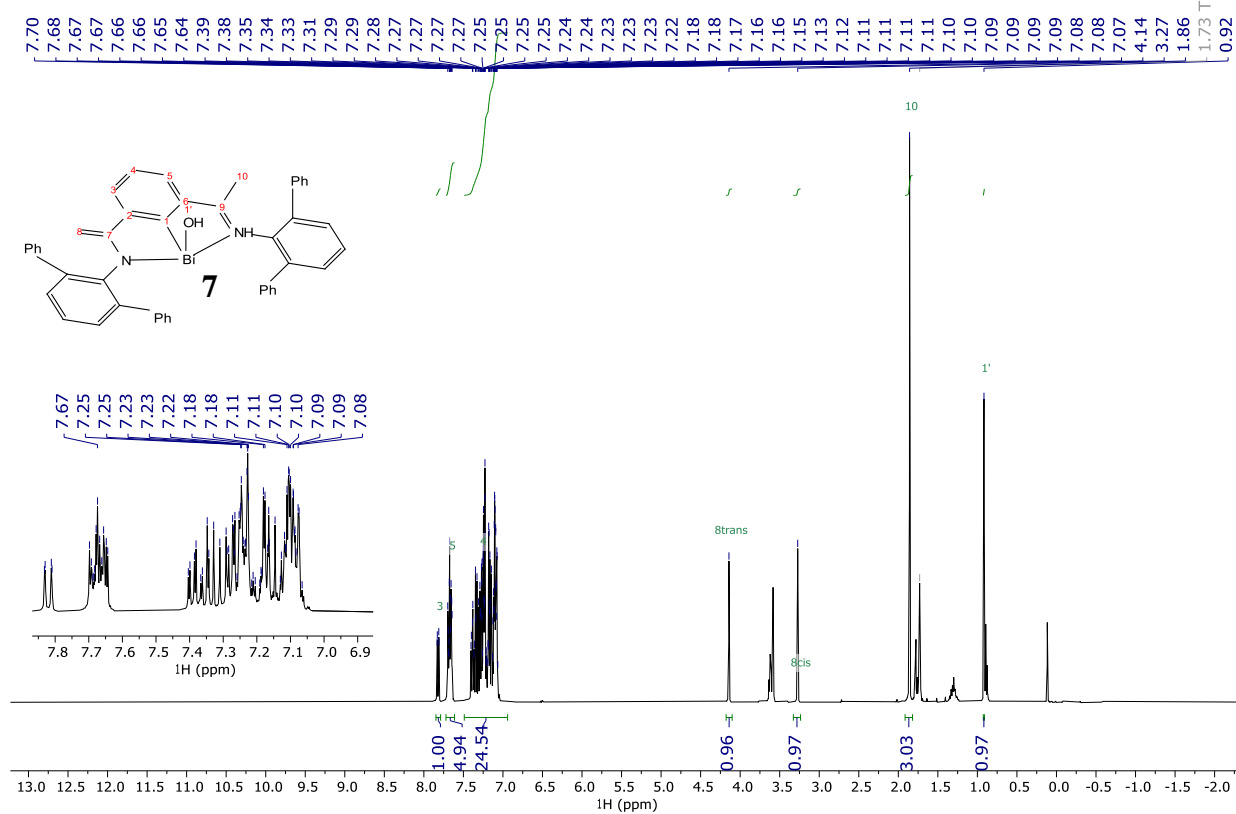

<sup>13</sup>C NMR (101 MHz, THF-d<sub>8</sub>, 25 °C)

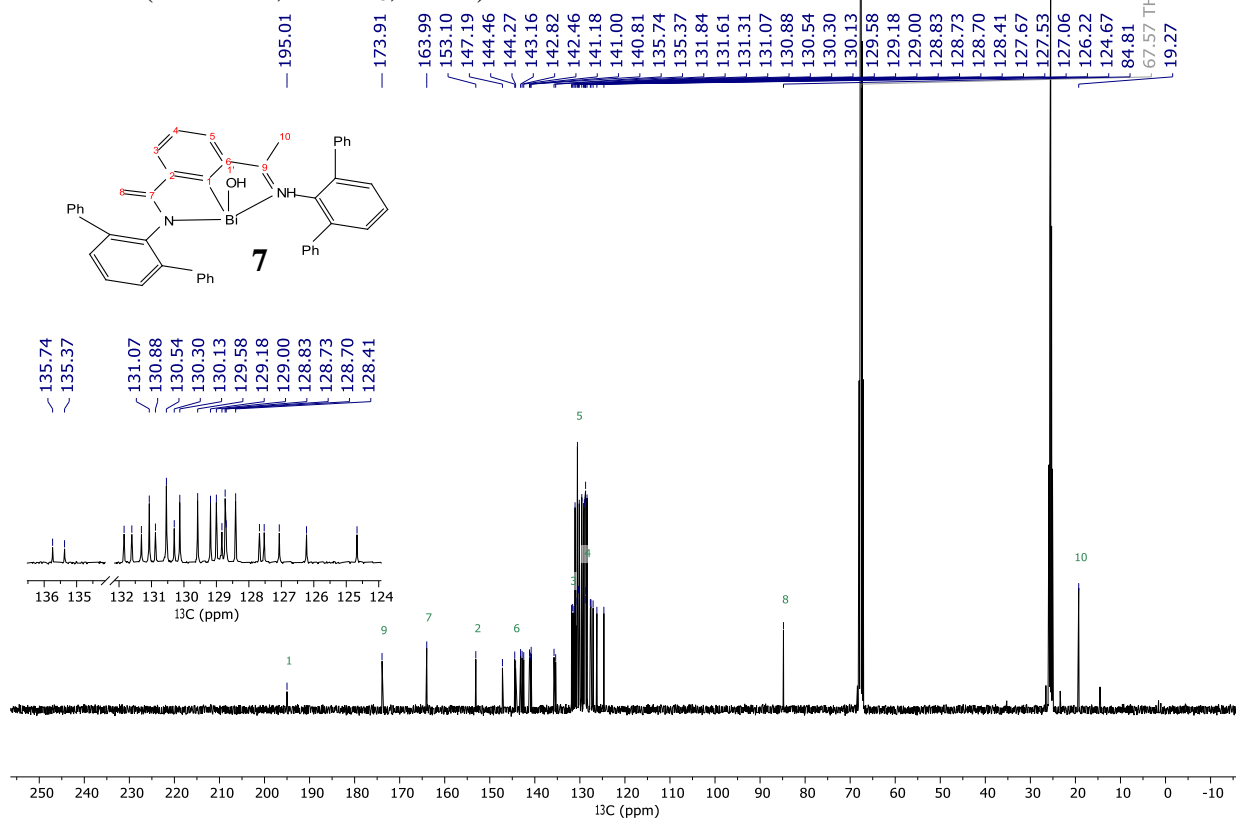

# $^1\text{H}$ - $^1\text{H}$ COSY



# Edited-HSQC

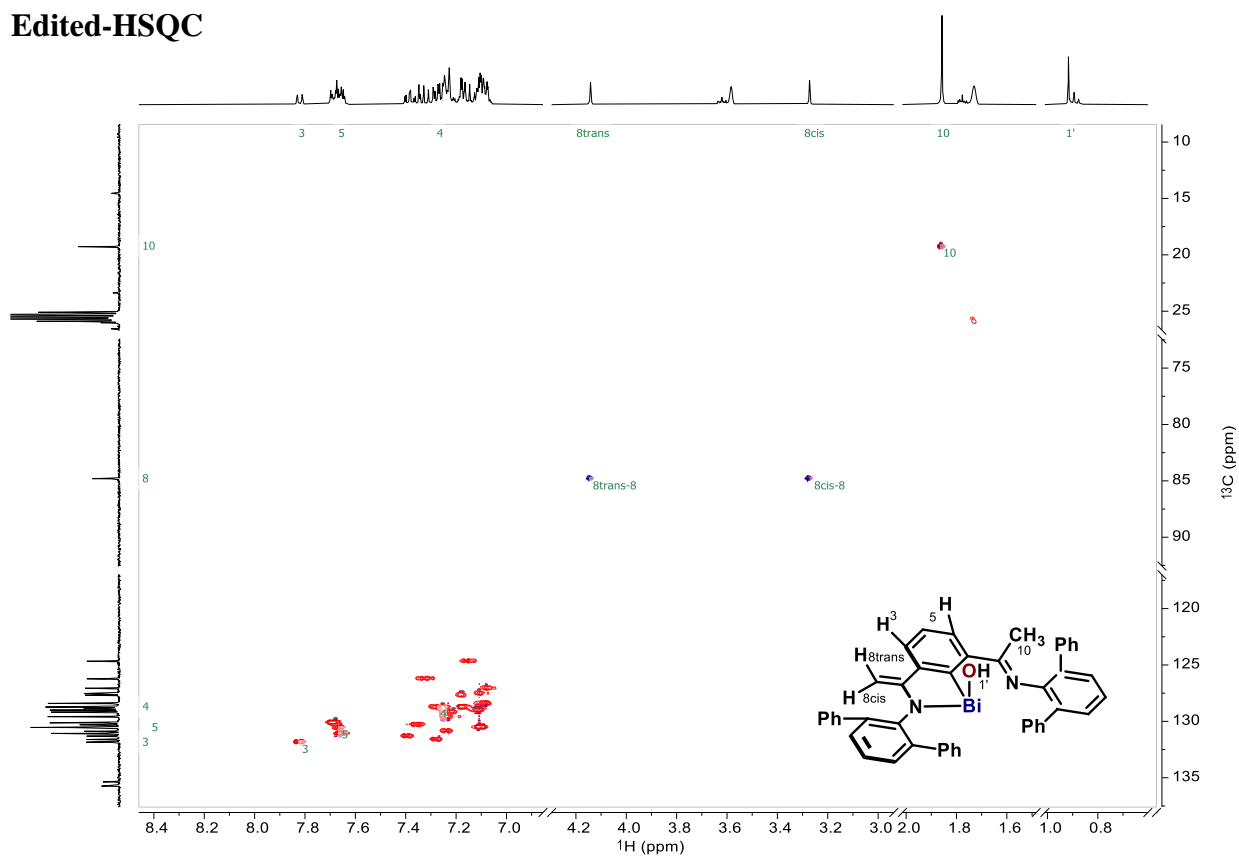

# HMBC



# ROESY

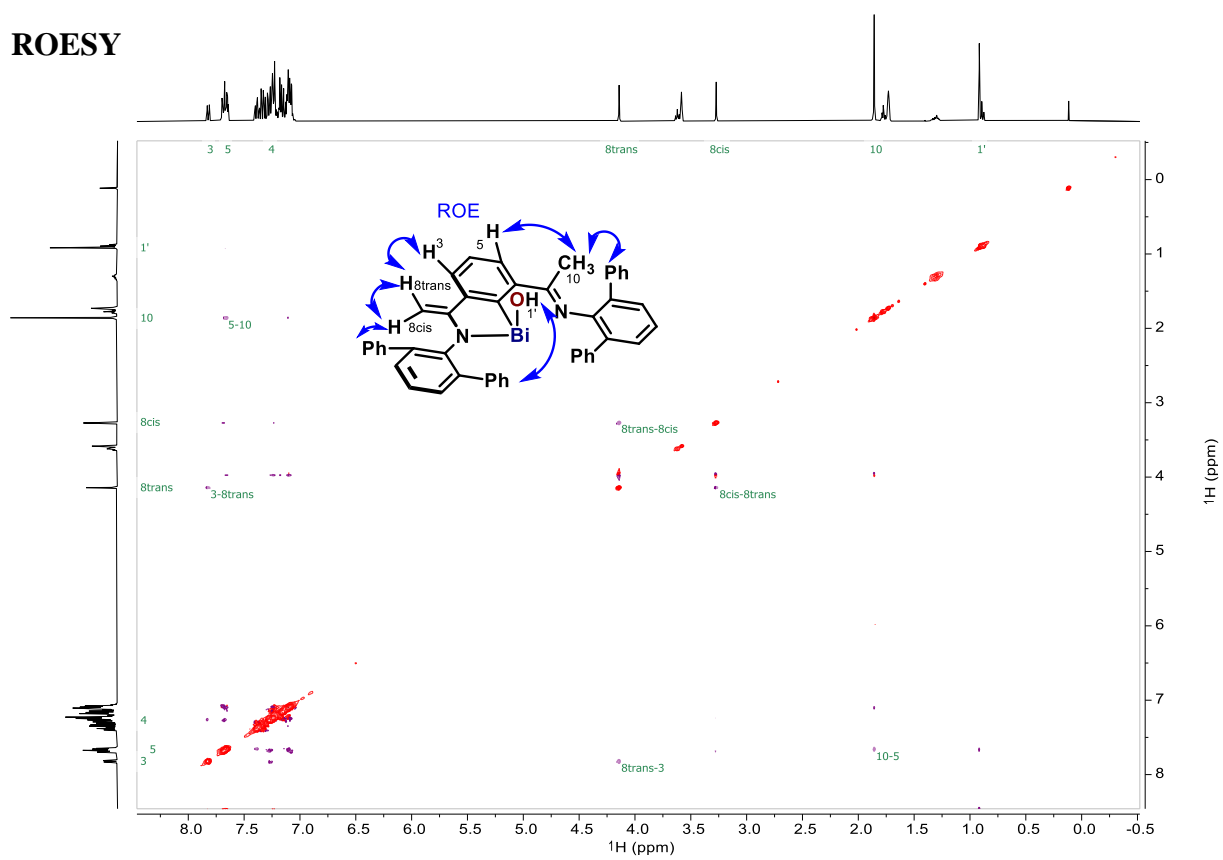

$^1\text{H}$  NMR (500 MHz, THF- $d_8$ )

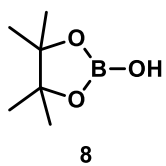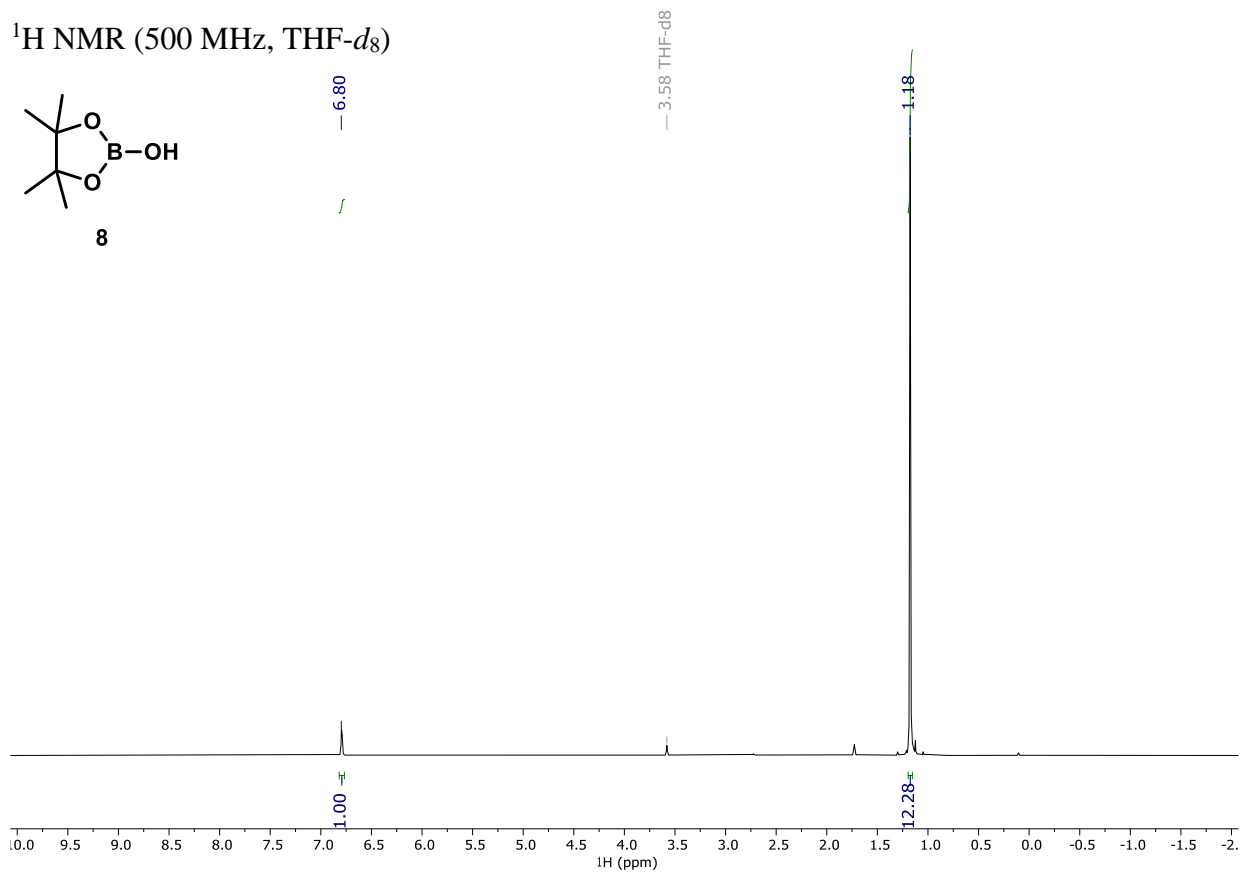

$^{13}\text{C}$  NMR (126 MHz, THF- $d_8$ )

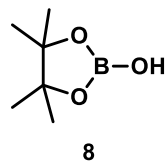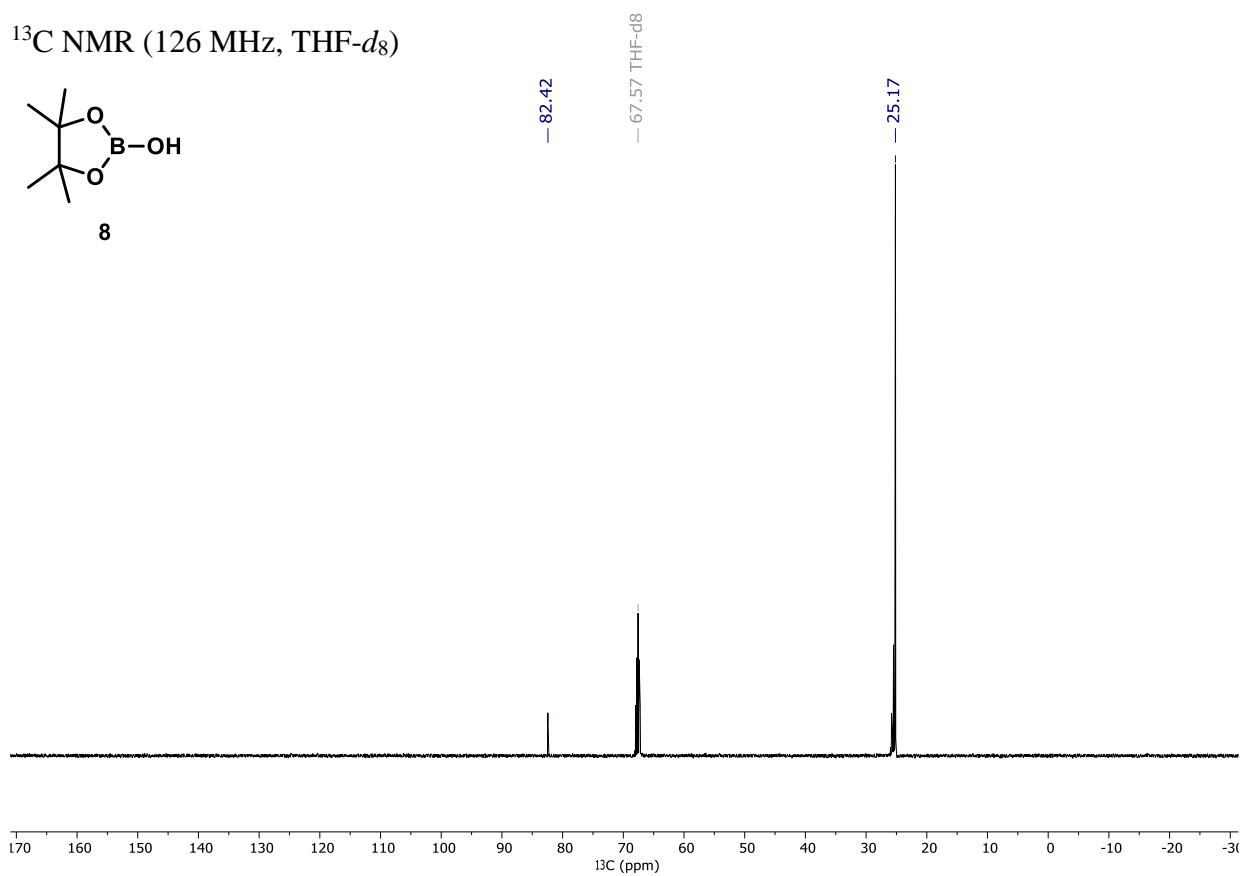

$^{11}\text{B}$  NMR (160 MHz,  $\text{THF-}d_8$ )

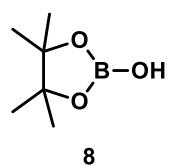

— 22.29

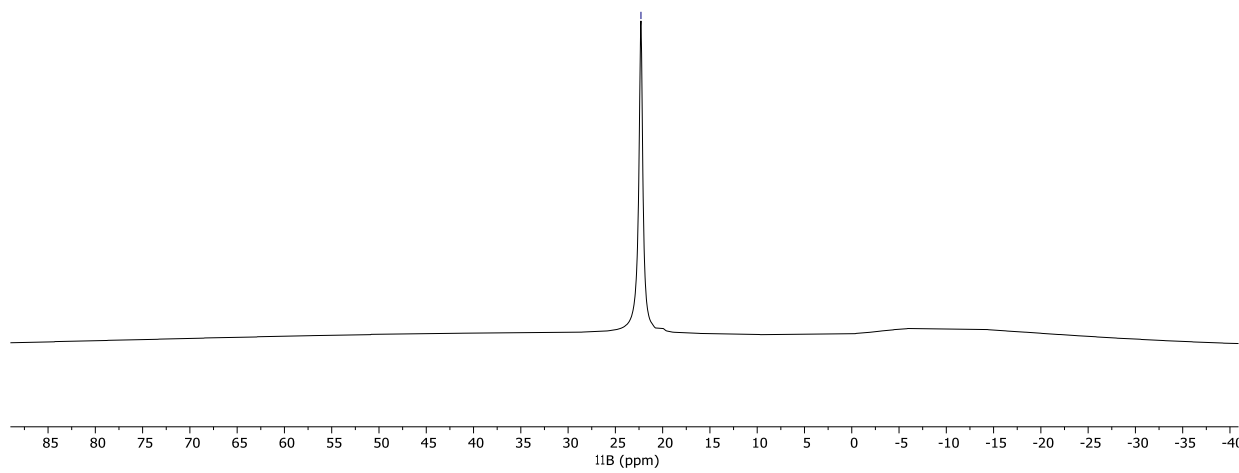

$^1\text{H}$  NMR (500 MHz, THF- $d_8$ )

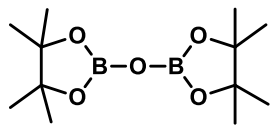

9

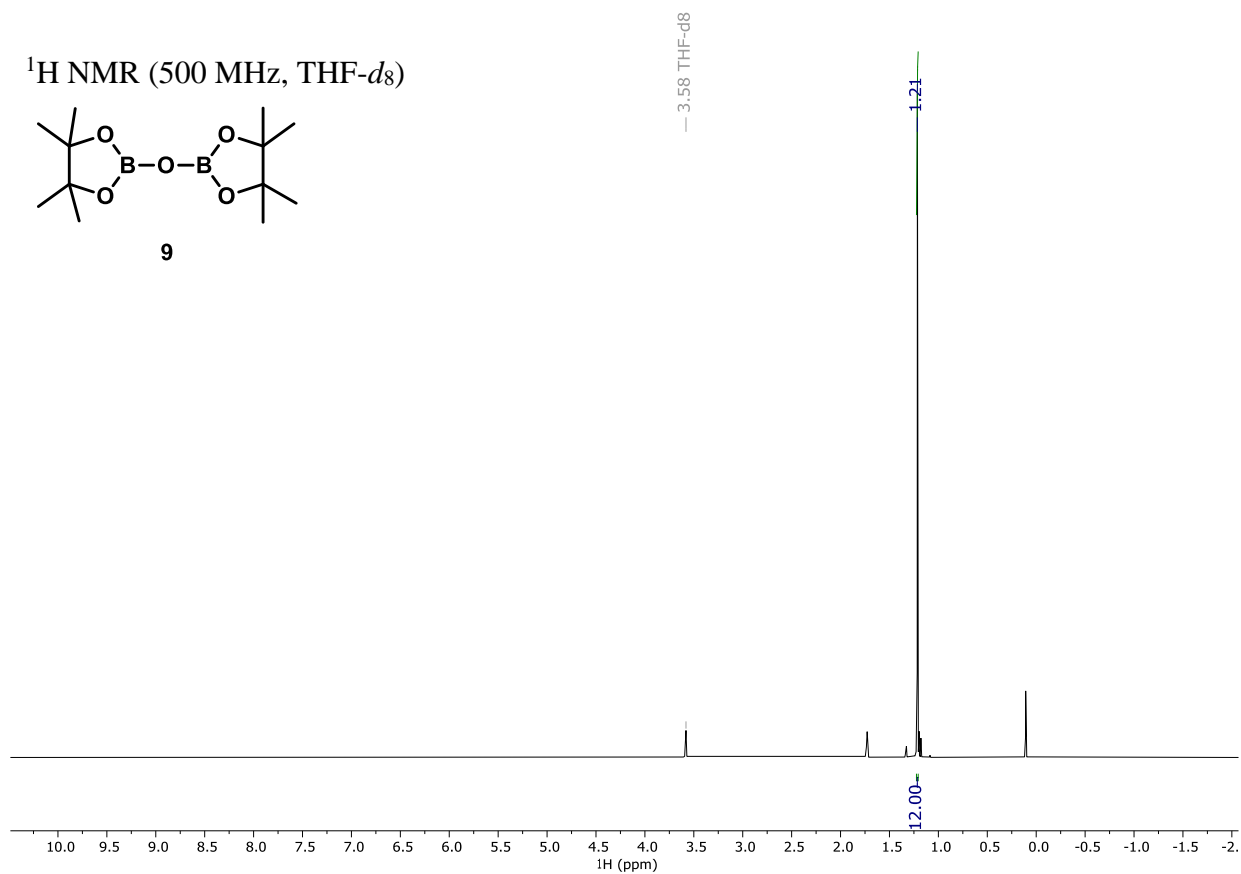

$^{13}\text{C}$  NMR (126 MHz, THF- $d_8$ )

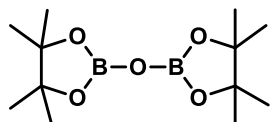

9

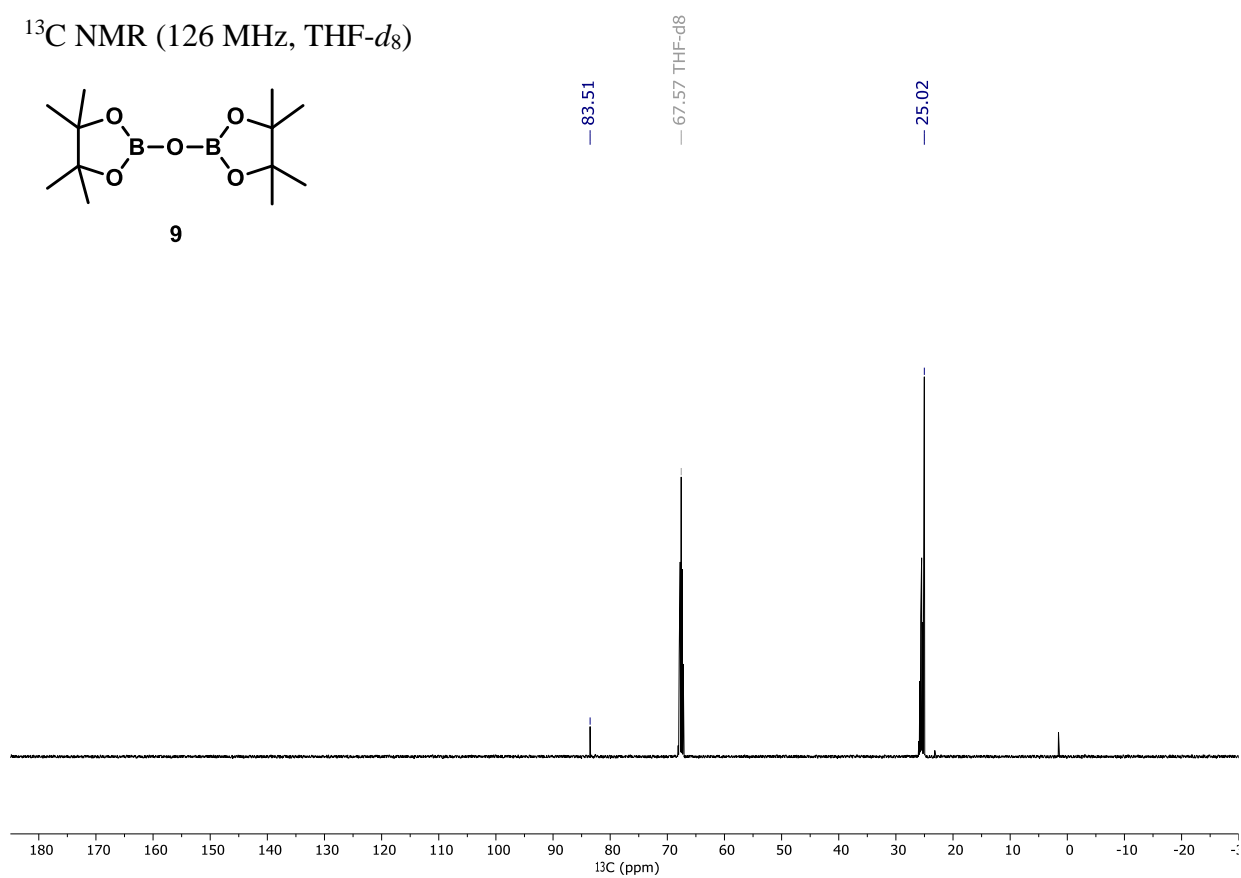

$^{11}\text{B}$  NMR (160 MHz, THF- $d_8$ )

— 21.11

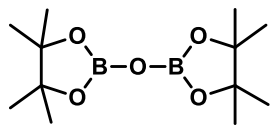

9

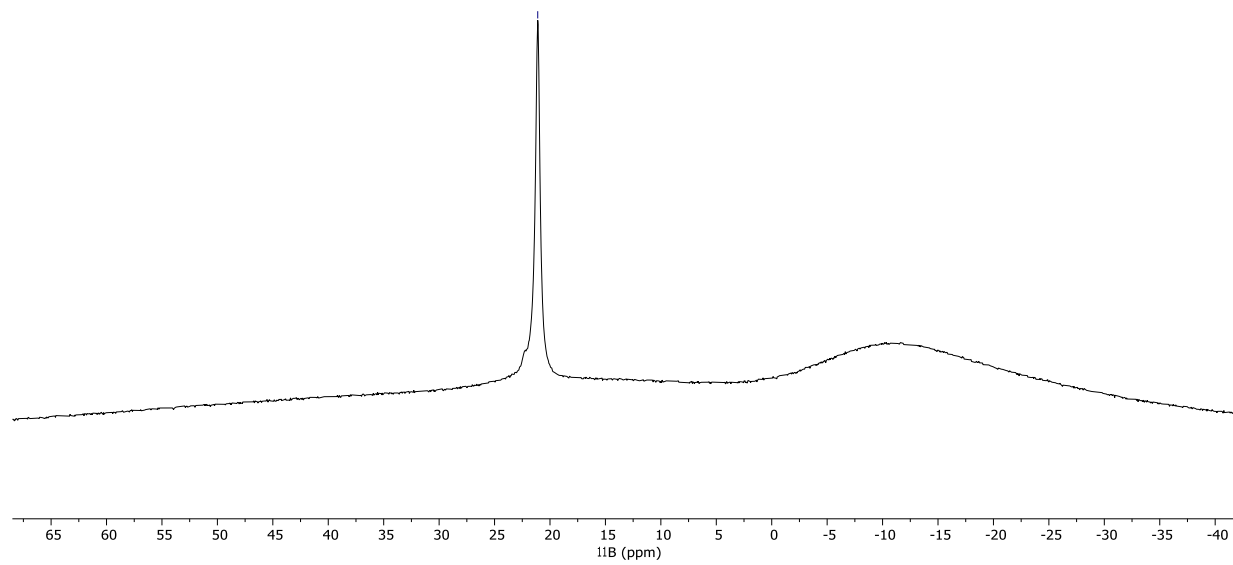

Supplement: ja0c10092_si_001.pdf [file ja0c10092_si_001.pdf]
